# Supplementary material for: Highly conjugated architectures and labile reaction intermediates from coupling between 10π electron-deficient heteroaromatics andsym-trihydroxy- or triamino-benzene derivatives
Source: Royal Society of Chemistry journal article supplement (doi:10.1039/c8ra09460h), 2018-01-01
Supplement: c8ra09460h1.pdf [file c8ra09460h1.pdf]

**HIGHLY CONJUGATED ARCHITECTURES AND LABILE REACTION INTERMEDIATES FROM COUPLING BETWEEN  $10\pi$  ELECTRON-DEFICIENT HETEROAROMATICS AND *SYN*-TRIHYDROXY- OR TRIAMINO-BENZENE DERIVATIVES**

Gabriele Micheletti,<sup>1\*</sup> Carla Boga,<sup>1</sup> Silvia Cino,<sup>1</sup> Silvia Bordoni,<sup>1</sup> Elena Chugunova<sup>2</sup>

<sup>1</sup> Department of Industrial Chemistry 'Toso Montanari', Alma Mater Studiorum Università di Bologna Viale Del Risorgimento, 4 402136 Bologna Italy.

<sup>2</sup> A. E. Arbuzov Institute of Organic and Physical Chemistry, Kazan Scientific Center, Russian Academy of Sciences, Akad. Arbuzovst. 8, Kazan, Tatarstan 420088 Russia.

\* Correspondence to: gabriele.micheletti3@unibo.it; Tel.: +39-051-2093616

**Content**

|                                                                                                                | <b>Page</b> |
|----------------------------------------------------------------------------------------------------------------|-------------|
| Copies of <sup>1</sup> H NMR and <sup>13</sup> C NMR spectra of new substitution products                      | 2           |
| Copies of <sup>1</sup> H NMR, <sup>13</sup> C NMR spectra of Wheland Meisenheimer intermediates <b>WM1-WM5</b> | 27          |
| Copies of <sup>1</sup> H NMR, <sup>13</sup> C NMR and HSQC spectra of Meisenheimer intermediates <b>M1-M6</b>  | 37          |

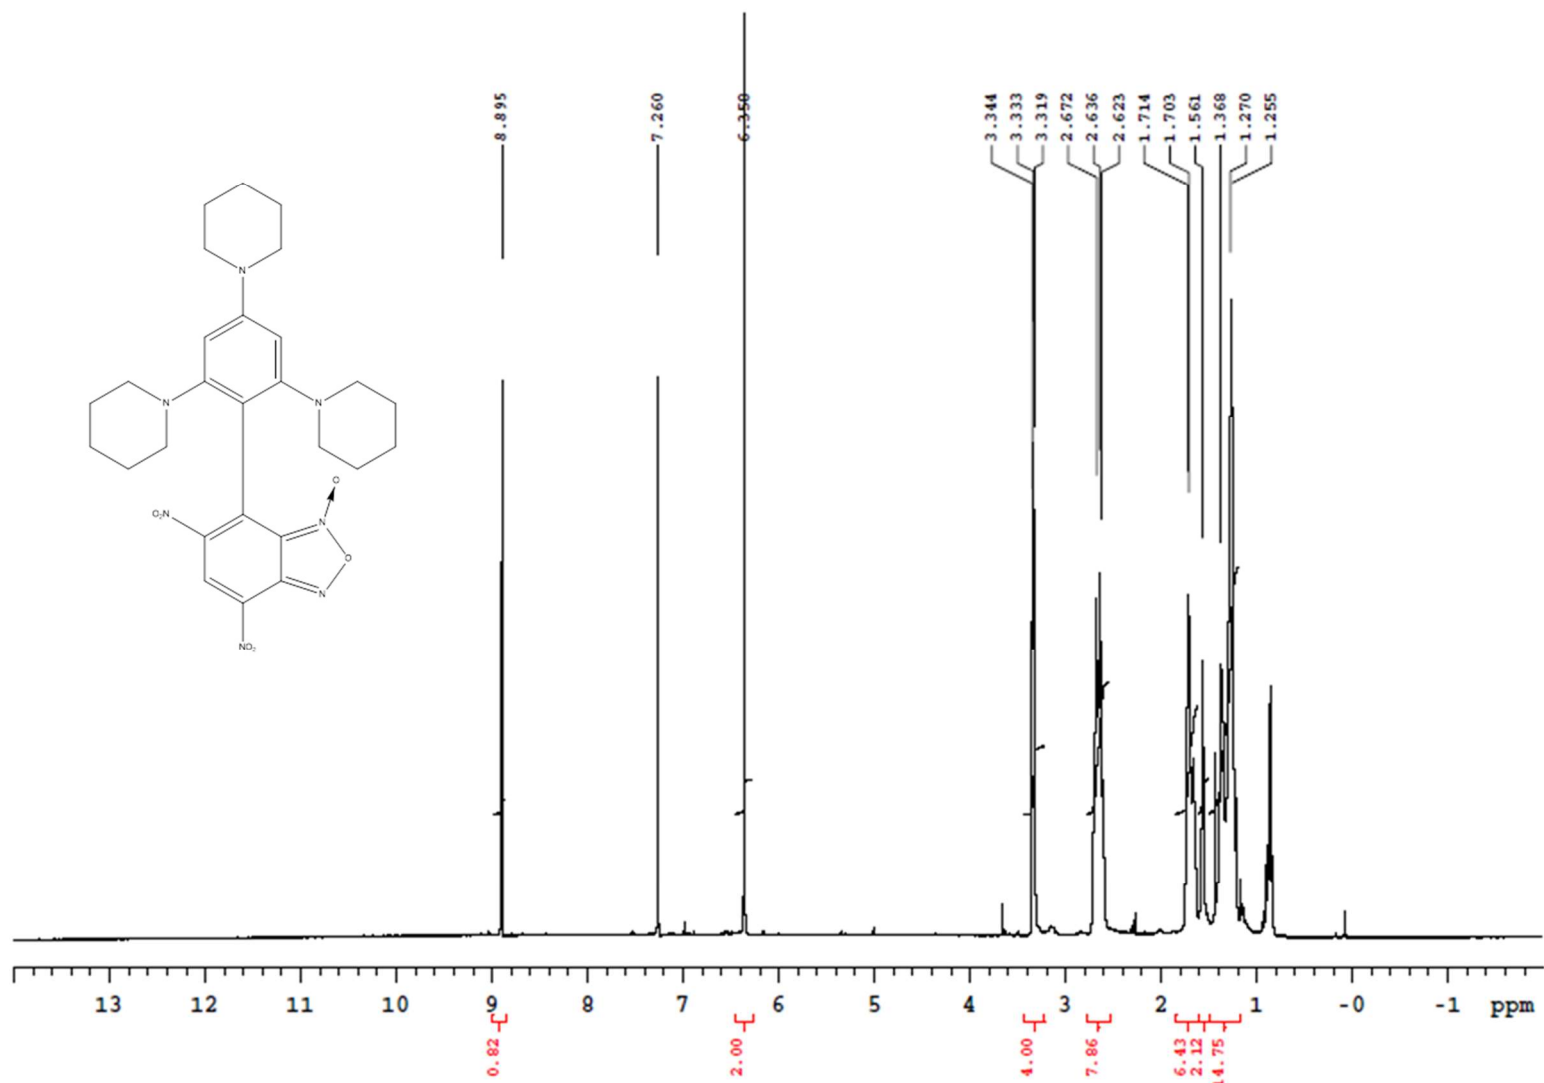

Figure SI-1. <sup>1</sup>H NMR spectrum (CDCl<sub>3</sub>, 400 MHz, 25 °C) of compound 6.

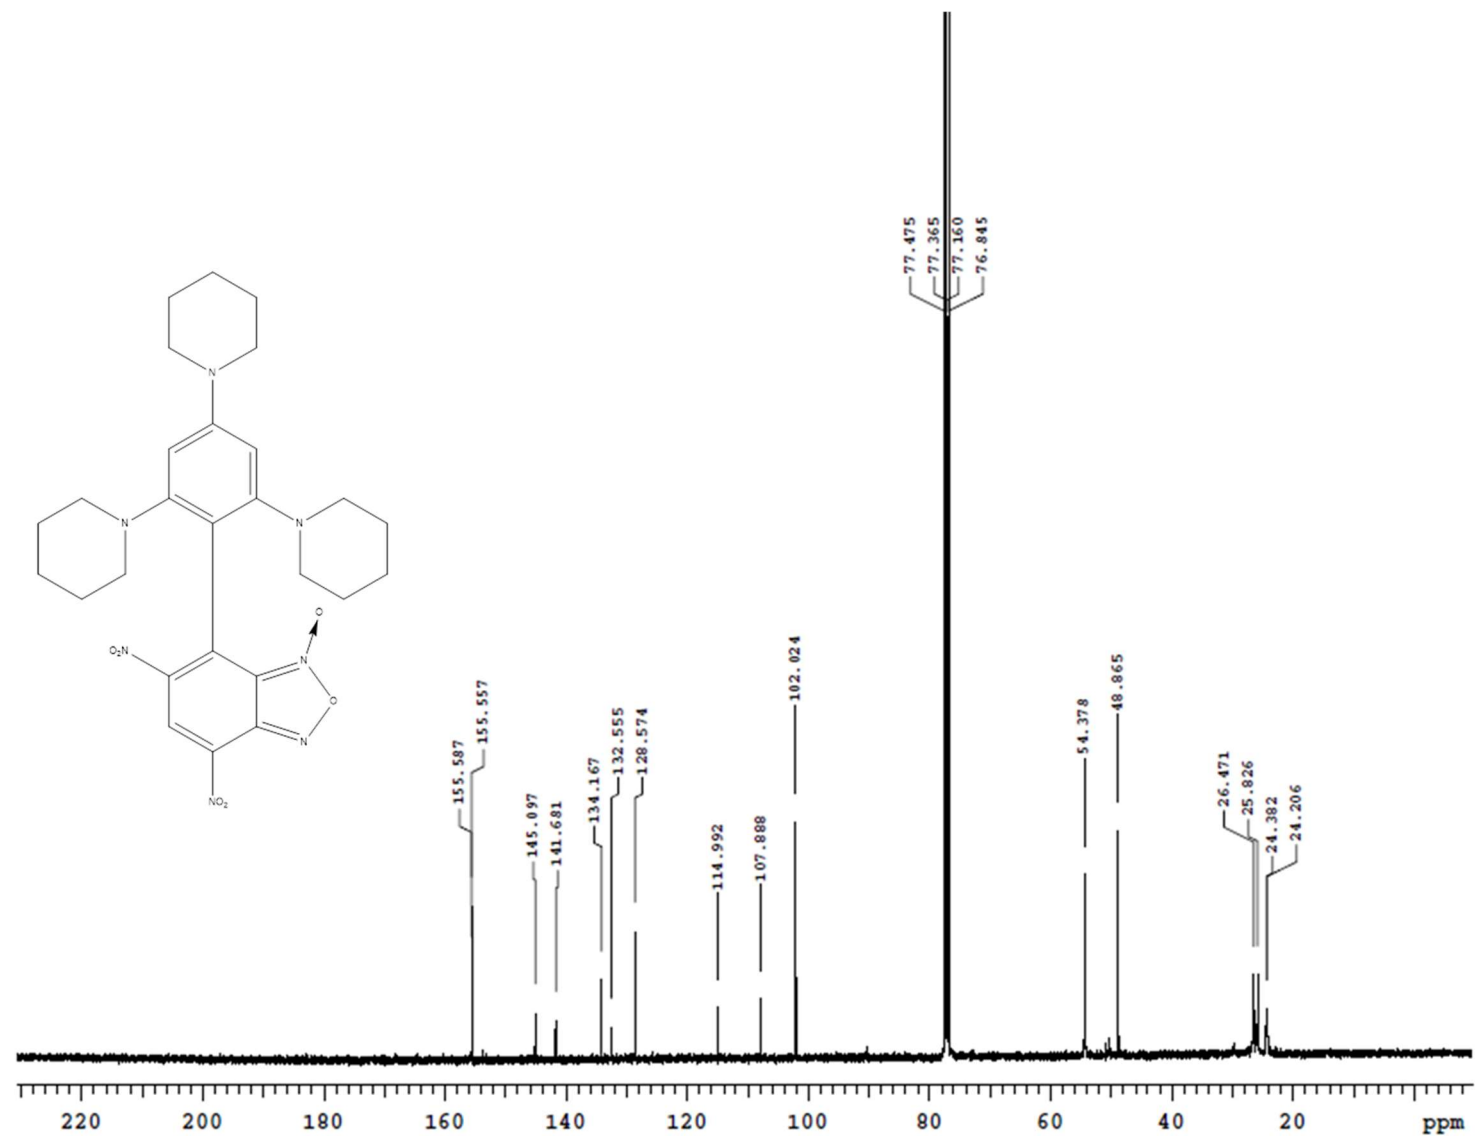

Figure SI-2. <sup>13</sup>C NMR spectrum (CDCl<sub>3</sub>, 100.56 MHz, 25 °C) of compound 6.

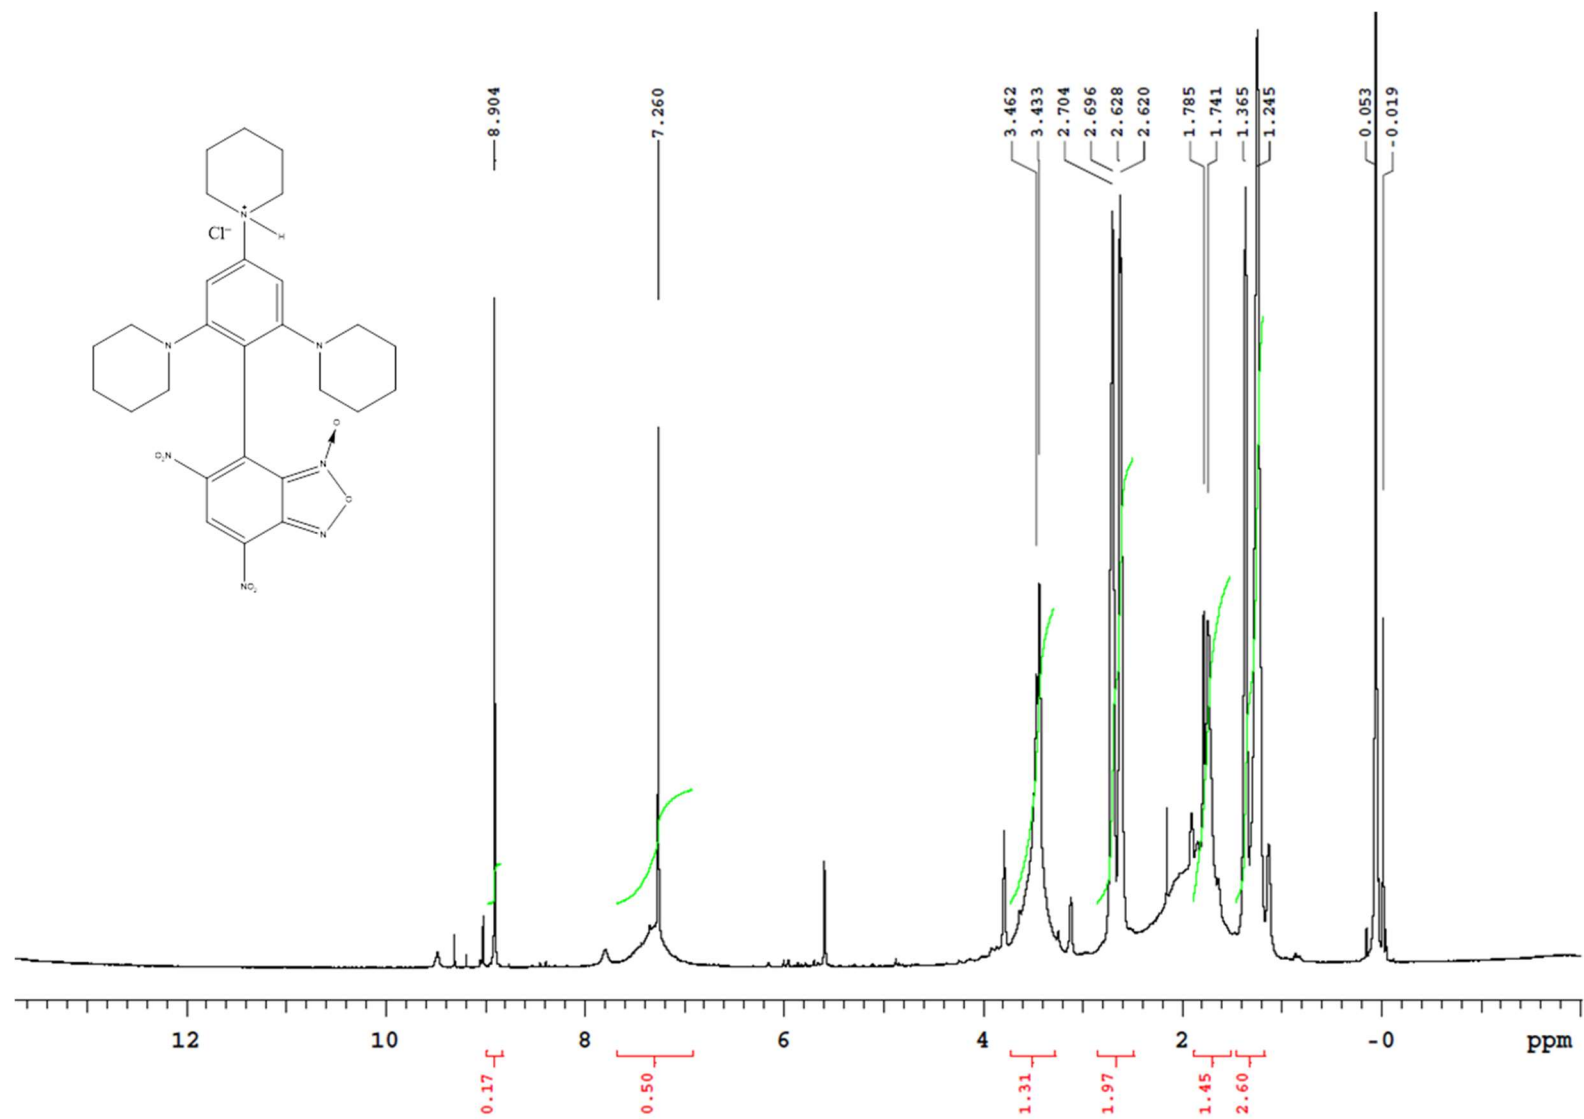

**Figure SI-3.** <sup>1</sup>H NMR spectrum (CDCl<sub>3</sub>, 600 MHz, 25 °C) of compound **6H**<sup>+</sup>Cl<sup>-</sup>.

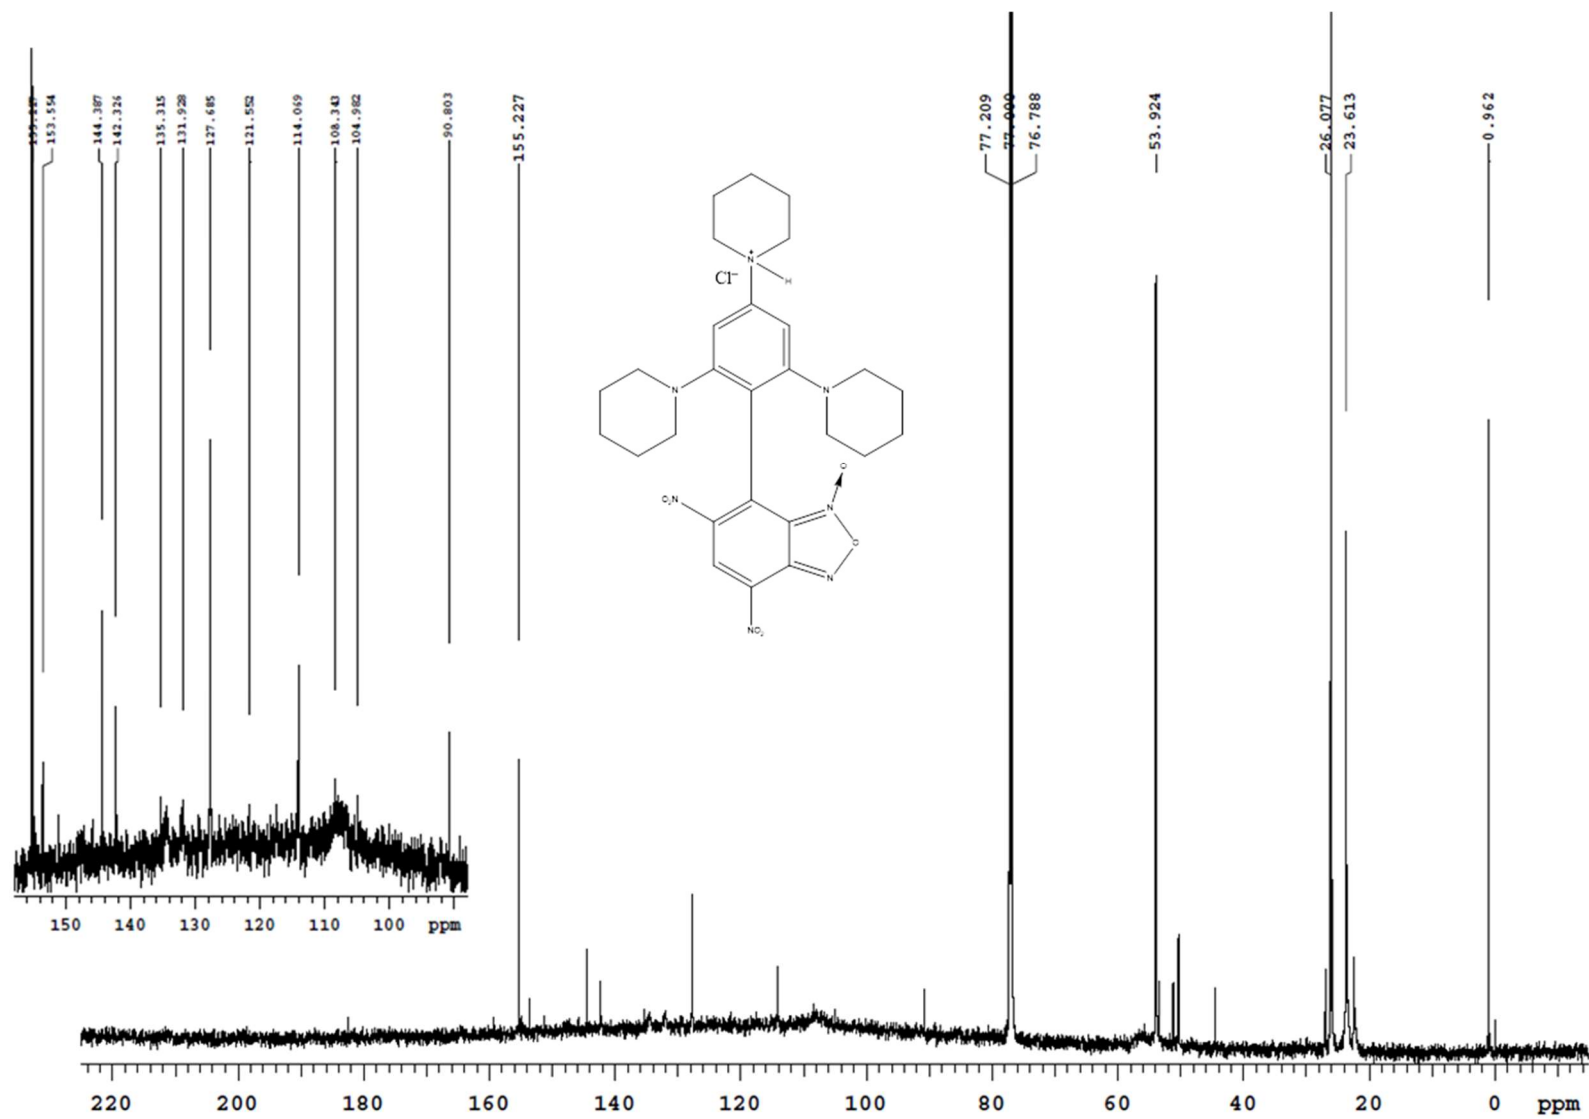

Figure SI-4.  $^{13}\text{C}$  NMR spectrum ( $\text{CDCl}_3$ , 150.56 MHz, 25 °C) of compound **6H** $^+\text{Cl}^-$ .

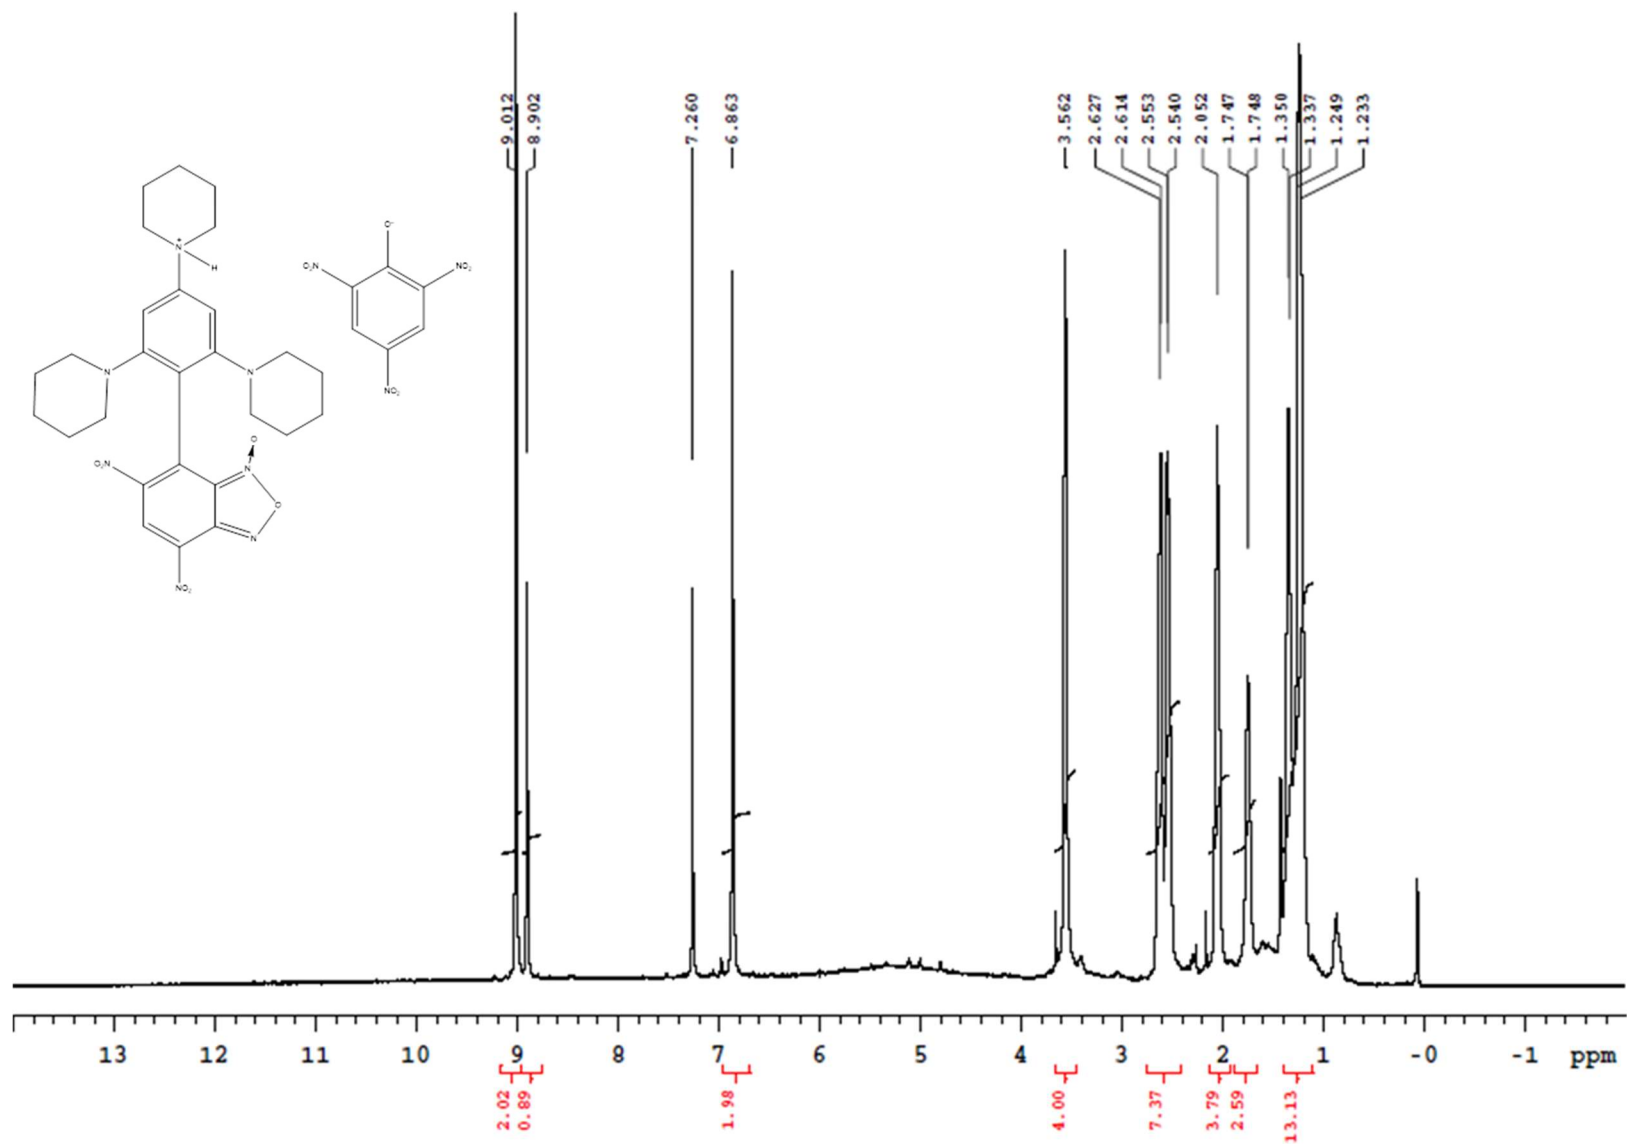

Figure SI-5. <sup>1</sup>H NMR spectrum (CDCl<sub>3</sub>, 400 MHz, 25 °C) of compound 6H<sup>+</sup>picrate.

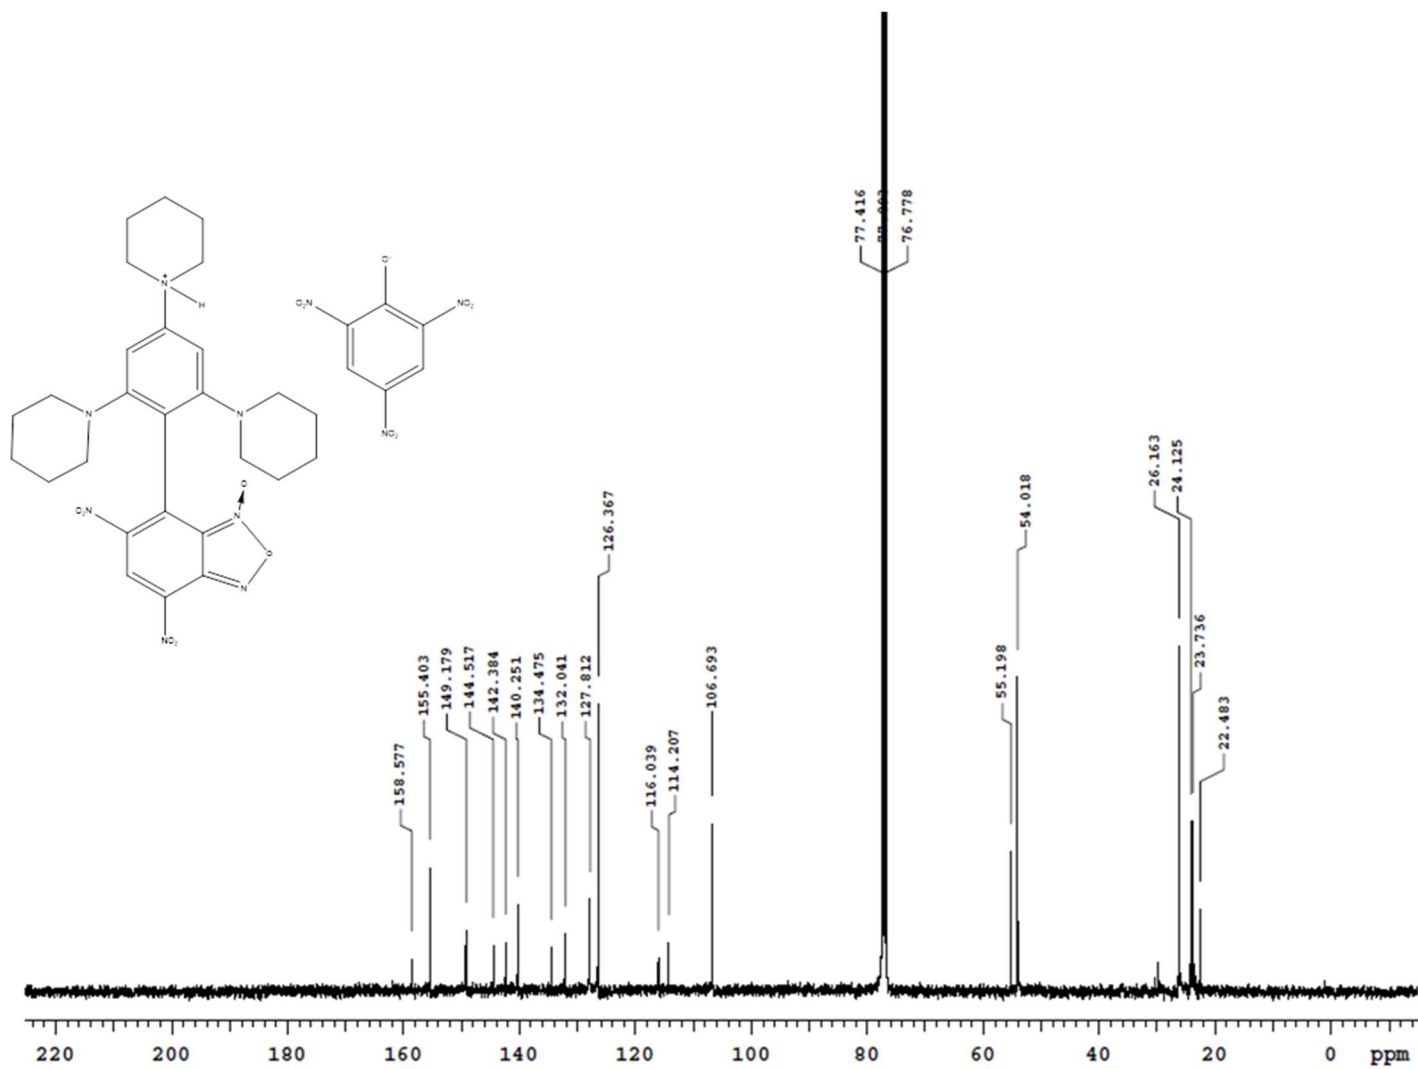

Figure SI-6. <sup>13</sup>C NMR spectrum (CDCl<sub>3</sub>, 100.56 MHz, 25 °C) of compound 6H<sup>+</sup> picrate.

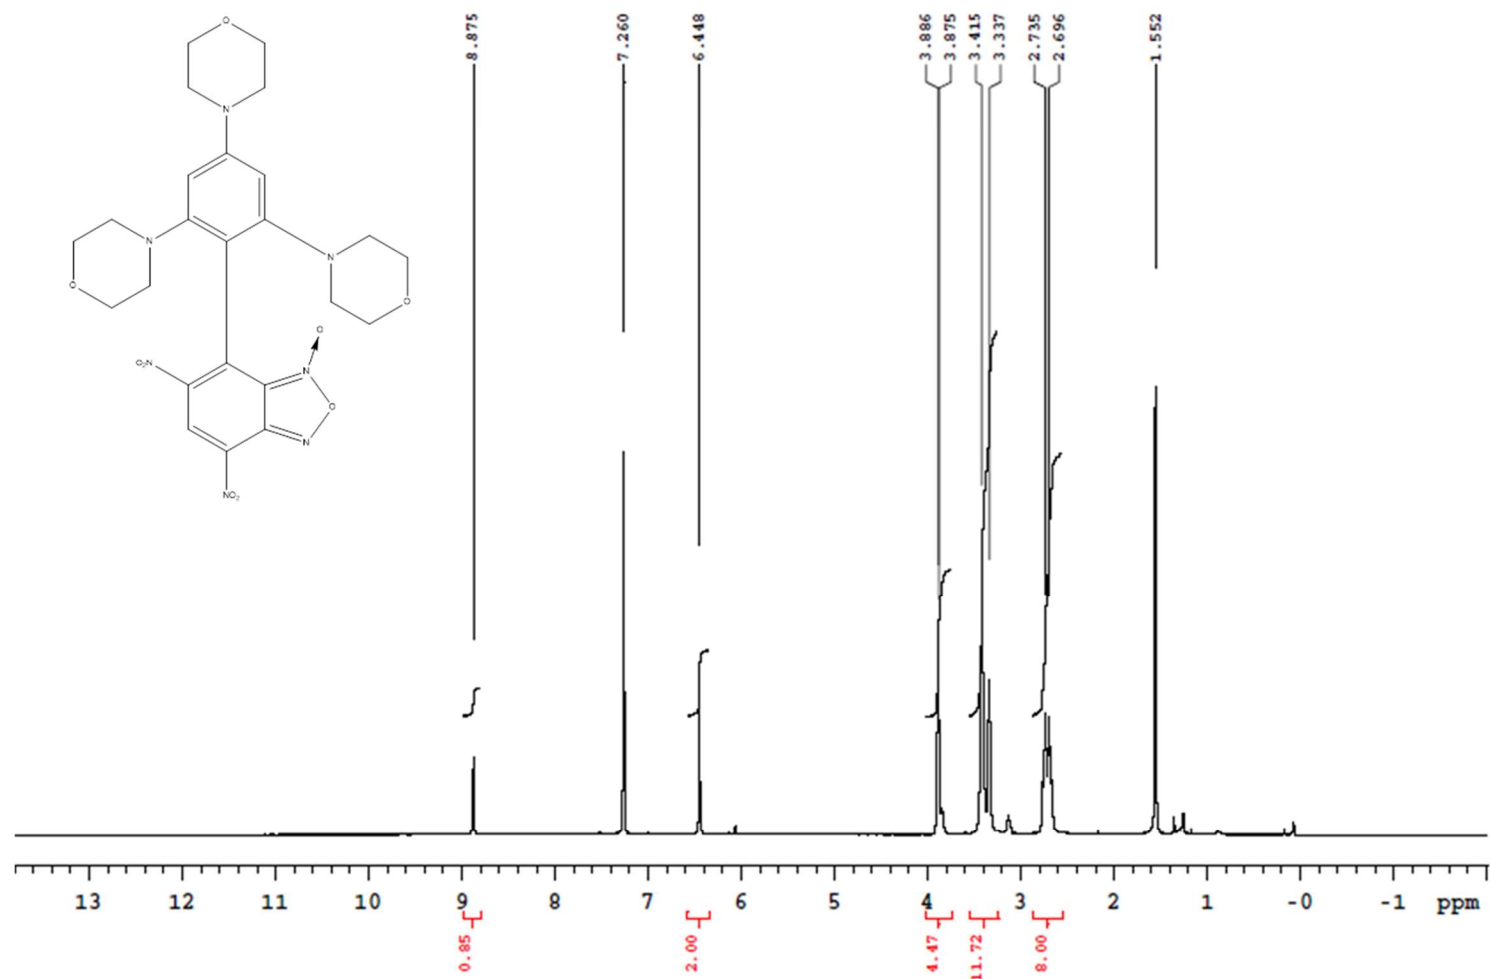

Figure SI-7. <sup>1</sup>H NMR spectrum (CDCl<sub>3</sub>, 400 MHz, 25 °C) of compound 7.



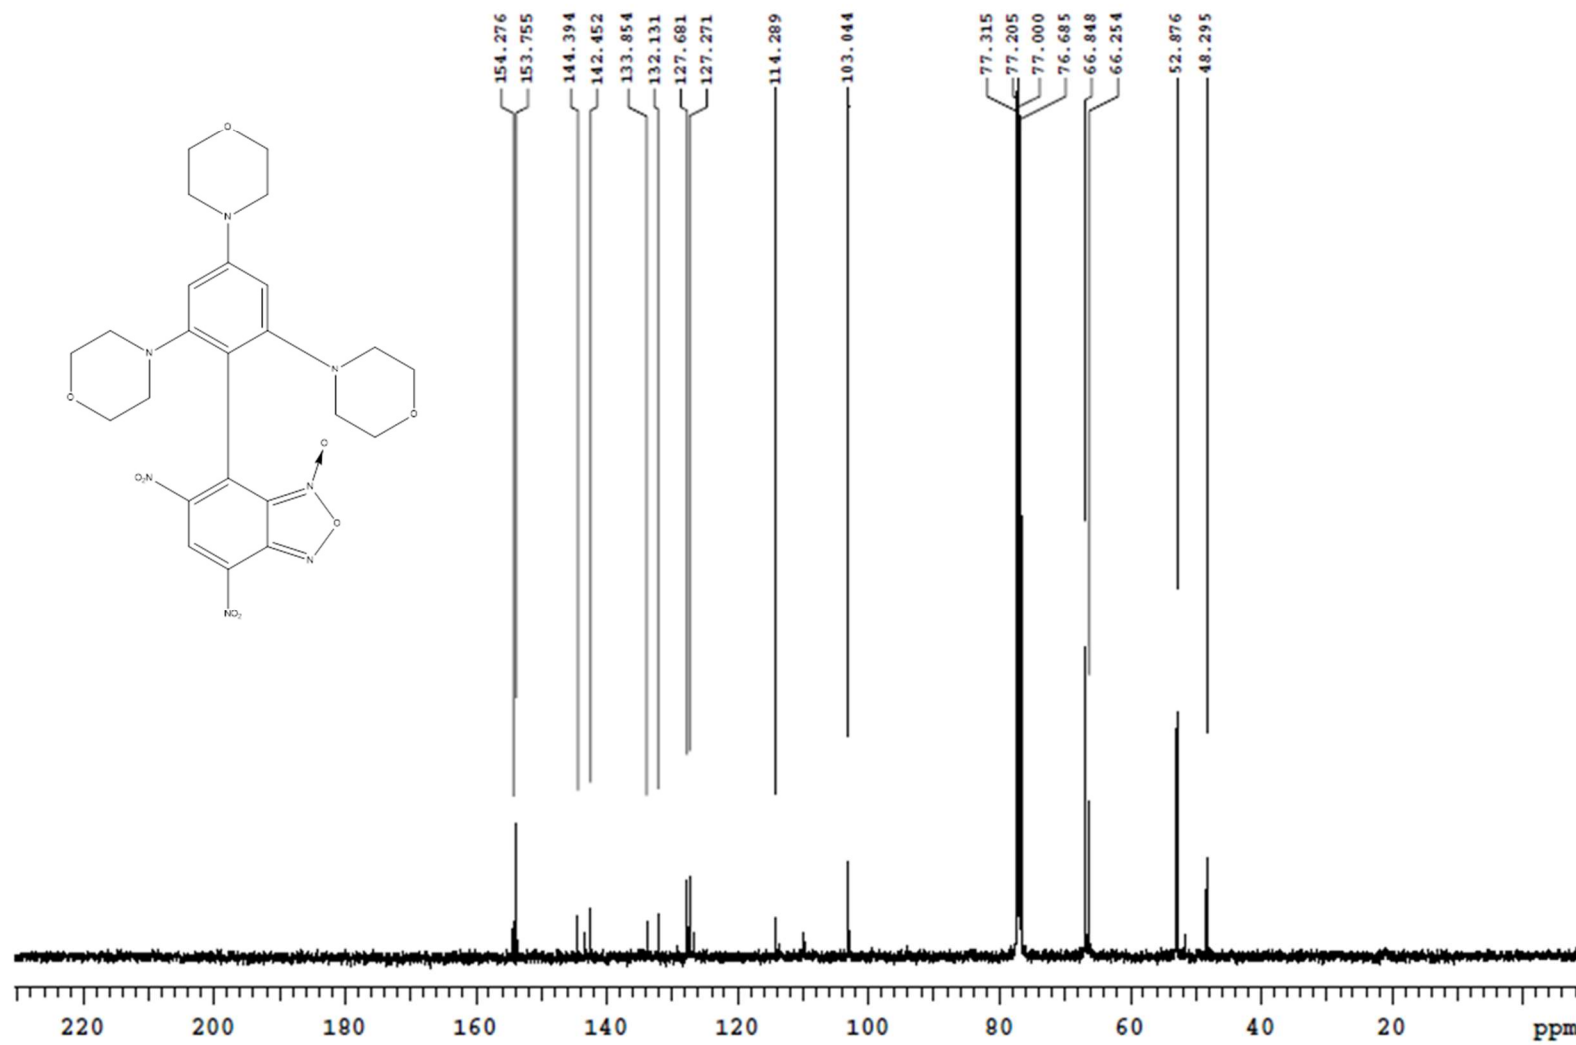

Figure SI-8. <sup>13</sup>C NMR spectrum (CDCl<sub>3</sub>, 100.56 MHz, 25 °C) of compound 7.

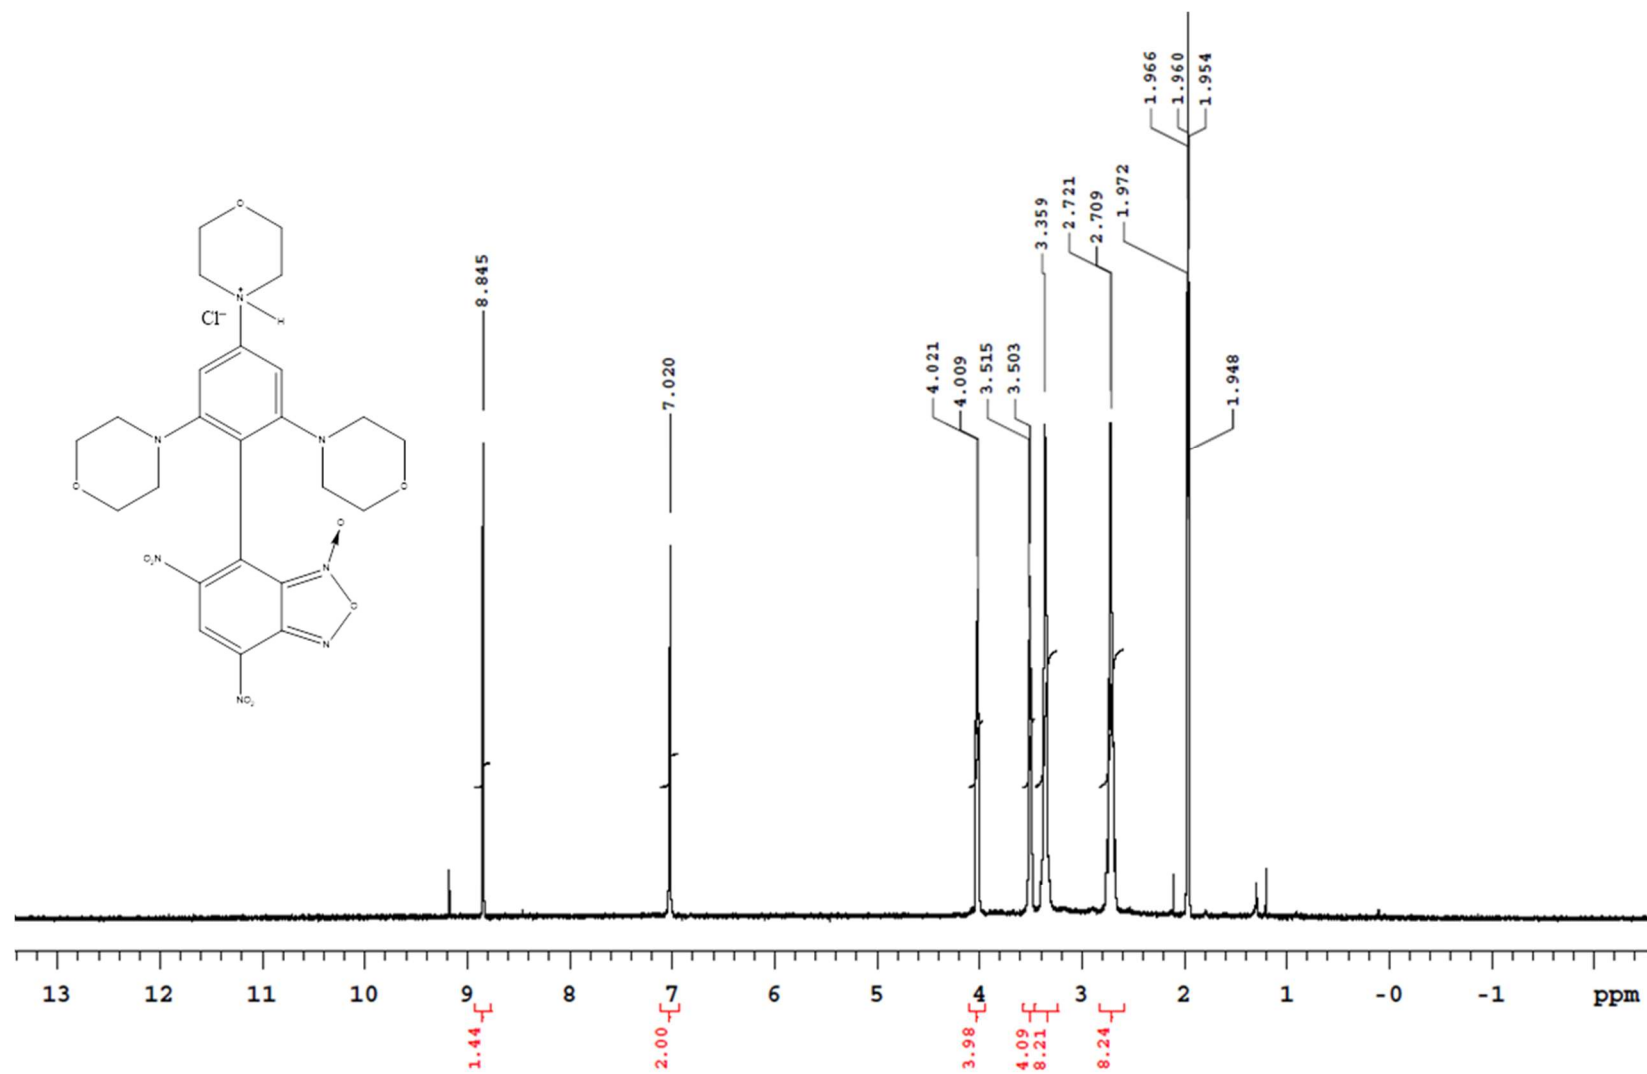

Figure SI-9. <sup>1</sup>H NMR spectrum (CDCl<sub>3</sub>, 400 MHz, 25 °C) of compound 7H<sup>+</sup>Cl<sup>-</sup>.

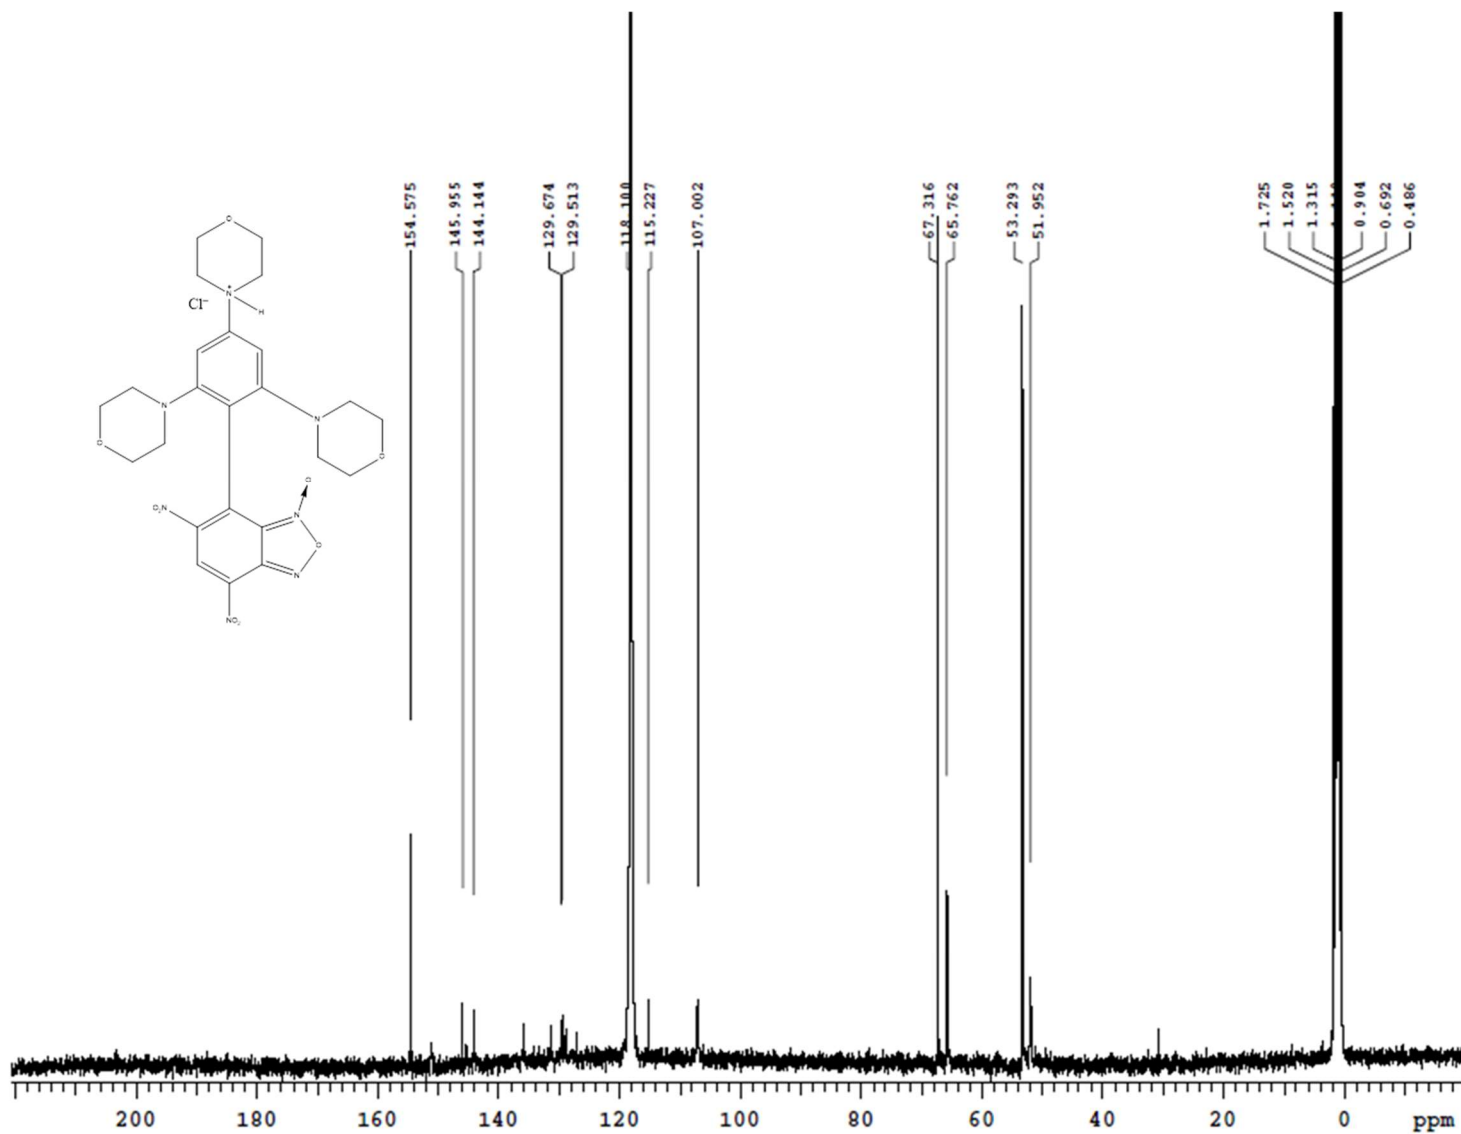

**Figure SI-10.** <sup>13</sup>C NMR spectrum (CDCl<sub>3</sub>, 100.56 MHz, 25 °C) of compound 7H<sup>+</sup>Cl<sup>-</sup>.

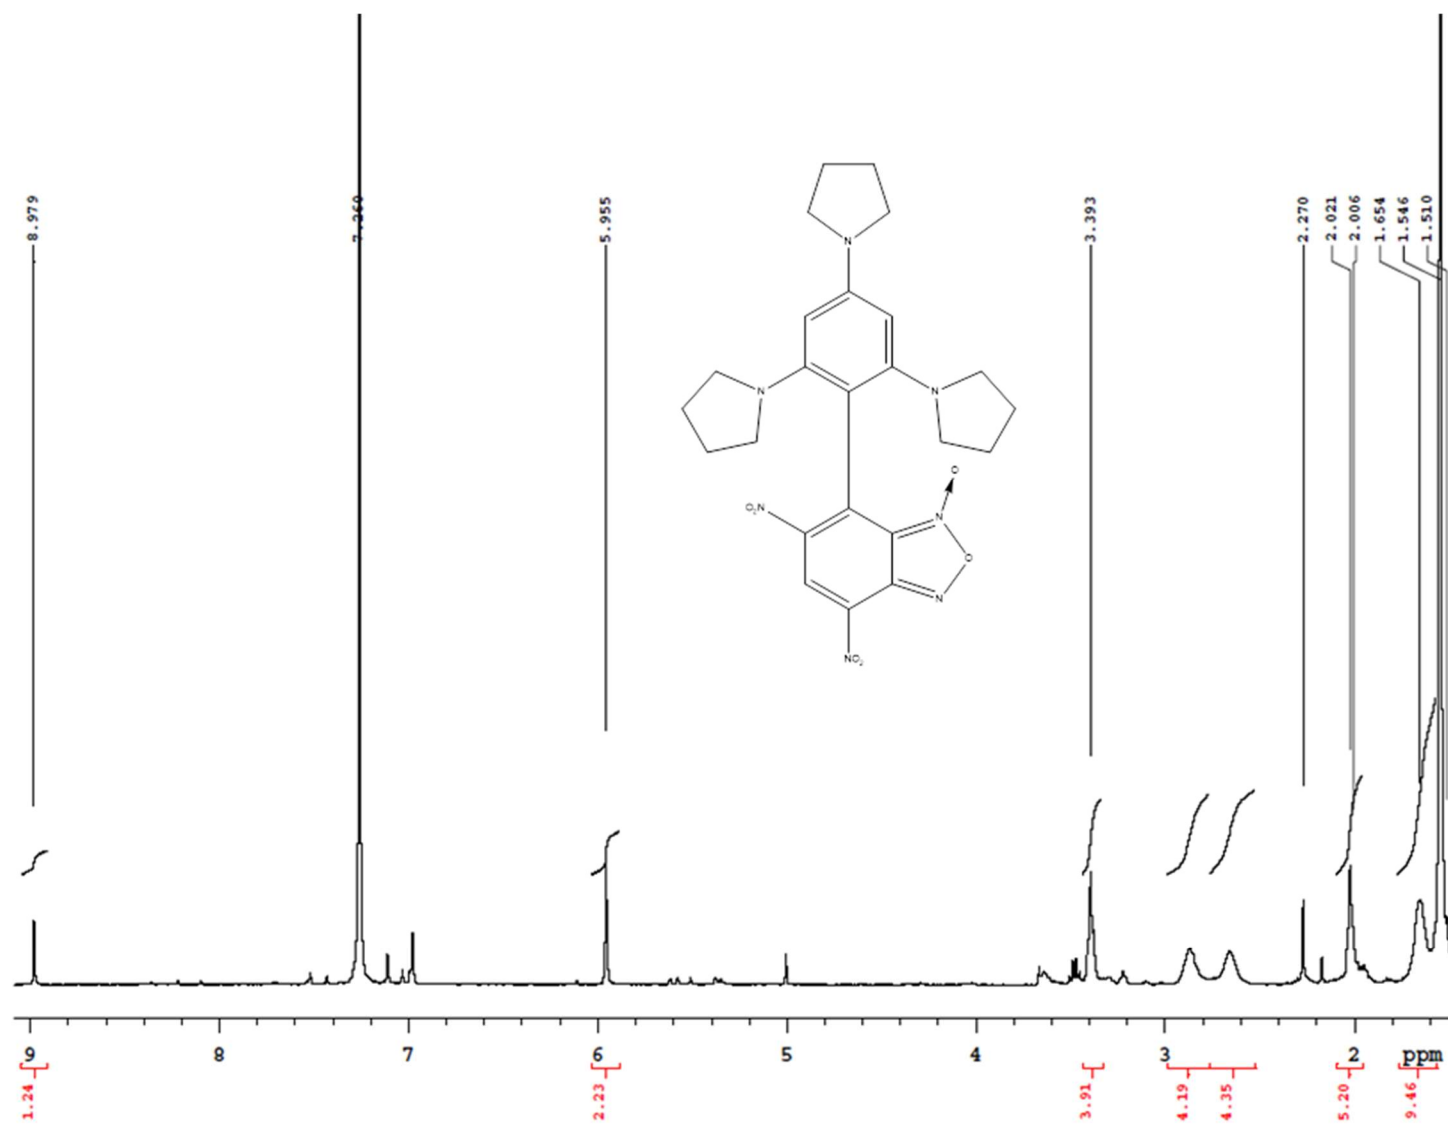

Figure SI-11. <sup>1</sup>H NMR spectrum (CDCl<sub>3</sub>, 400 MHz, 25 °C) of compound **8**.

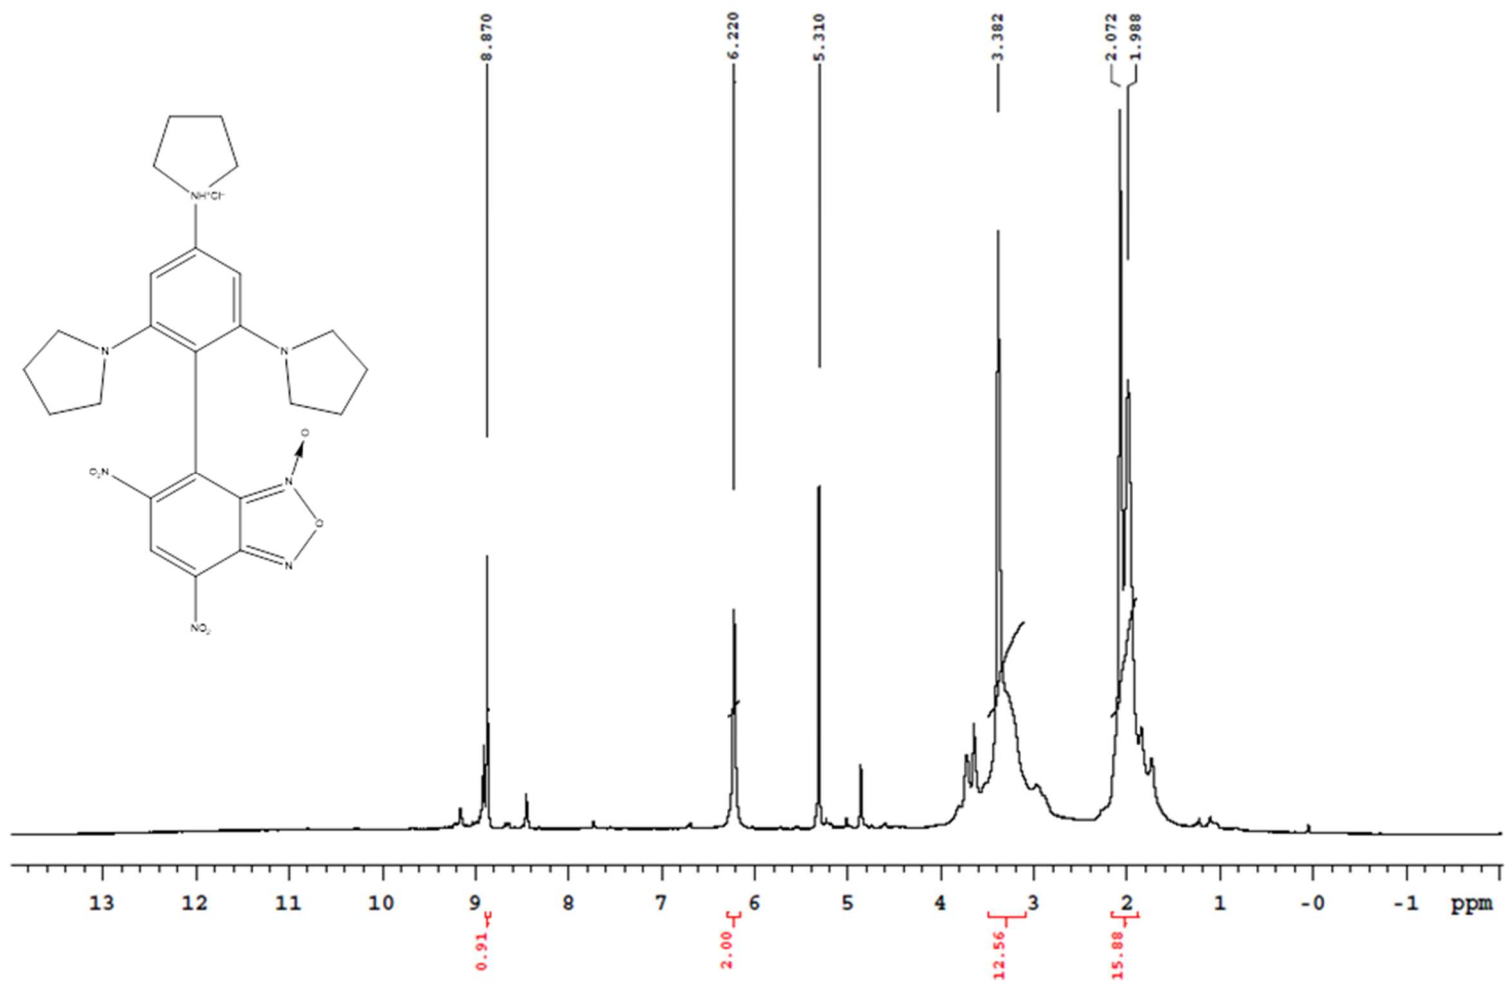

Figure SI-12. <sup>1</sup>H NMR spectrum (CD<sub>2</sub>Cl<sub>2</sub>, 600 MHz, 0 °C) of compound **8**H<sup>+</sup>Cl<sup>-</sup>.

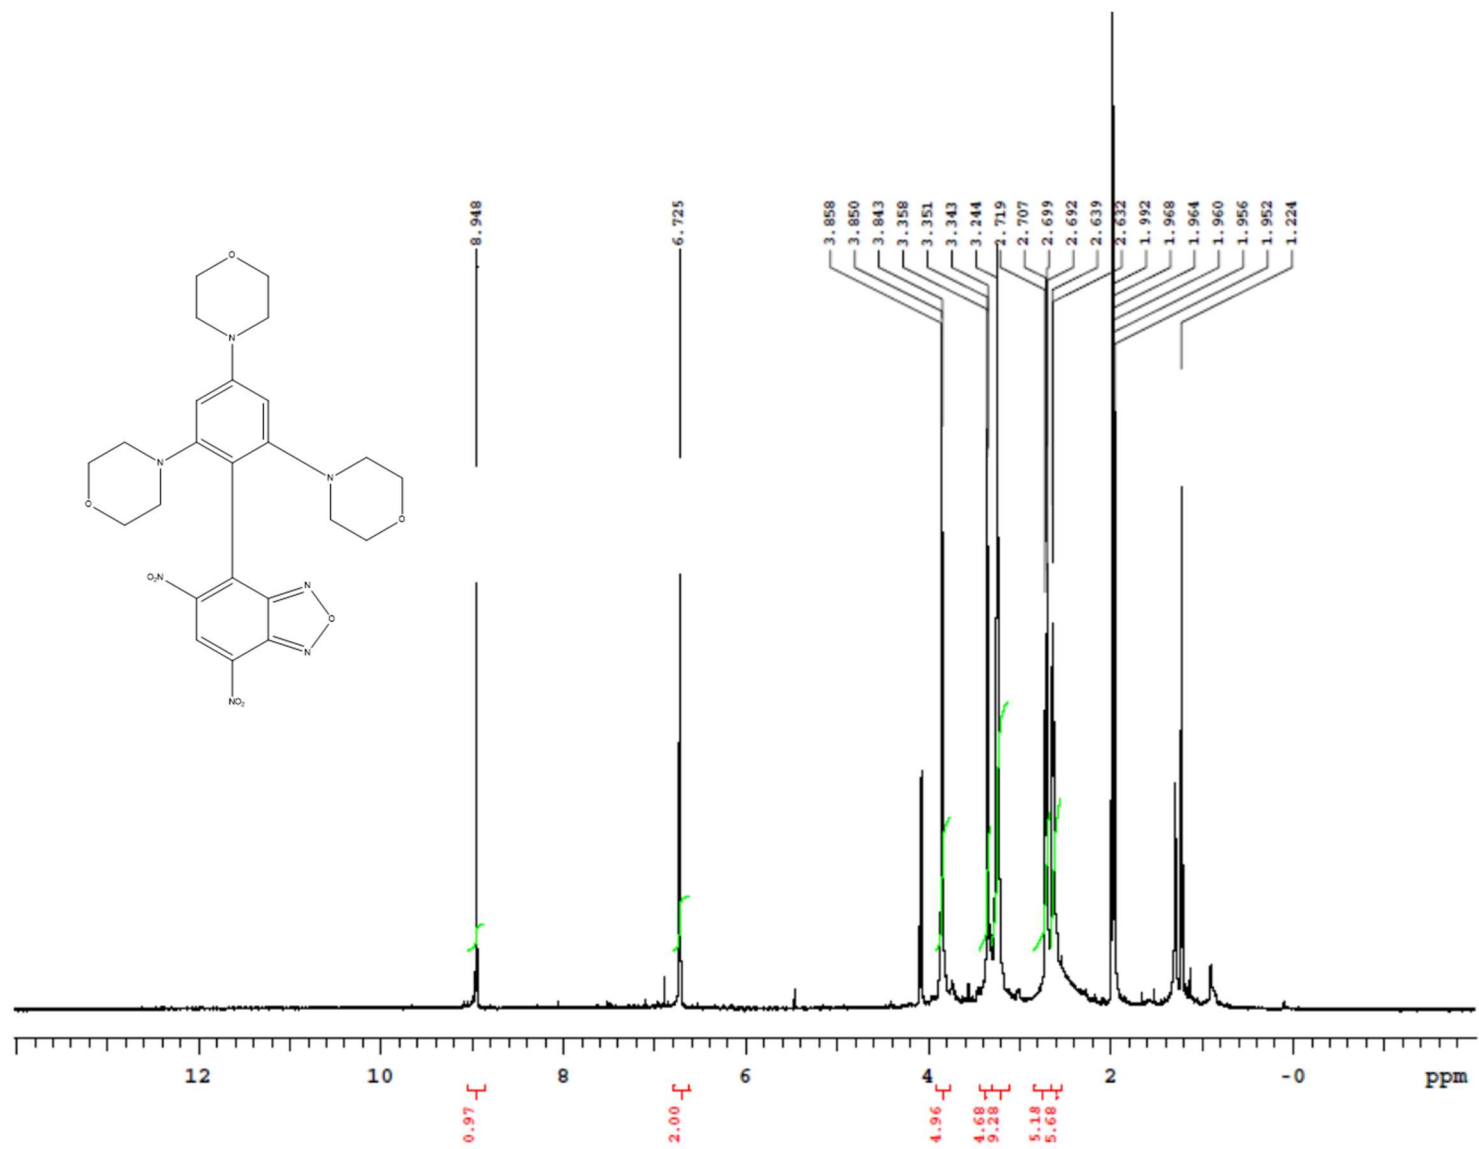

Figure SI-13. <sup>1</sup>H NMR spectrum (CD<sub>3</sub>CN, 600 MHz, 25 °C) of compound 10.

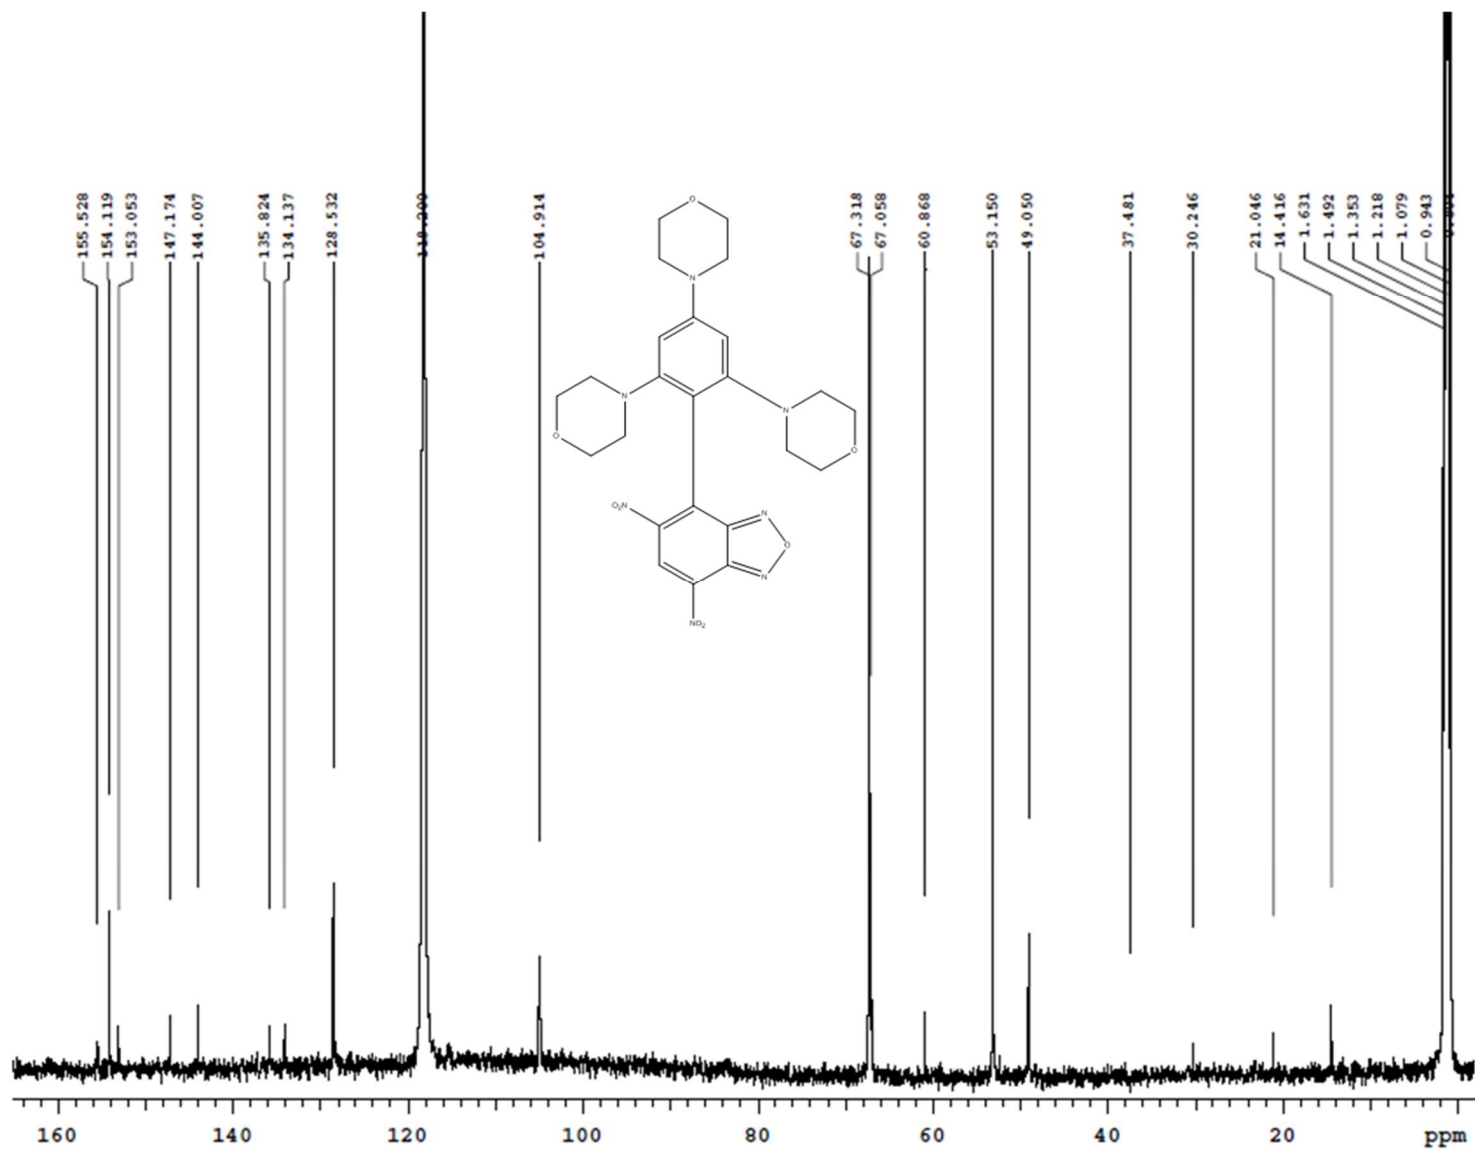

Figure SI-14. <sup>13</sup>C NMR spectrum (CD<sub>3</sub>CN, 100.6 MHz, 25 °C) of compound 10.

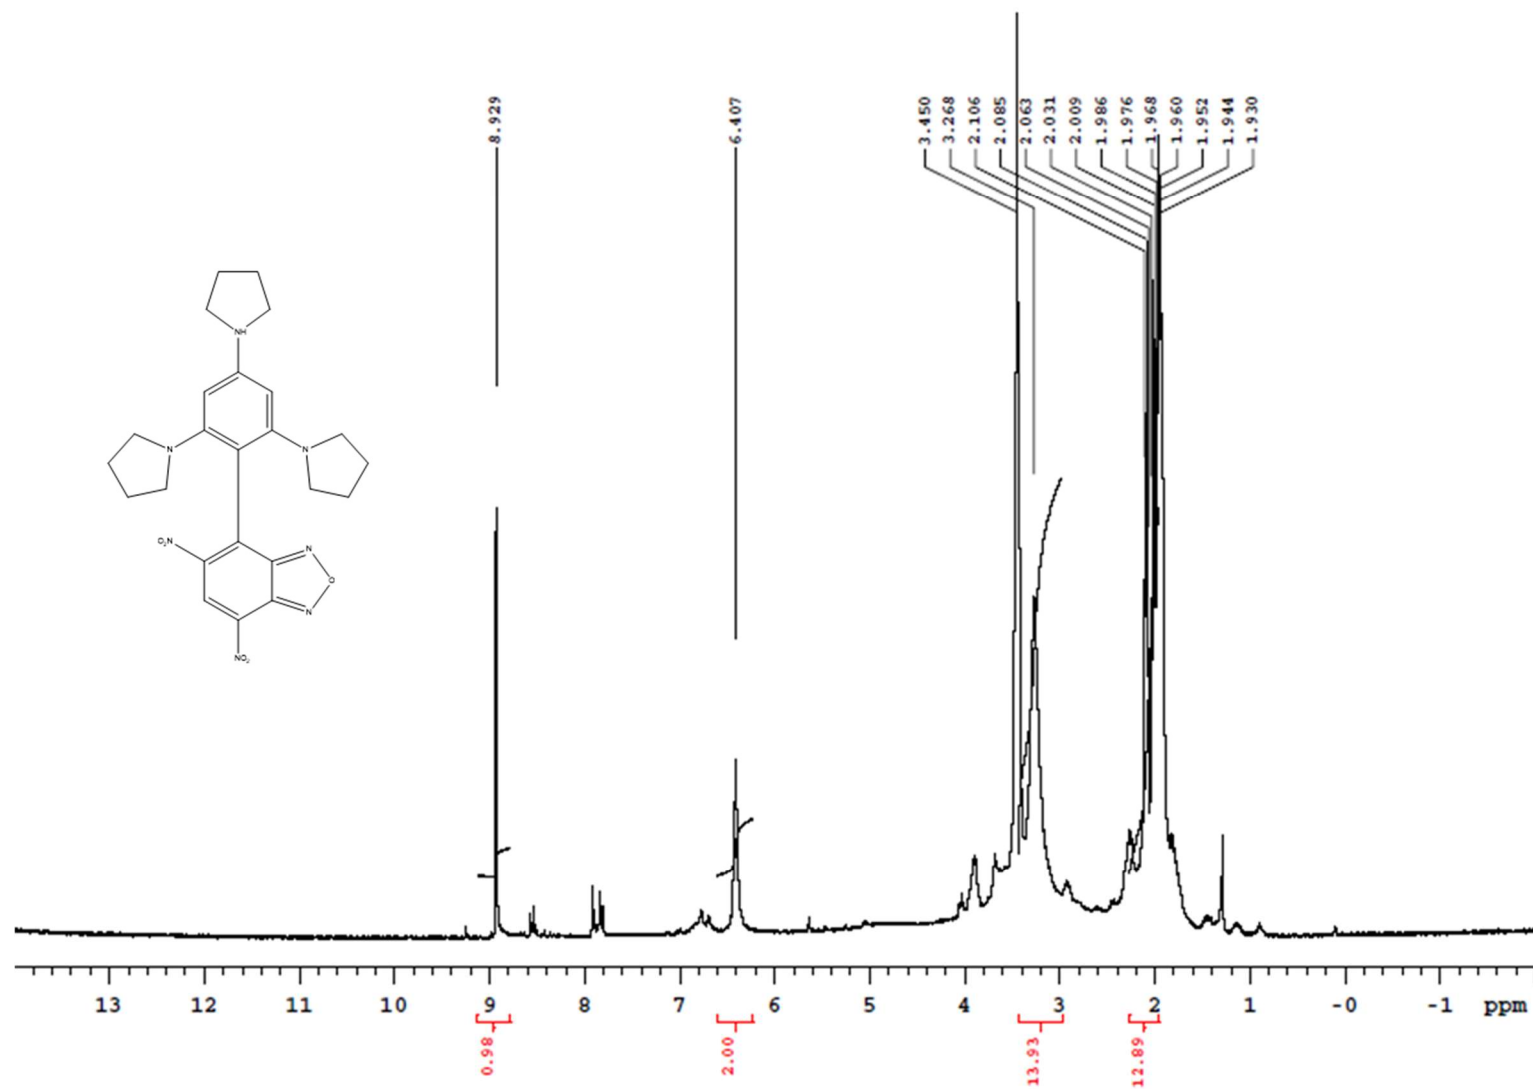

Figure SI-15. <sup>1</sup>H NMR spectrum (CD<sub>3</sub>CN, 300 MHz, 25 °C) of compound 11.



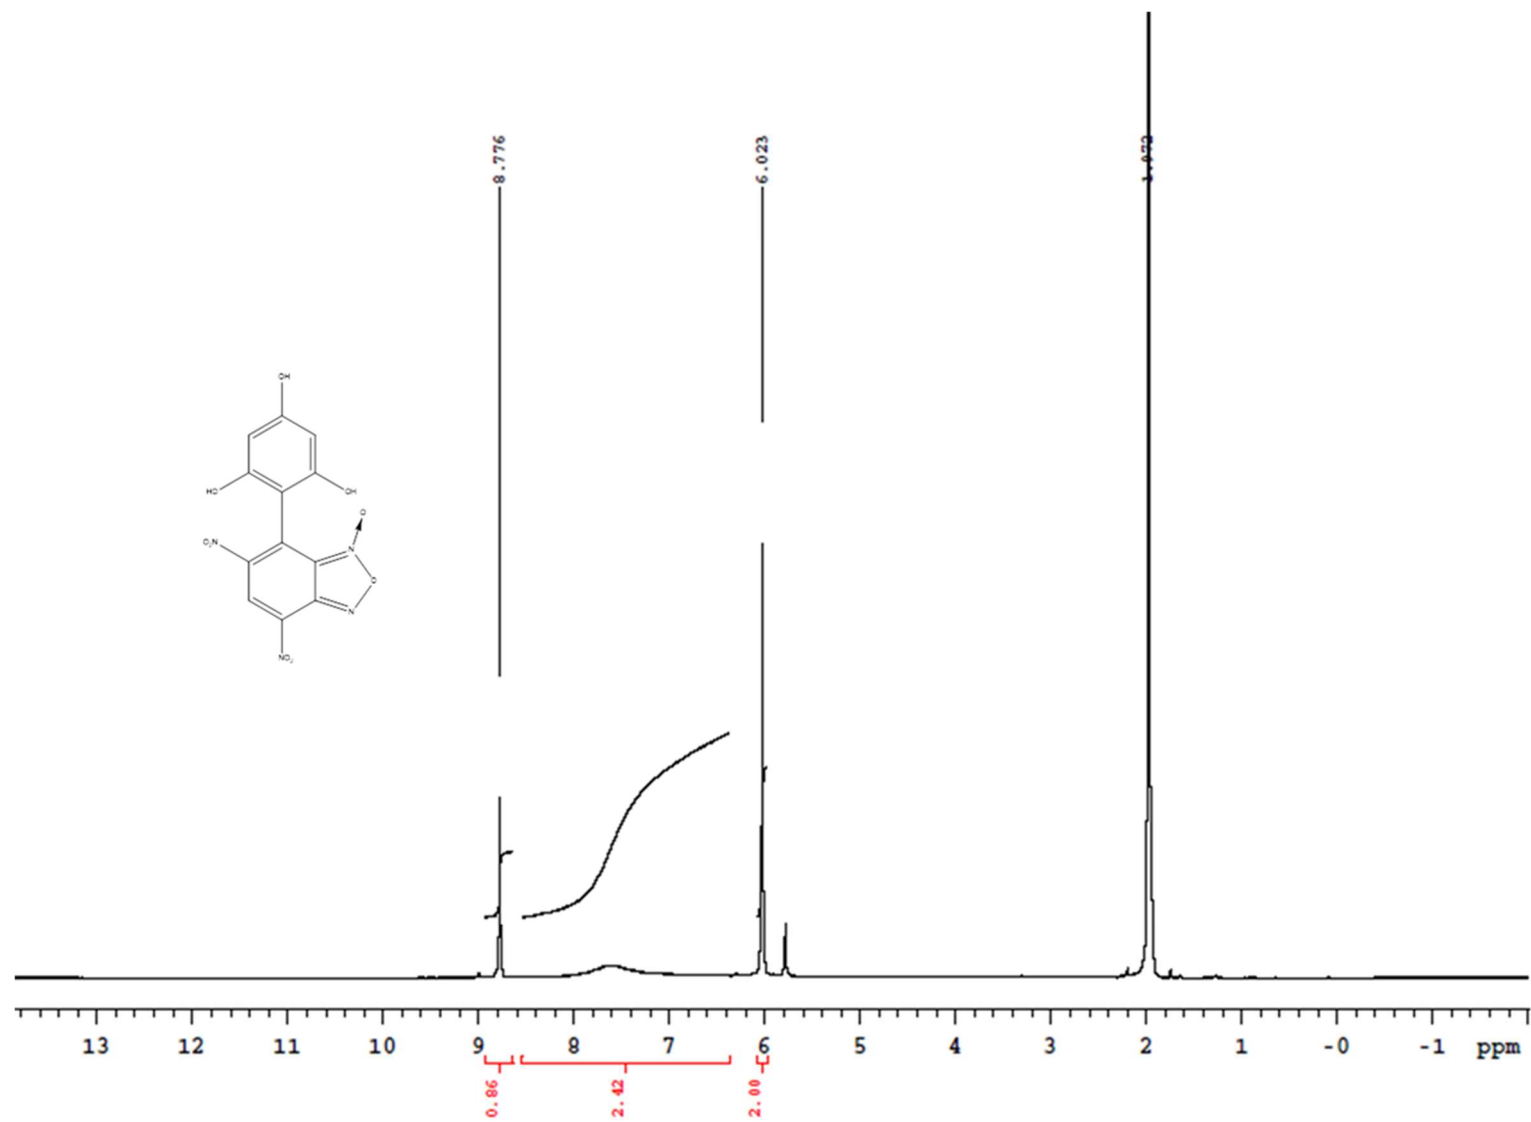

**Figure SI-16.**  $^1\text{H}$  NMR spectrum ( $\text{CD}_3\text{CN}$ , 300 MHz, 25 °C) of compound 14.

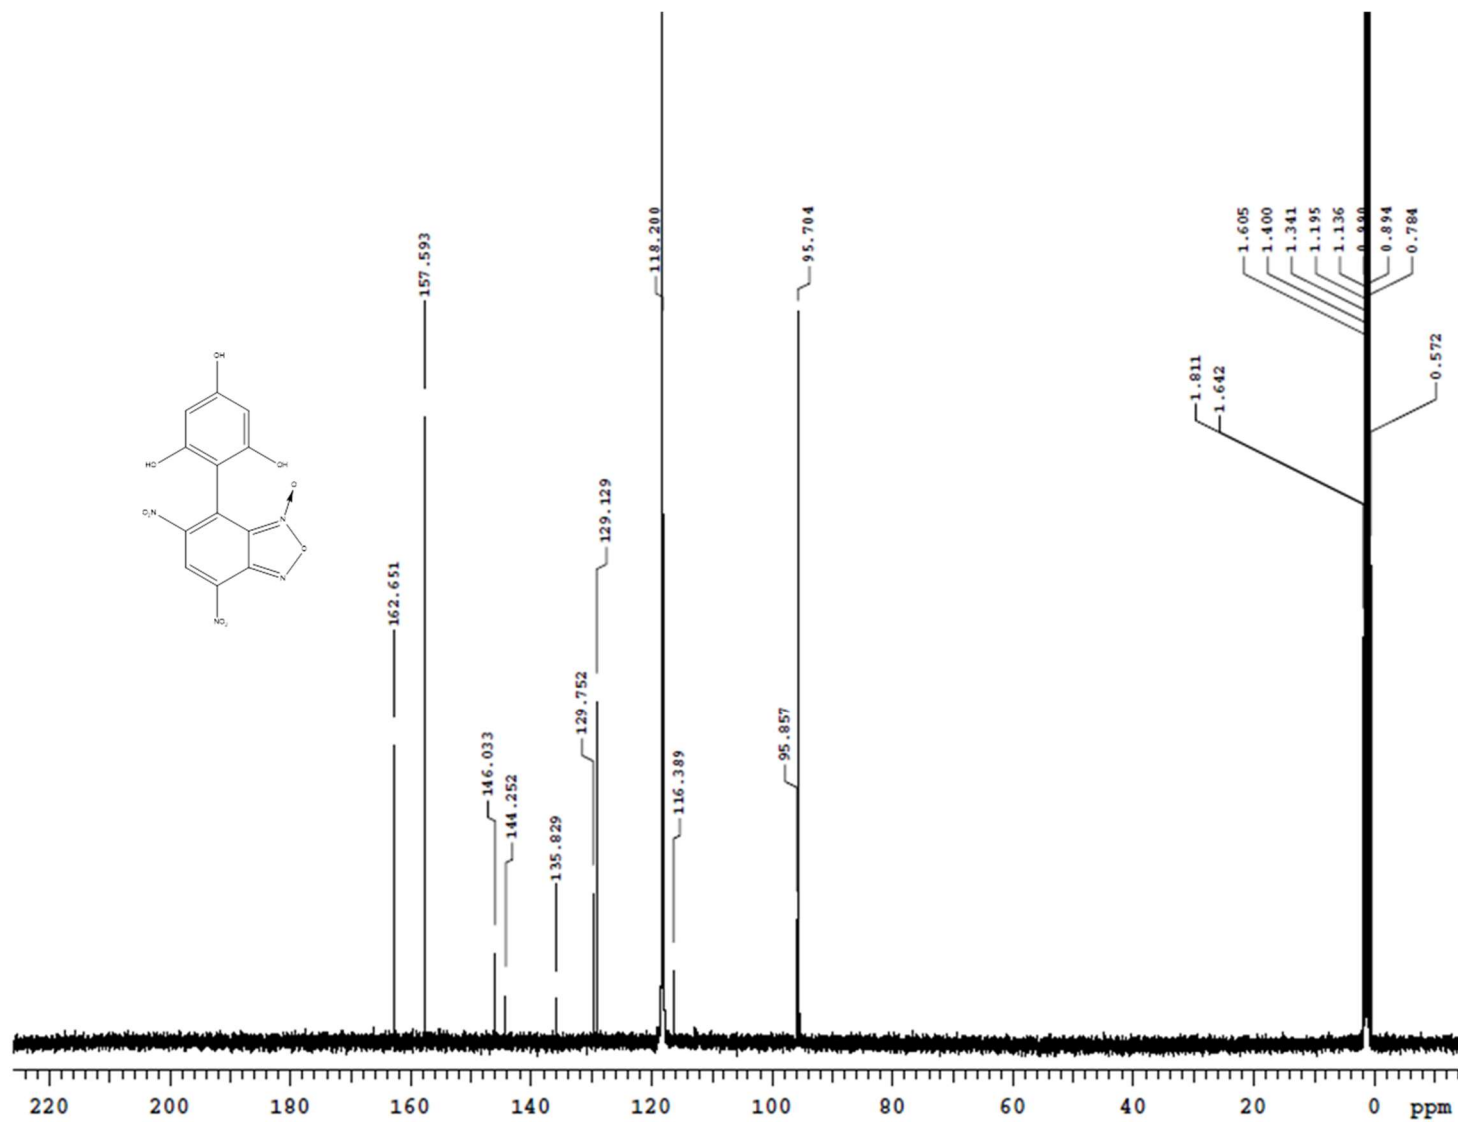

Figure SI-17.  $^1\text{H}$  NMR spectrum ( $\text{CD}_3\text{CN}$ , 100.56 MHz, 25 °C) of compound 14.

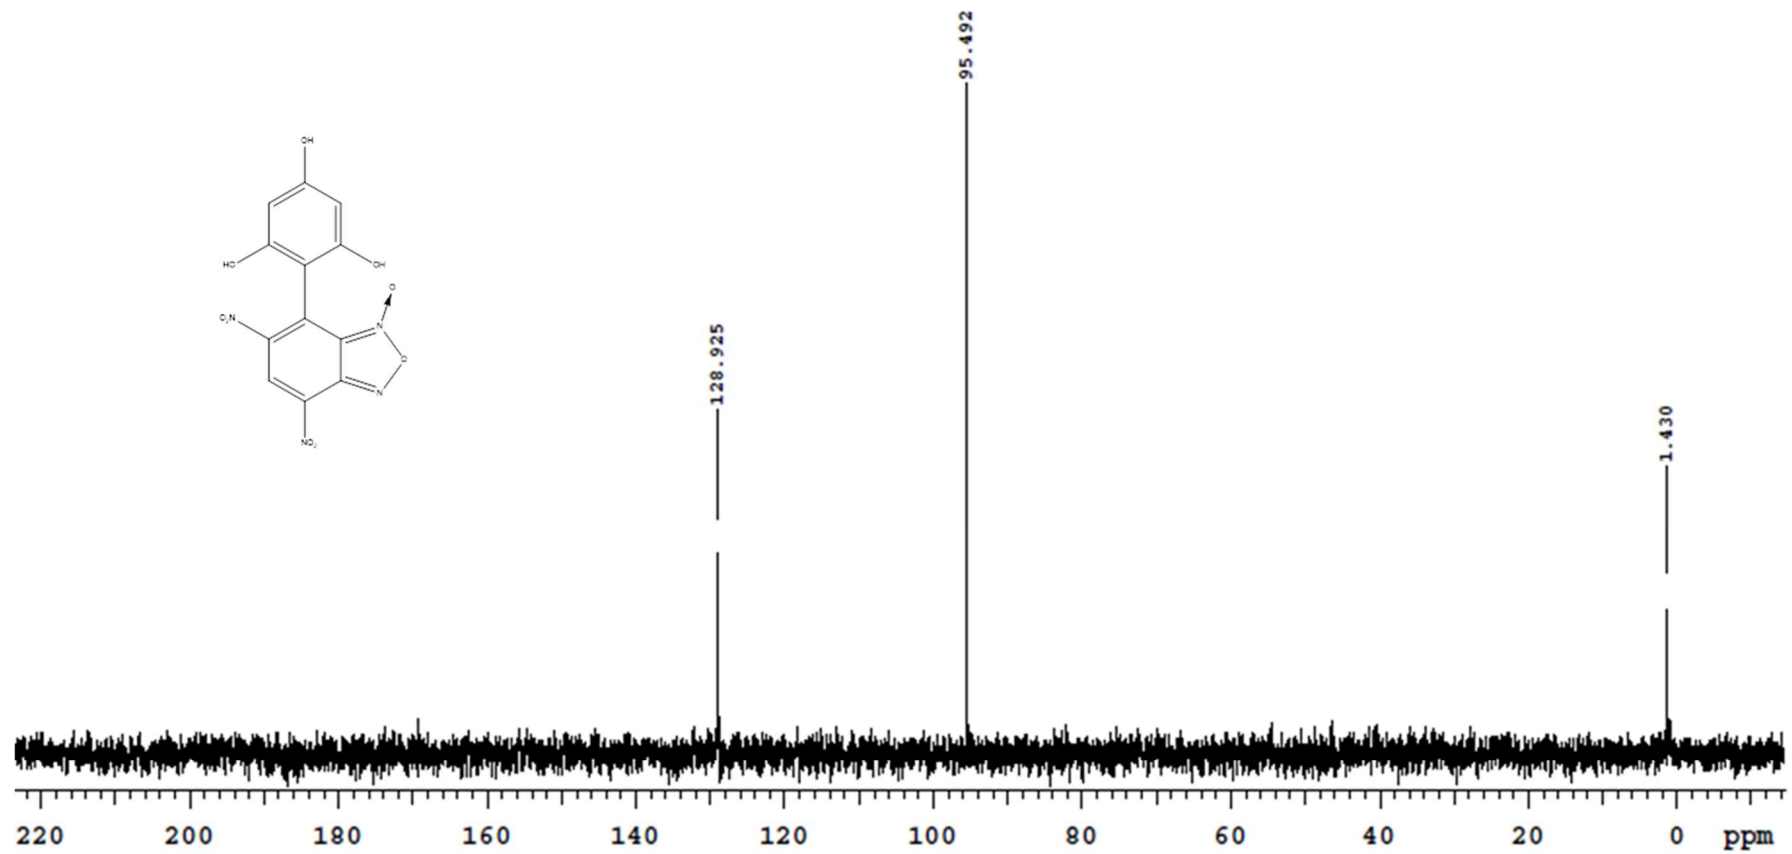

Figure SI-18. DEPT 135 spectrum (CD<sub>3</sub>CN, 100.56 MHz, 25 °C) of compound 14.

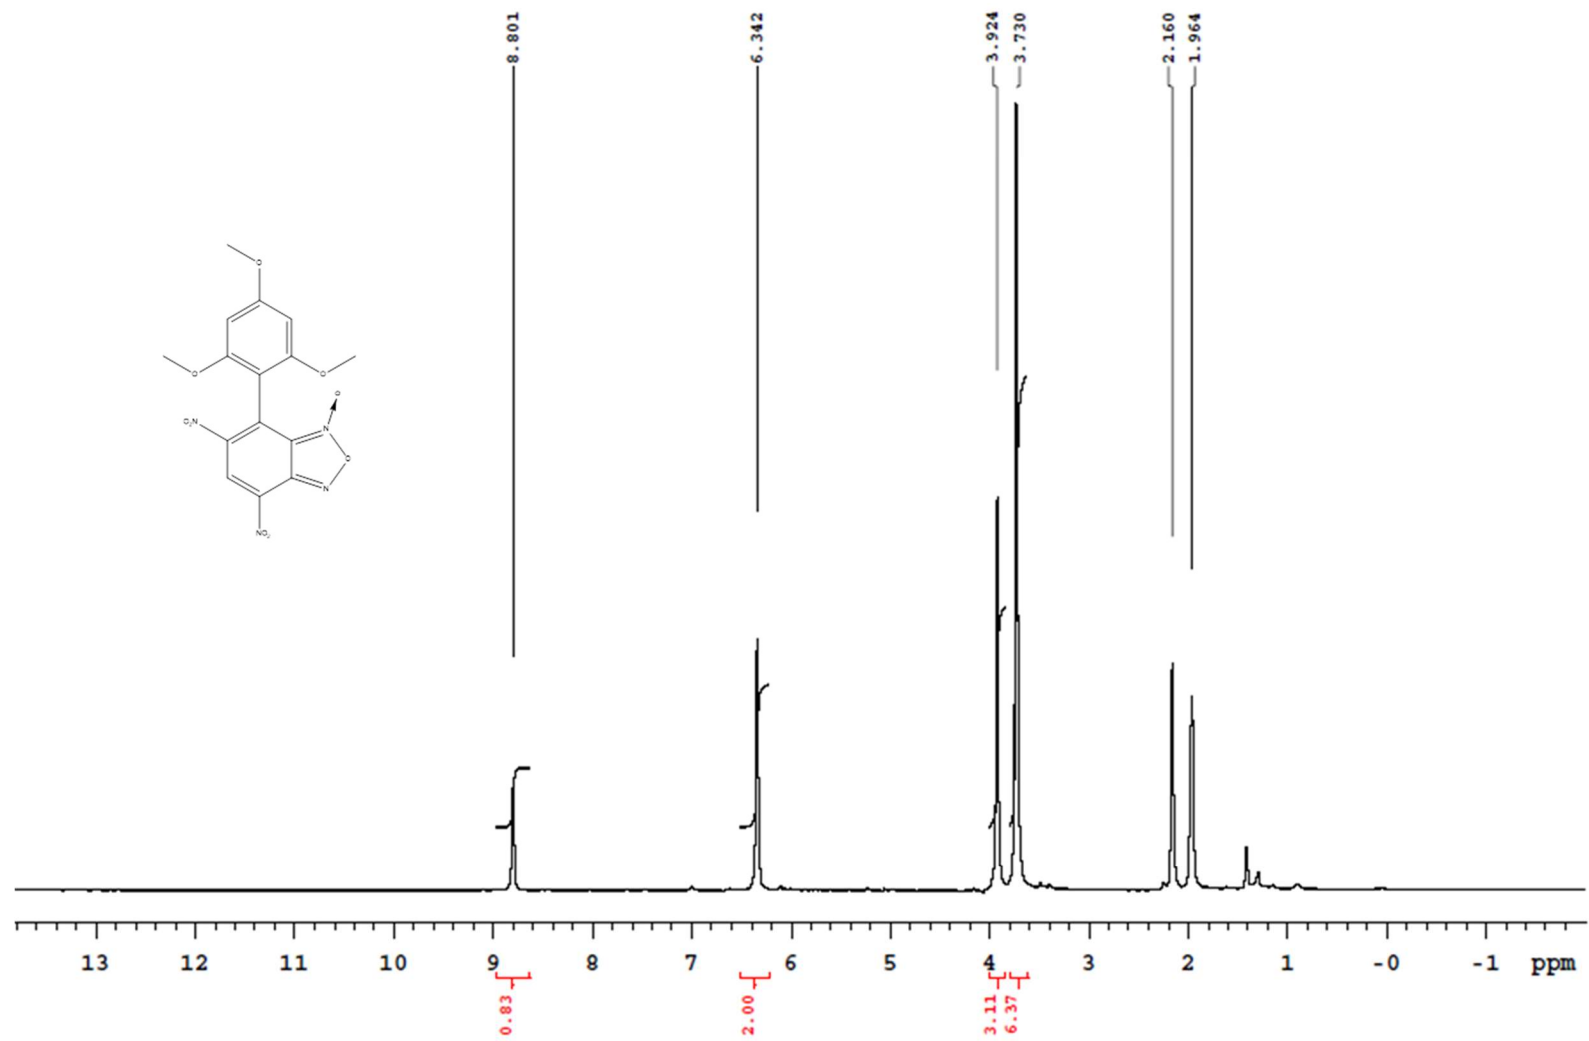

Figure SI-19. <sup>1</sup>H NMR spectrum (CD<sub>3</sub>CN, 300 MHz, 25 °C) of compound 15.

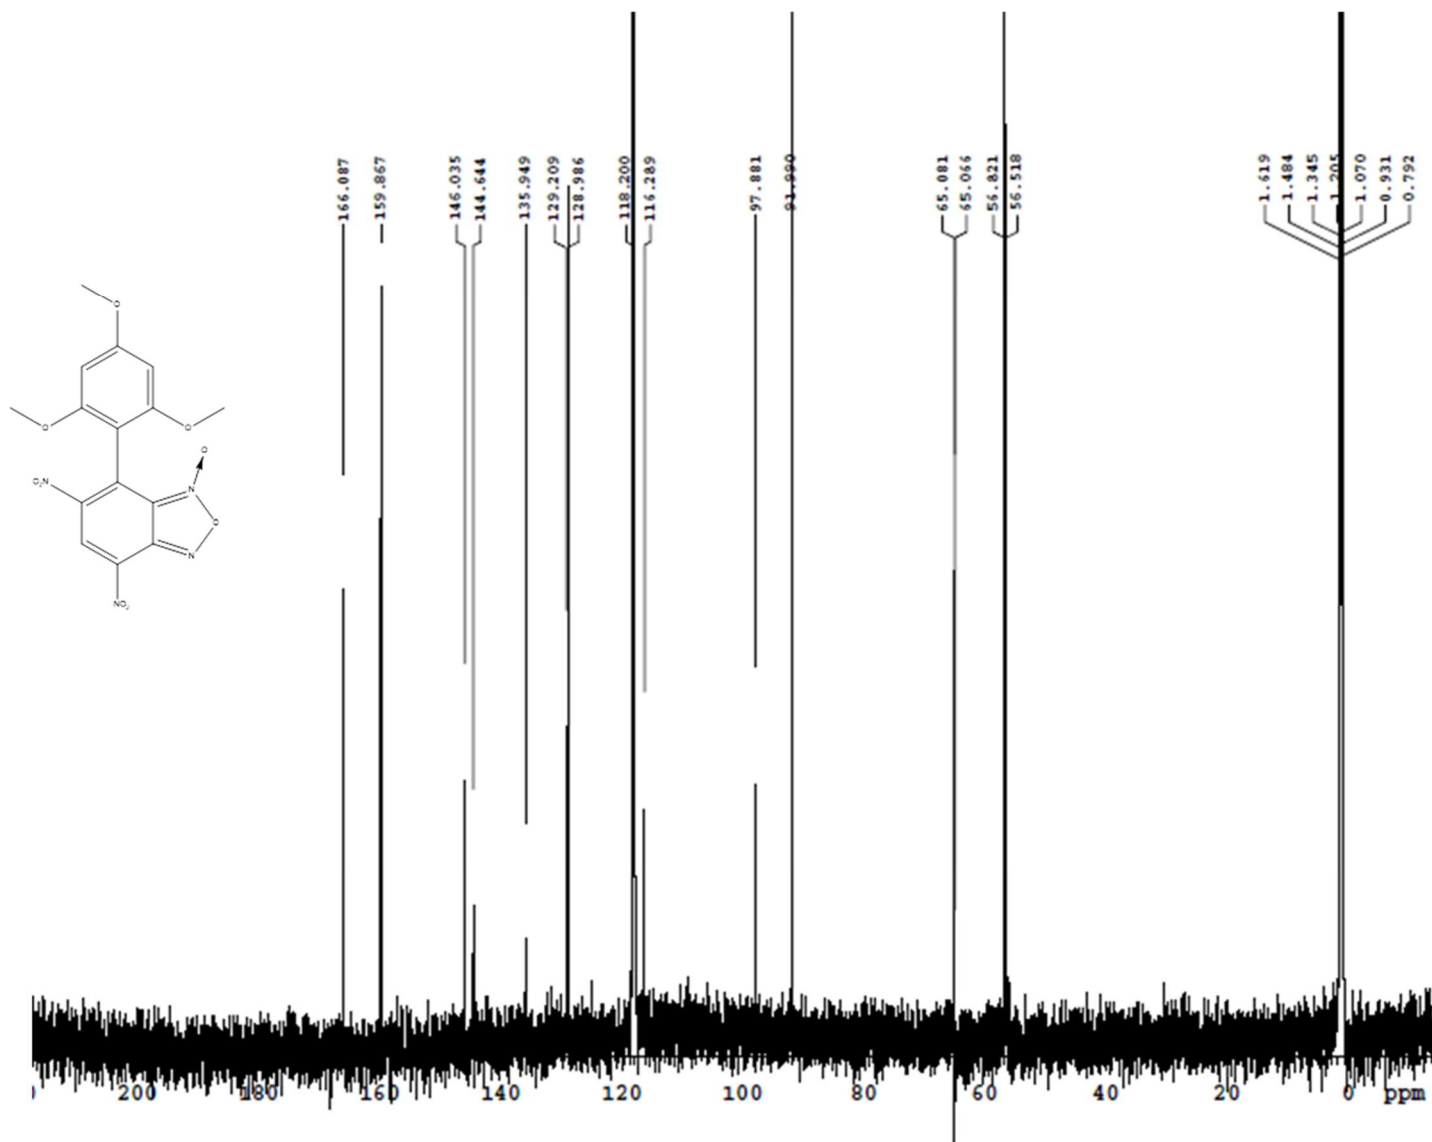

**Figure SI-20.** <sup>13</sup>C NMR spectrum (CD<sub>3</sub>CN, 150.80 MHz, 25 °C) of compound 15; signals at 65 ppm are electric spikes as can be seen in DEPT in Fig. SI-17).

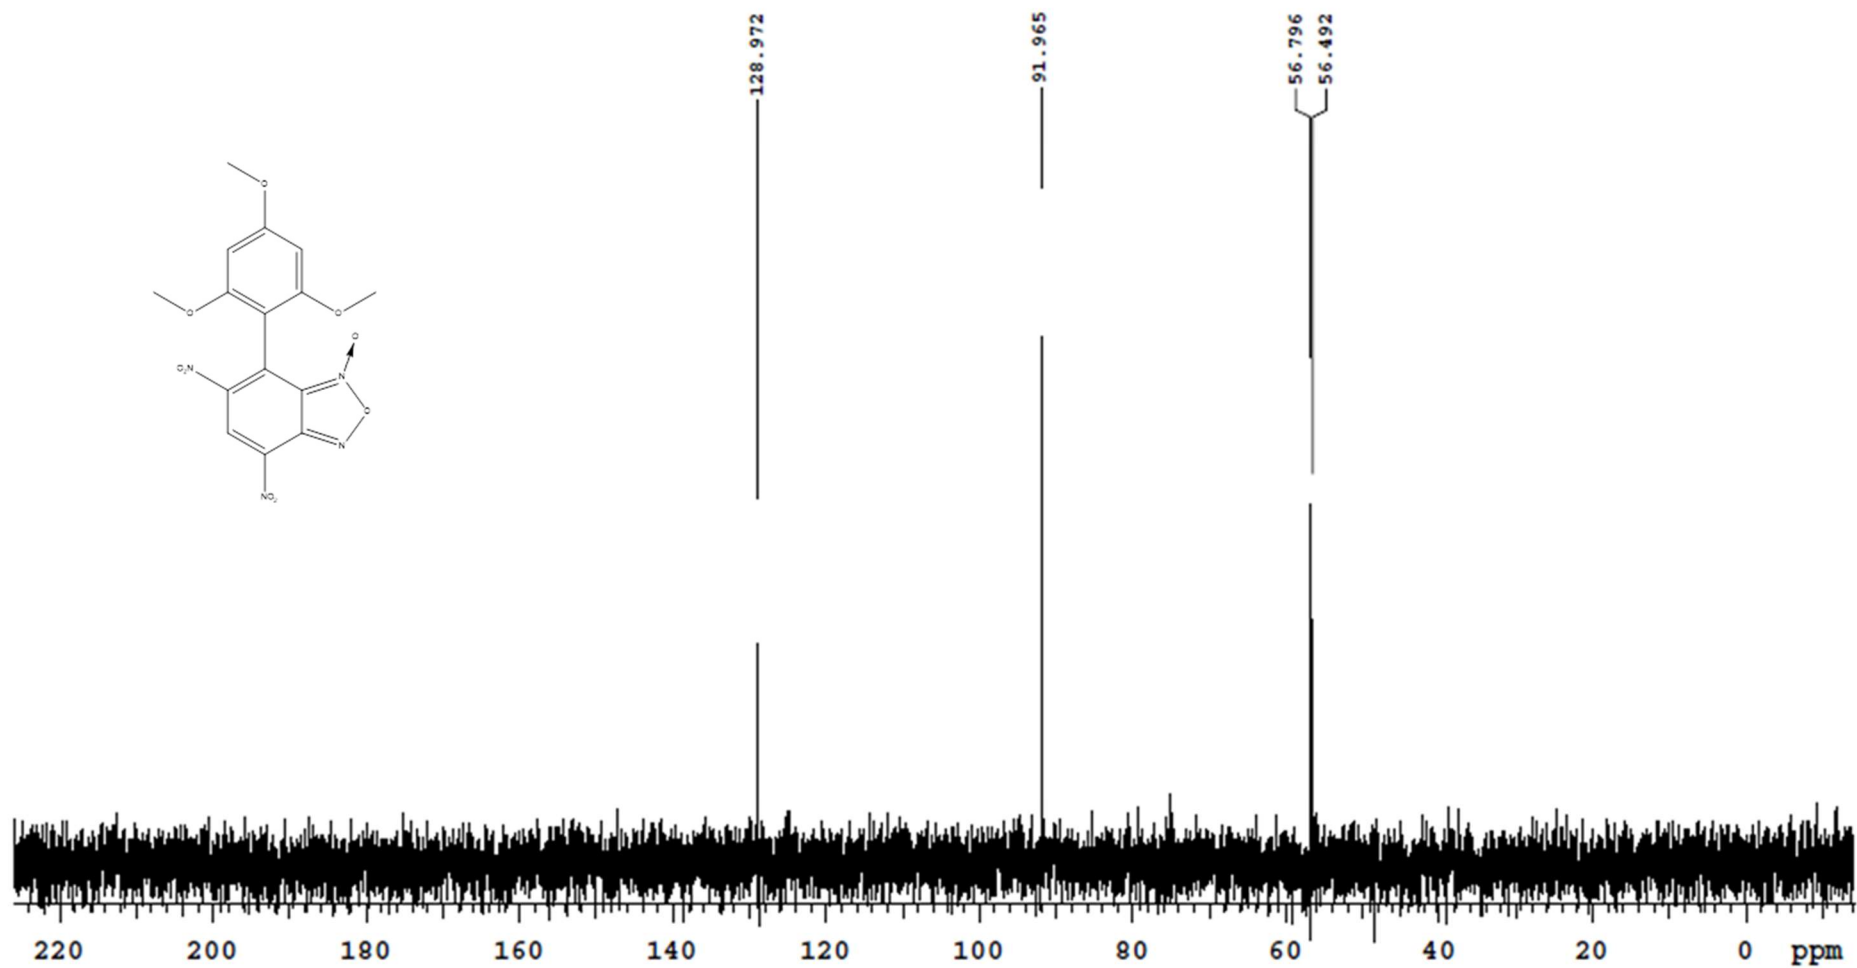

Figure SI-21. DEPT 135 spectrum (CD<sub>3</sub>CN, 150.80 MHz, 25 °C) of compound 15.

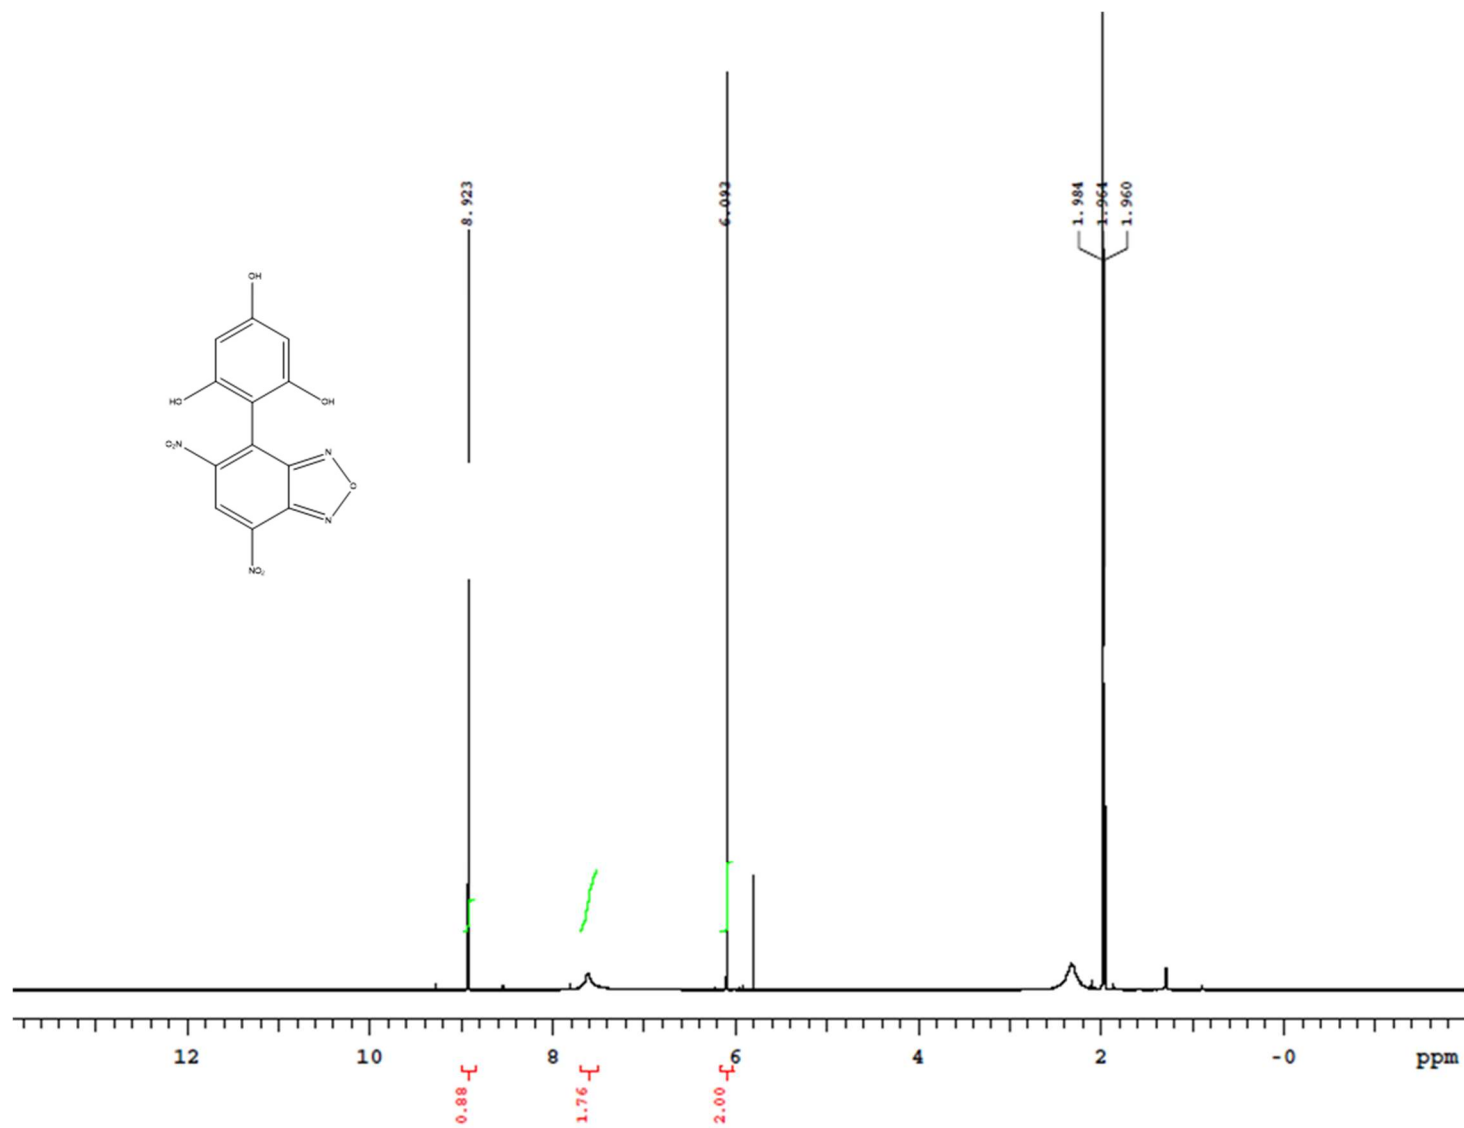

Figure SI-22. <sup>1</sup>H NMR spectrum (CD<sub>3</sub>CN, 600 MHz, 25 °C) of compound 16.

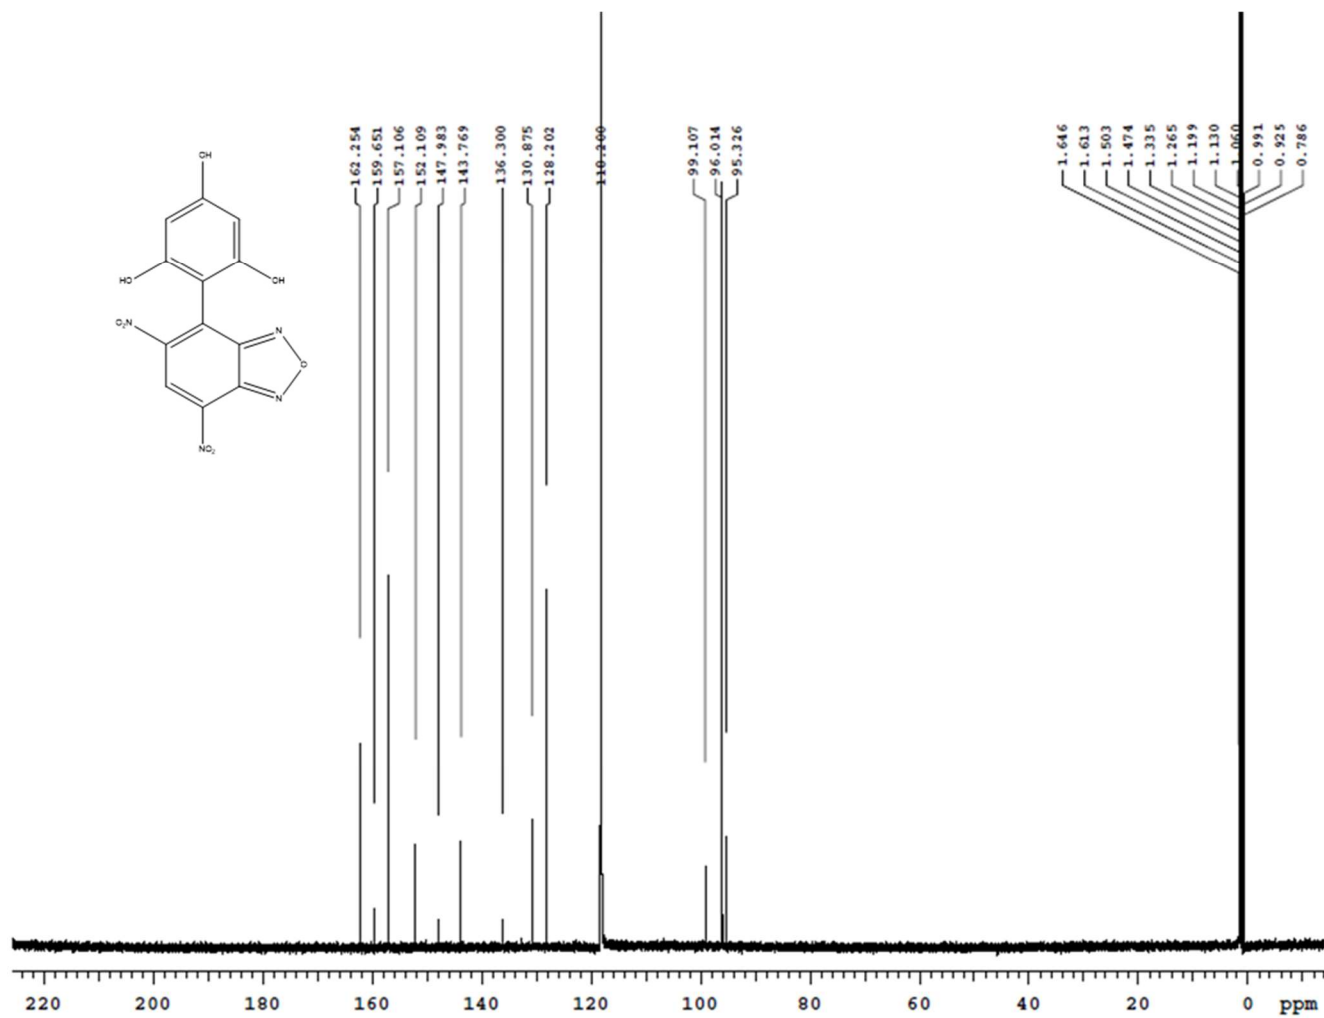

**Figure SI-23.** <sup>13</sup>C NMR spectrum (CD<sub>3</sub>CN, 150.80 MHz, 25 °C) of compound **16**; peaks at 159.7 and 95.3 ppm belong to phloroglucinol.



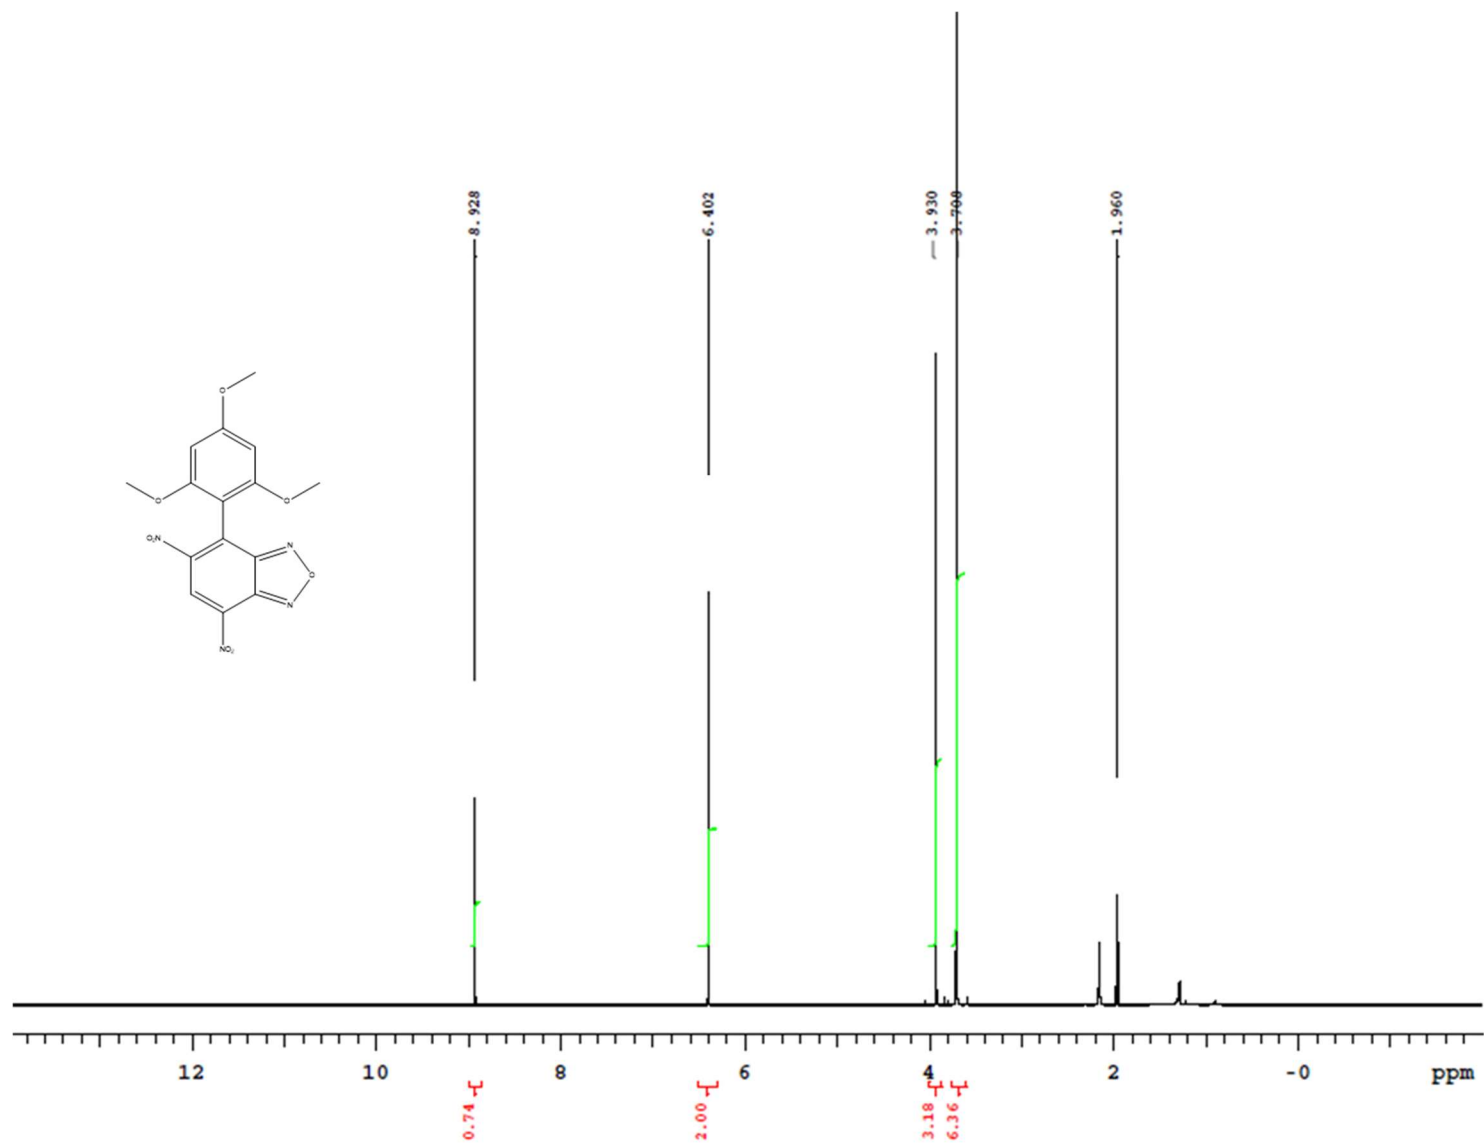

Figure SI-24. <sup>1</sup>H NMR spectrum (CD<sub>3</sub>CN, 600 MHz, 25 °C) of compound 17.

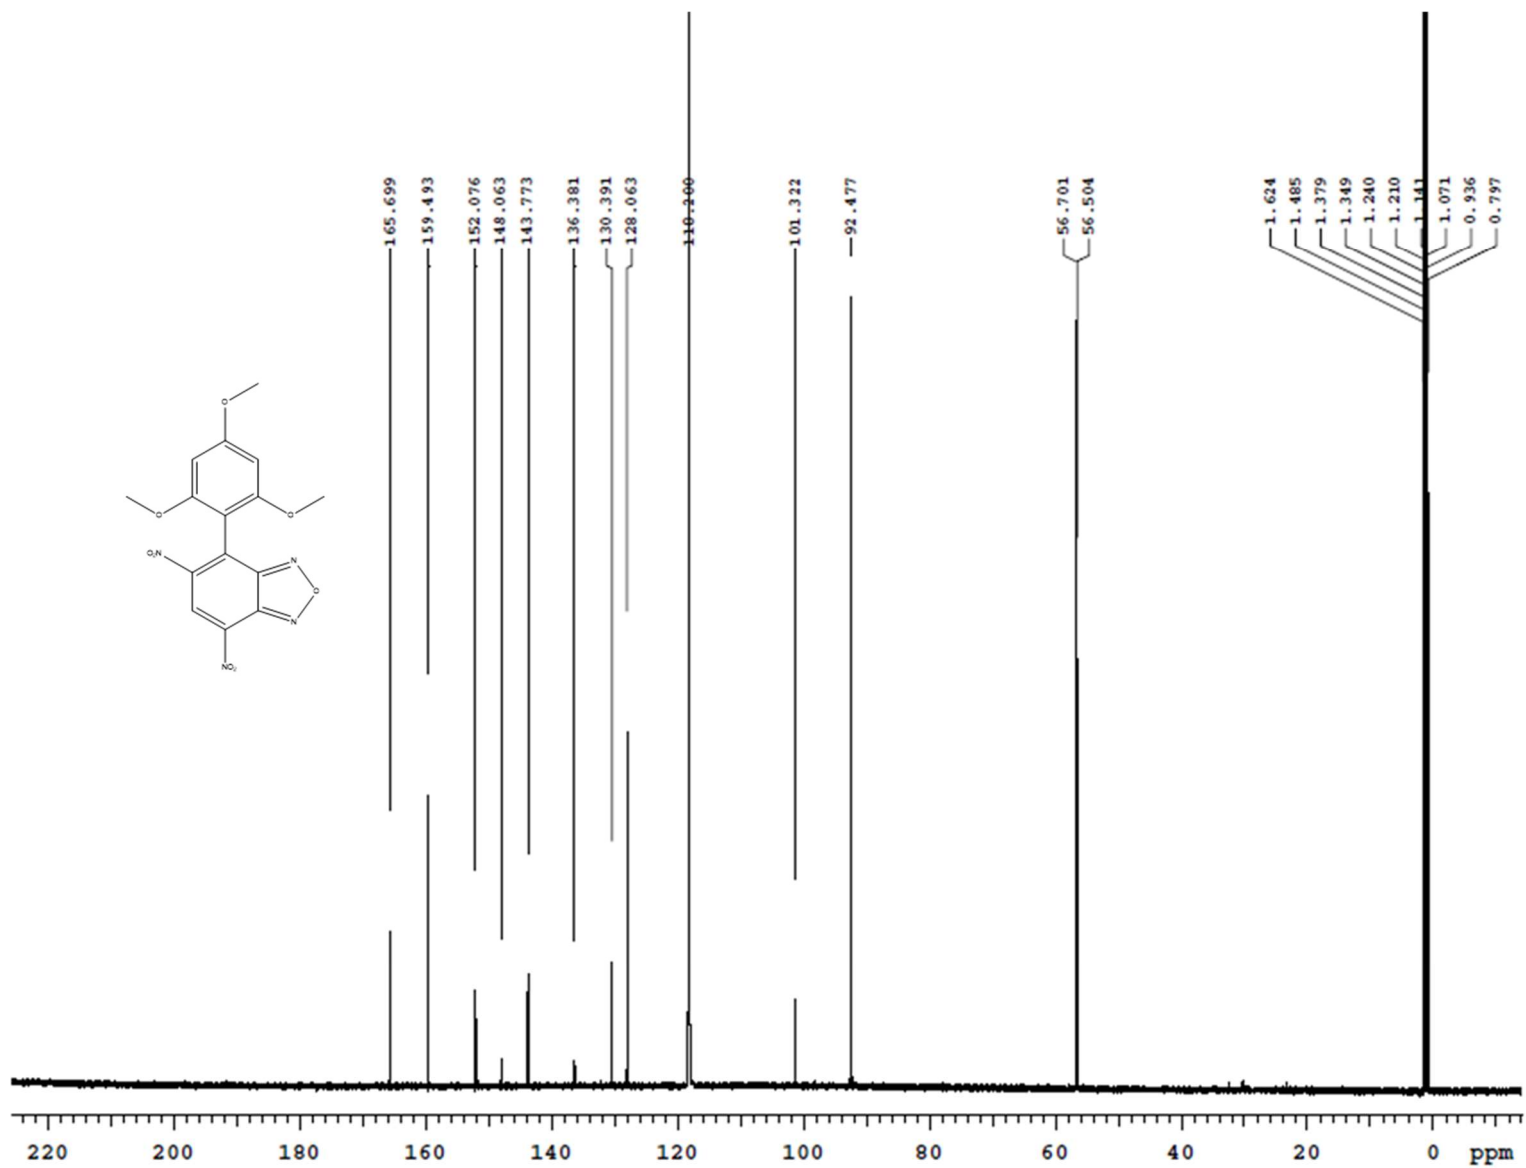

Figure SI-25. <sup>13</sup>C NMR spectrum (CD<sub>3</sub>CN, 150.80 MHz, 25 °C) of compound 17

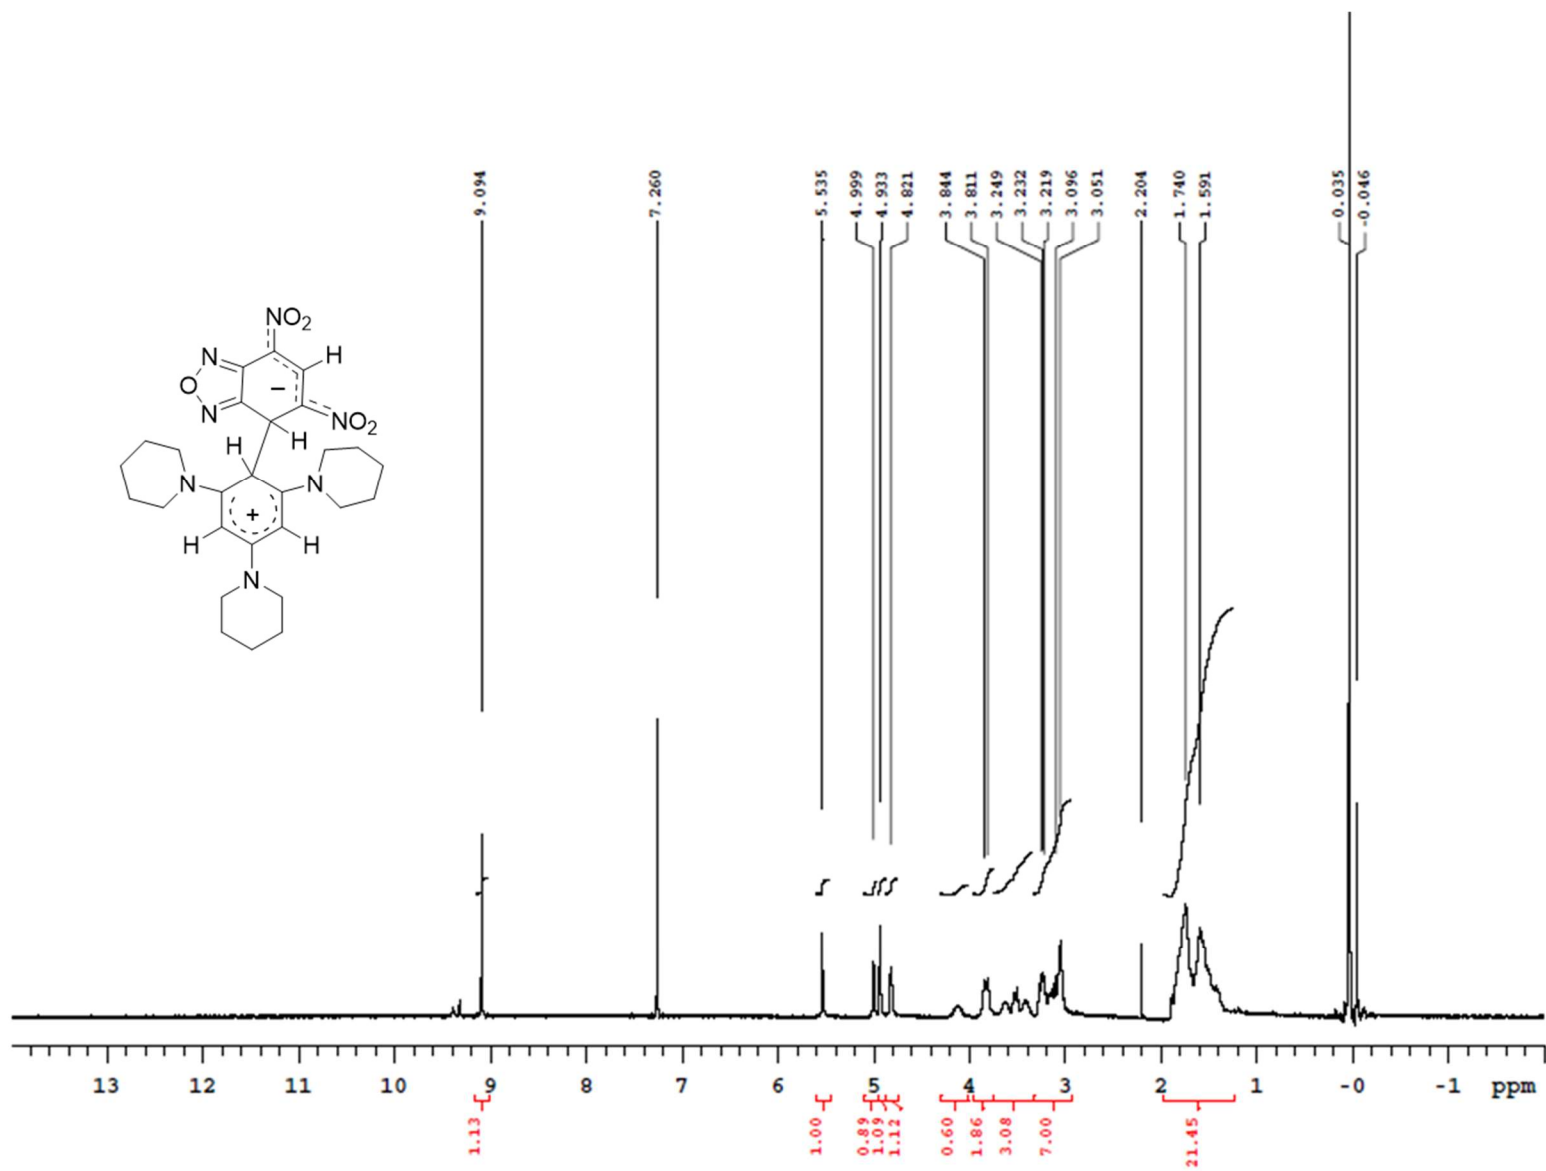

Figure SI-26. <sup>1</sup>H NMR spectrum (CDCl<sub>3</sub>, 400 MHz, -60 °C) of compound WM1

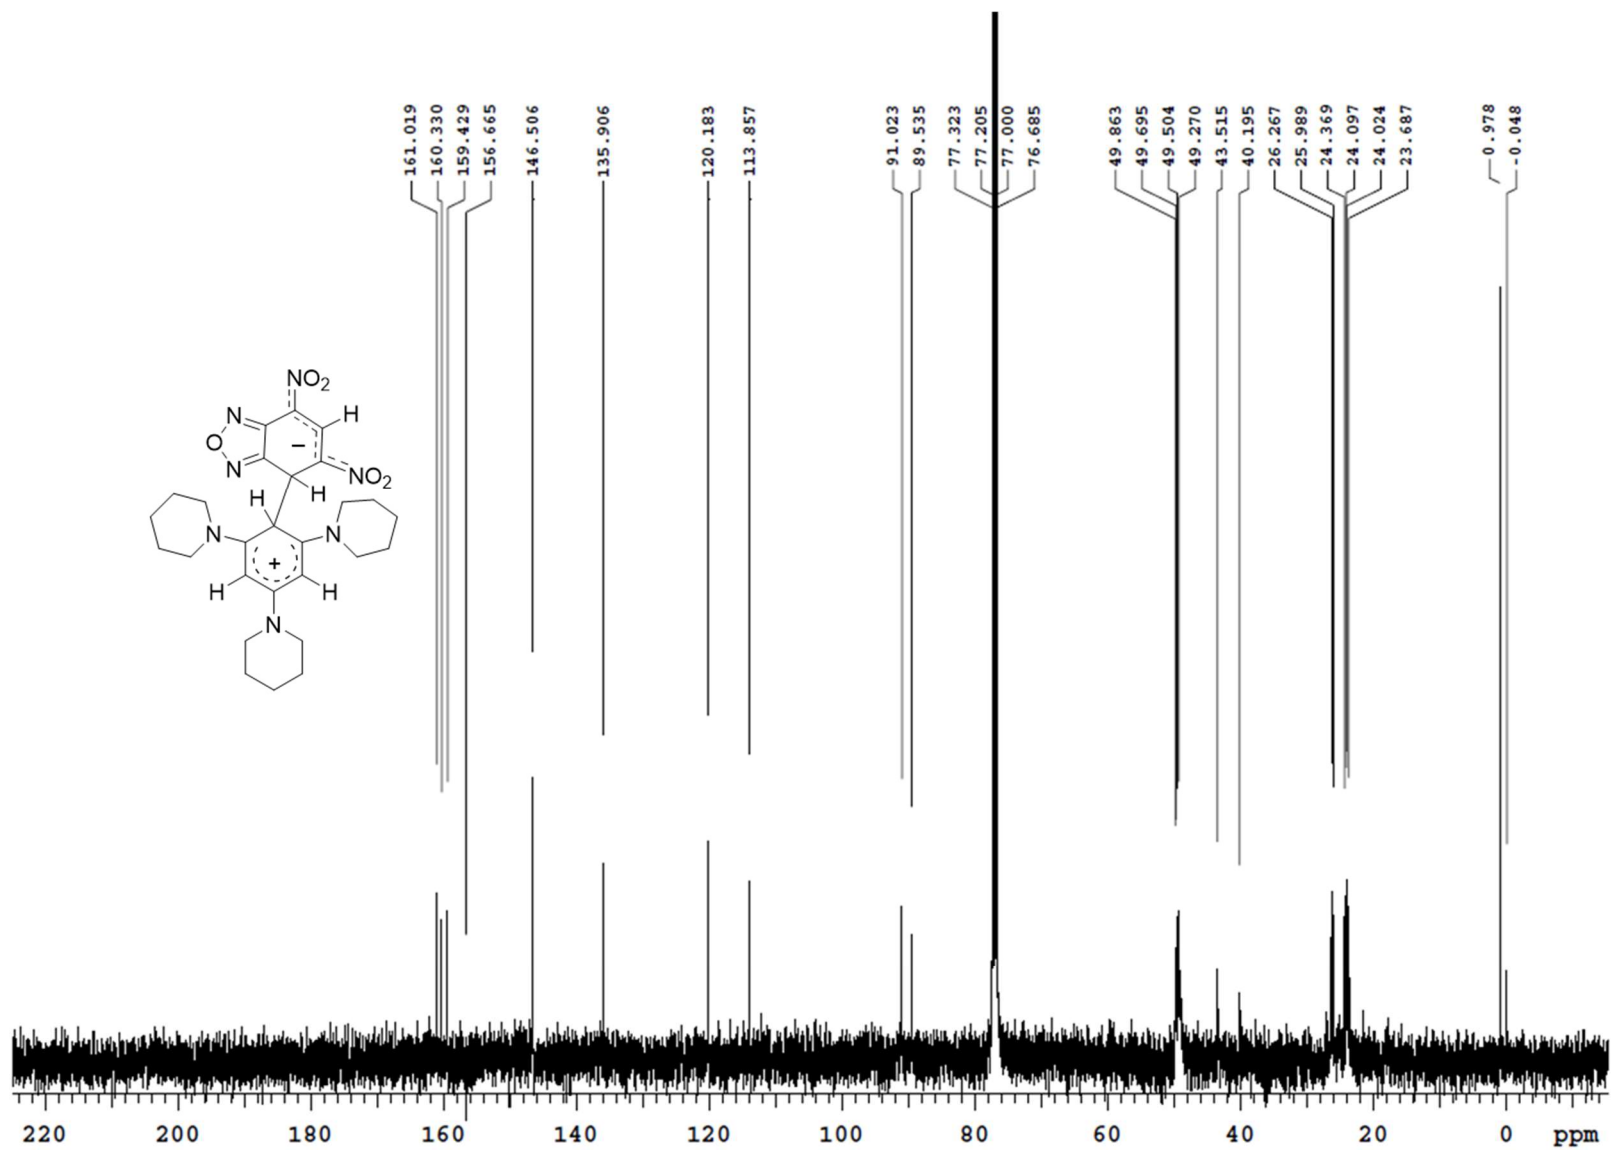

**Figure SI-27.**  $^{13}\text{C}$  NMR spectrum ( $\text{CDCl}_3$ , 100.6 MHz,  $-43^\circ\text{C}$ ) of compound **WM1**

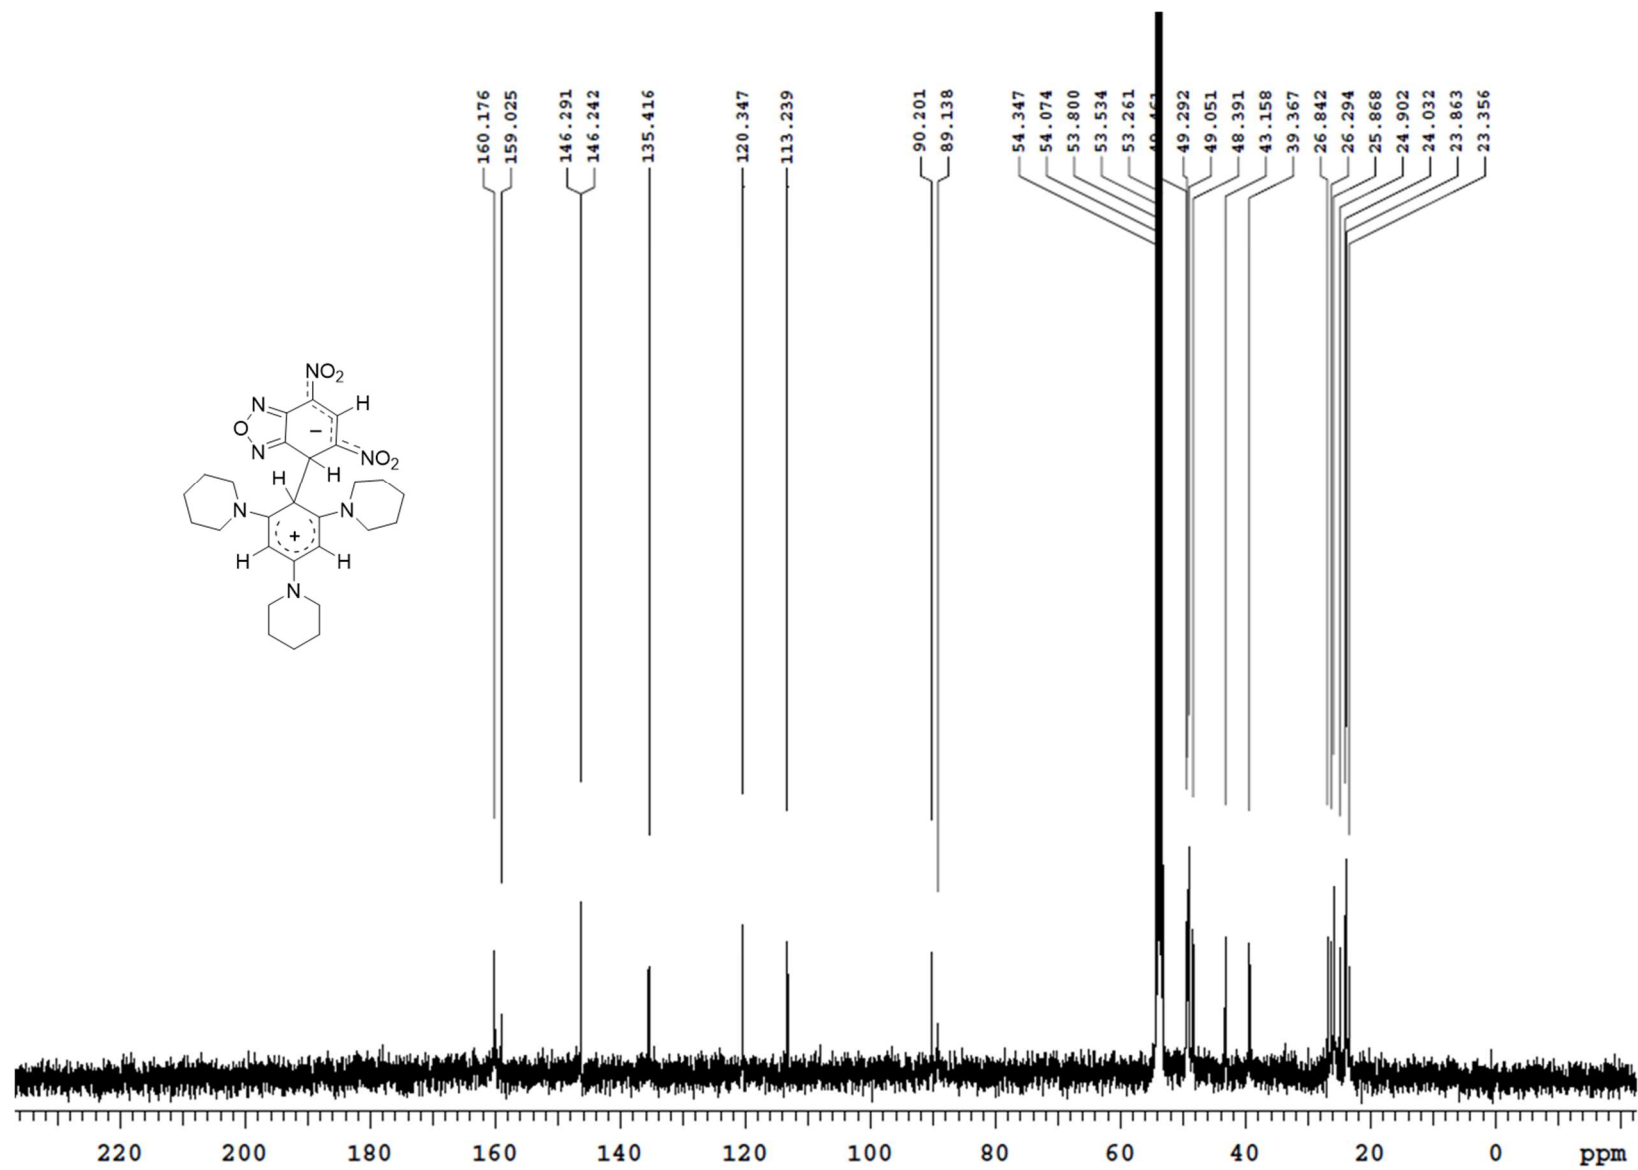

Figure SI-28. <sup>13</sup>C NMR spectrum (CD<sub>2</sub>Cl<sub>2</sub>, 100.6 MHz, -80 °C) of compound WM1

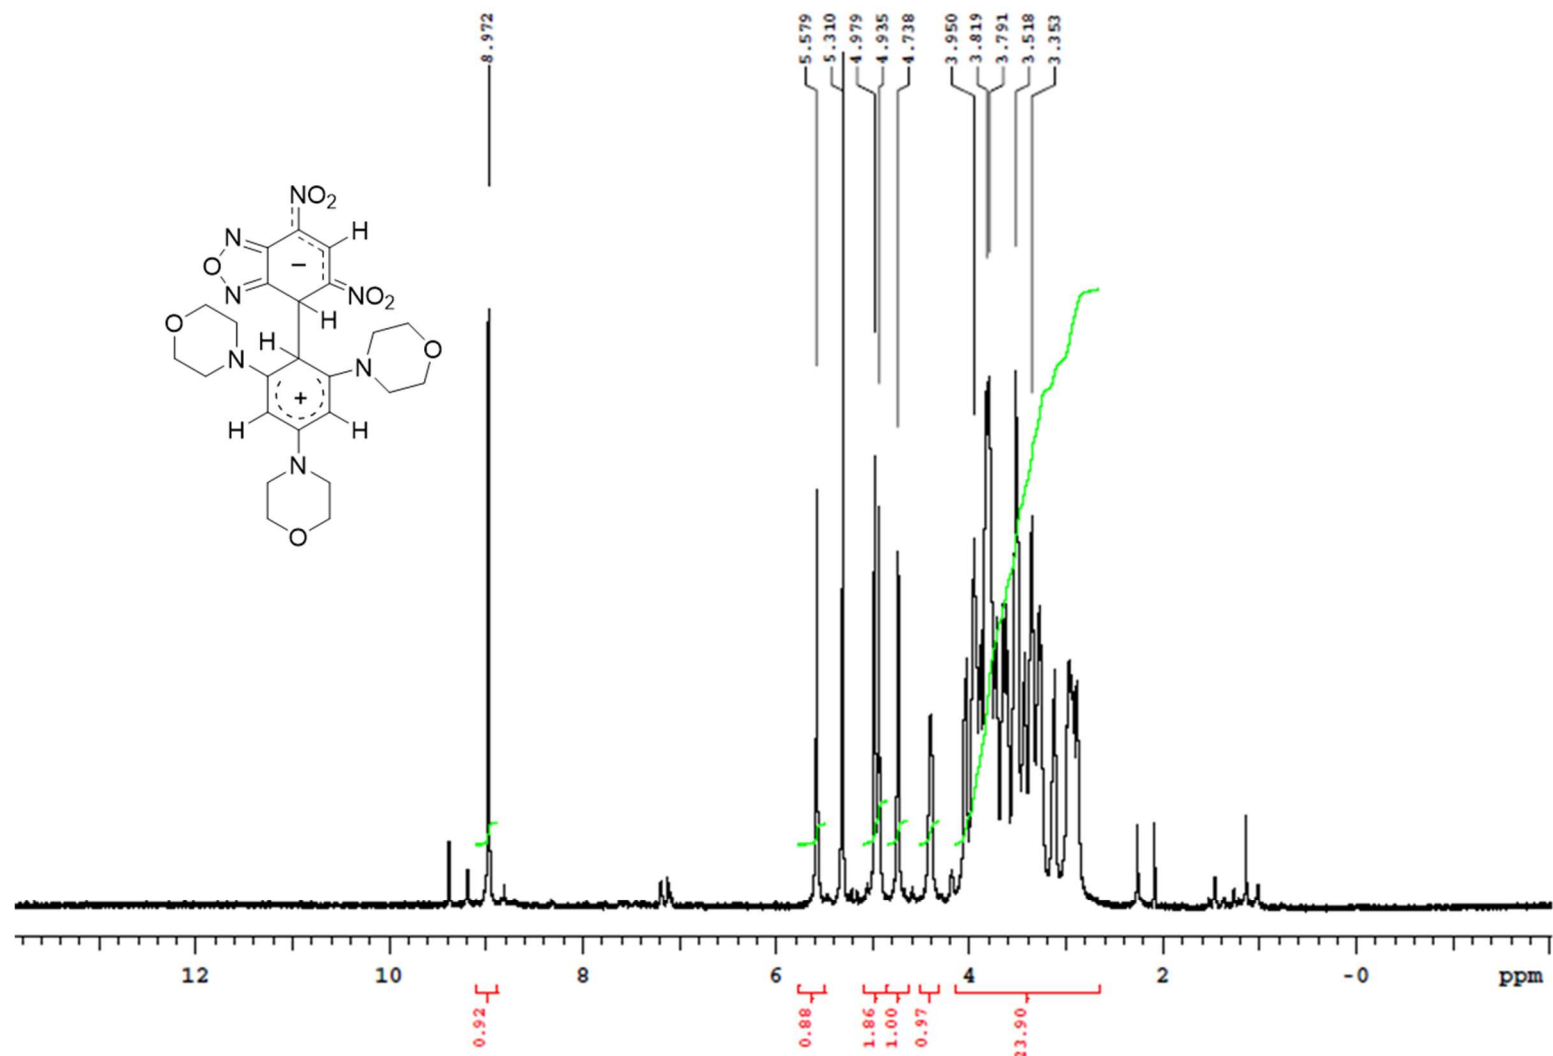

Figure SI-29. <sup>1</sup>H NMR spectrum (CDCl<sub>3</sub>, 400 MHz, -60 °C) of compound WM2

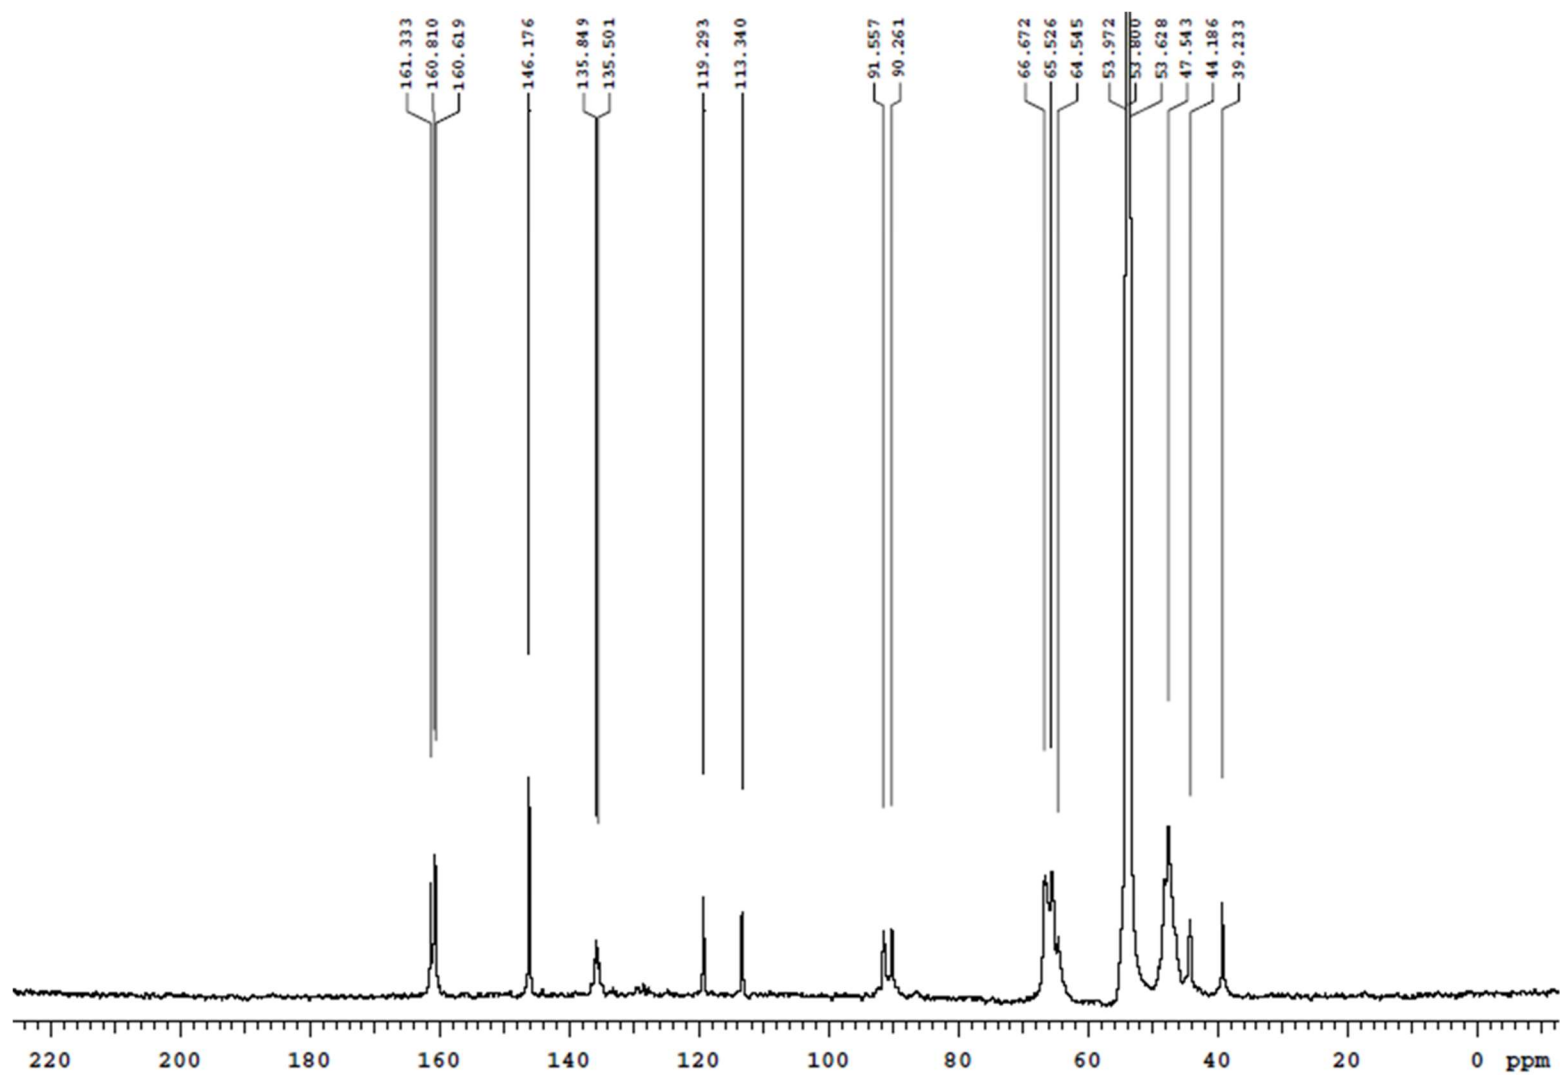

**Figure SI-30.**  $^{13}\text{C}$  NMR spectrum ( $\text{CD}_2\text{Cl}_2$ , 100.6 MHz,  $-80\text{ }^\circ\text{C}$ ) of compound **WM2**

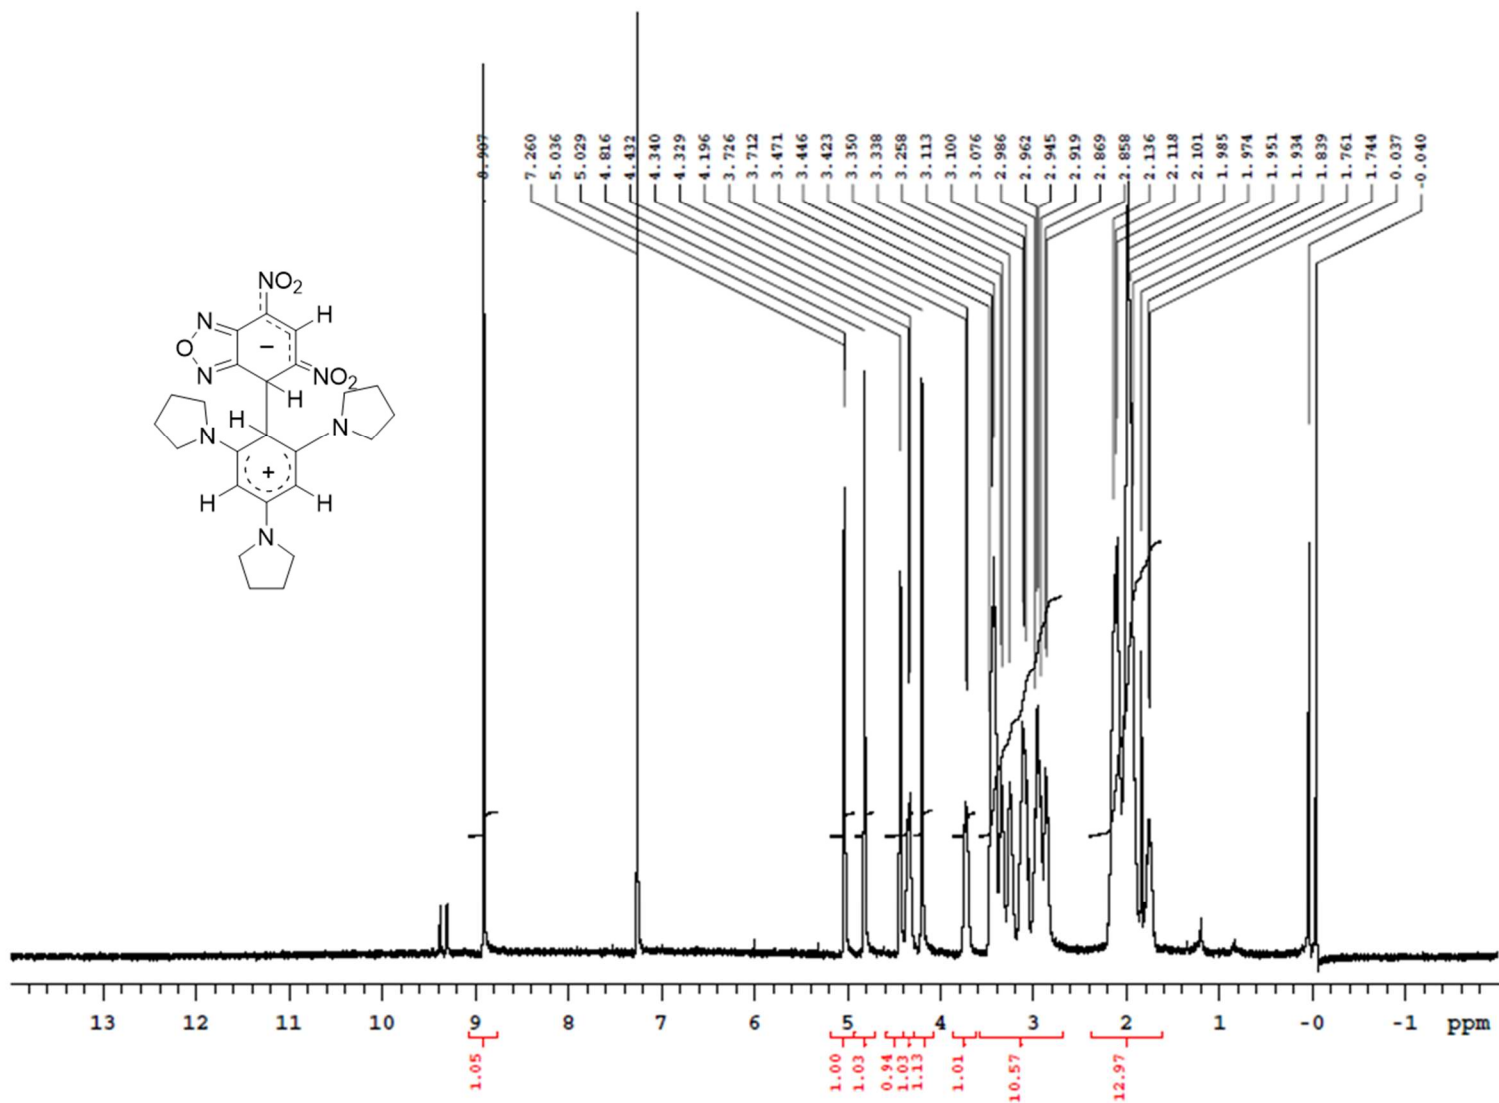

Figure SI-31. <sup>1</sup>H NMR spectrum (CDCl<sub>3</sub>, 400 MHz, -37 °C) of compound WM3



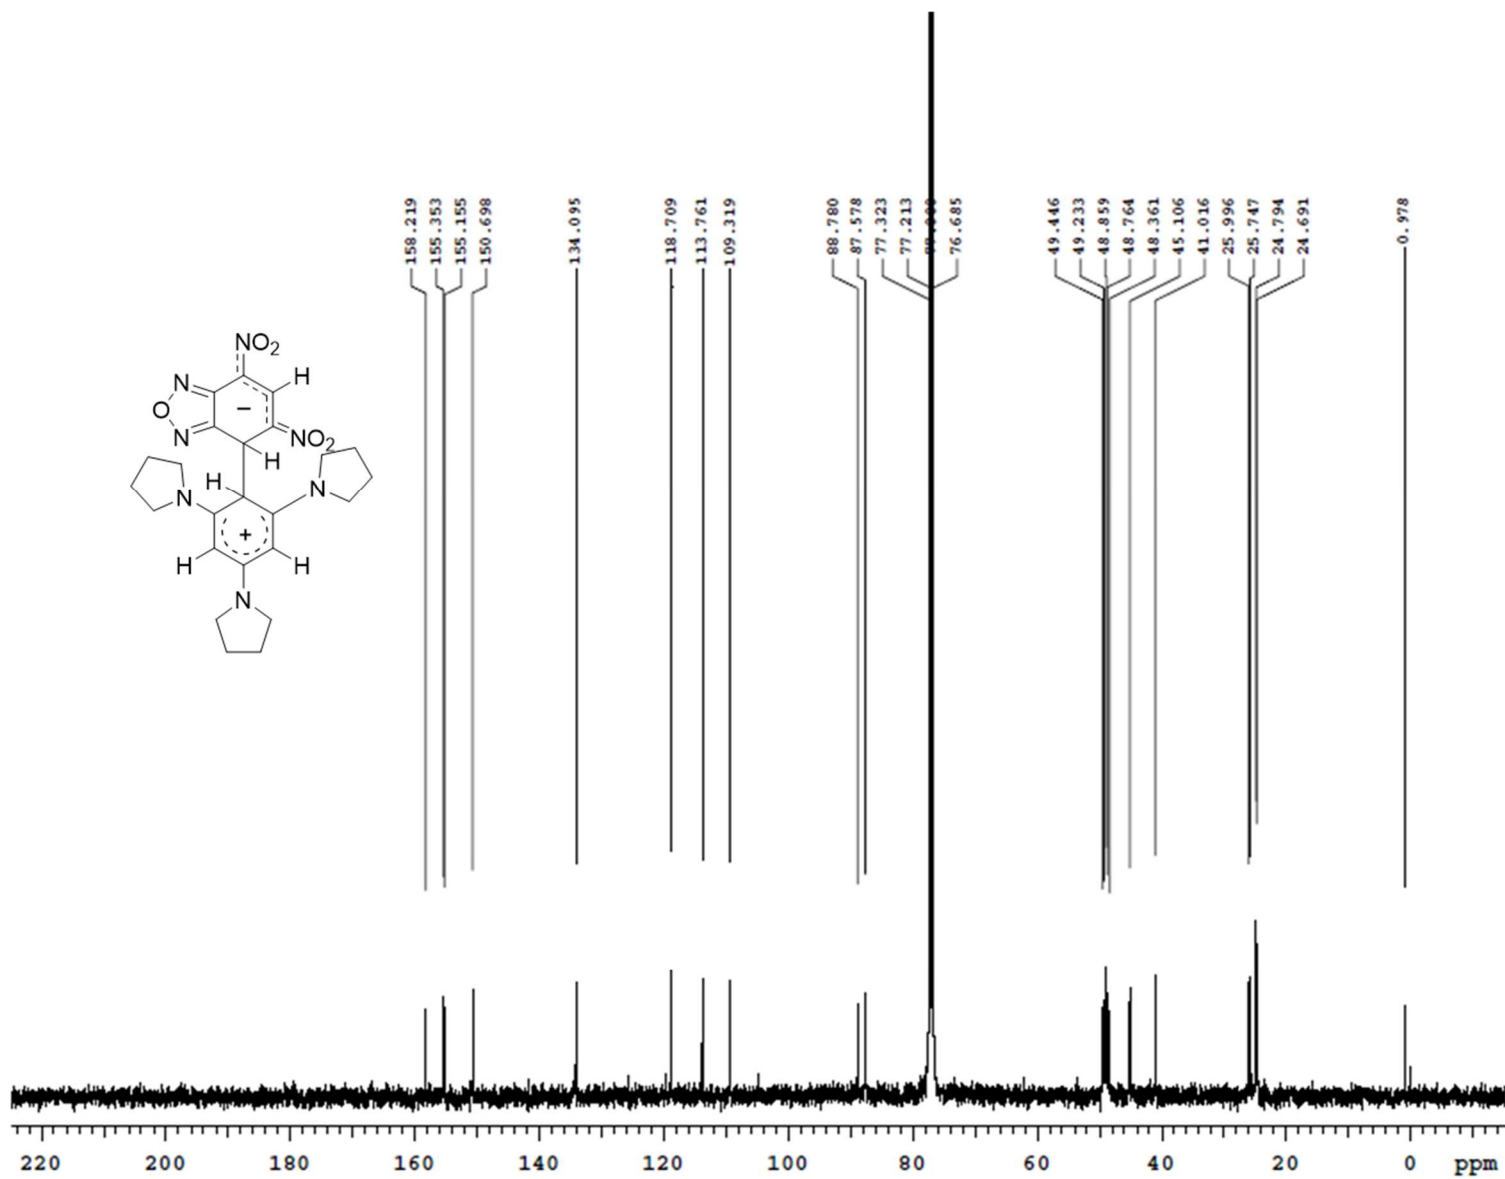

Figure SI-32.  $^{13}\text{C}$  NMR spectrum ( $\text{CDCl}_3$ , 100.6 MHz,  $-37\text{ }^\circ\text{C}$ ) of compound WM3

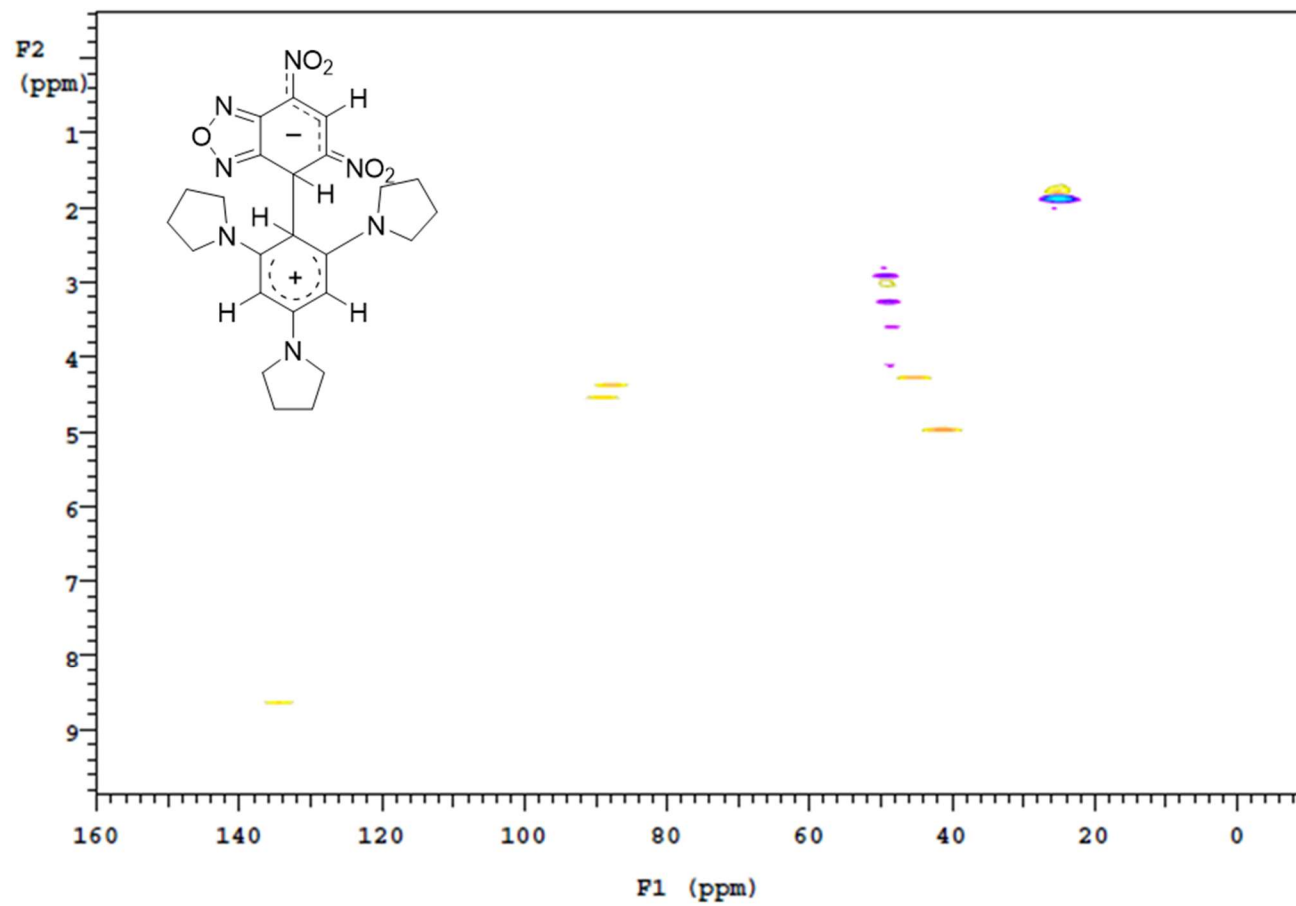

Figure SI-33. g-HSQC spectrum ( $\text{CDCl}_3$ , 100.6 MHz,  $-37^\circ\text{C}$ ) of compound WM3

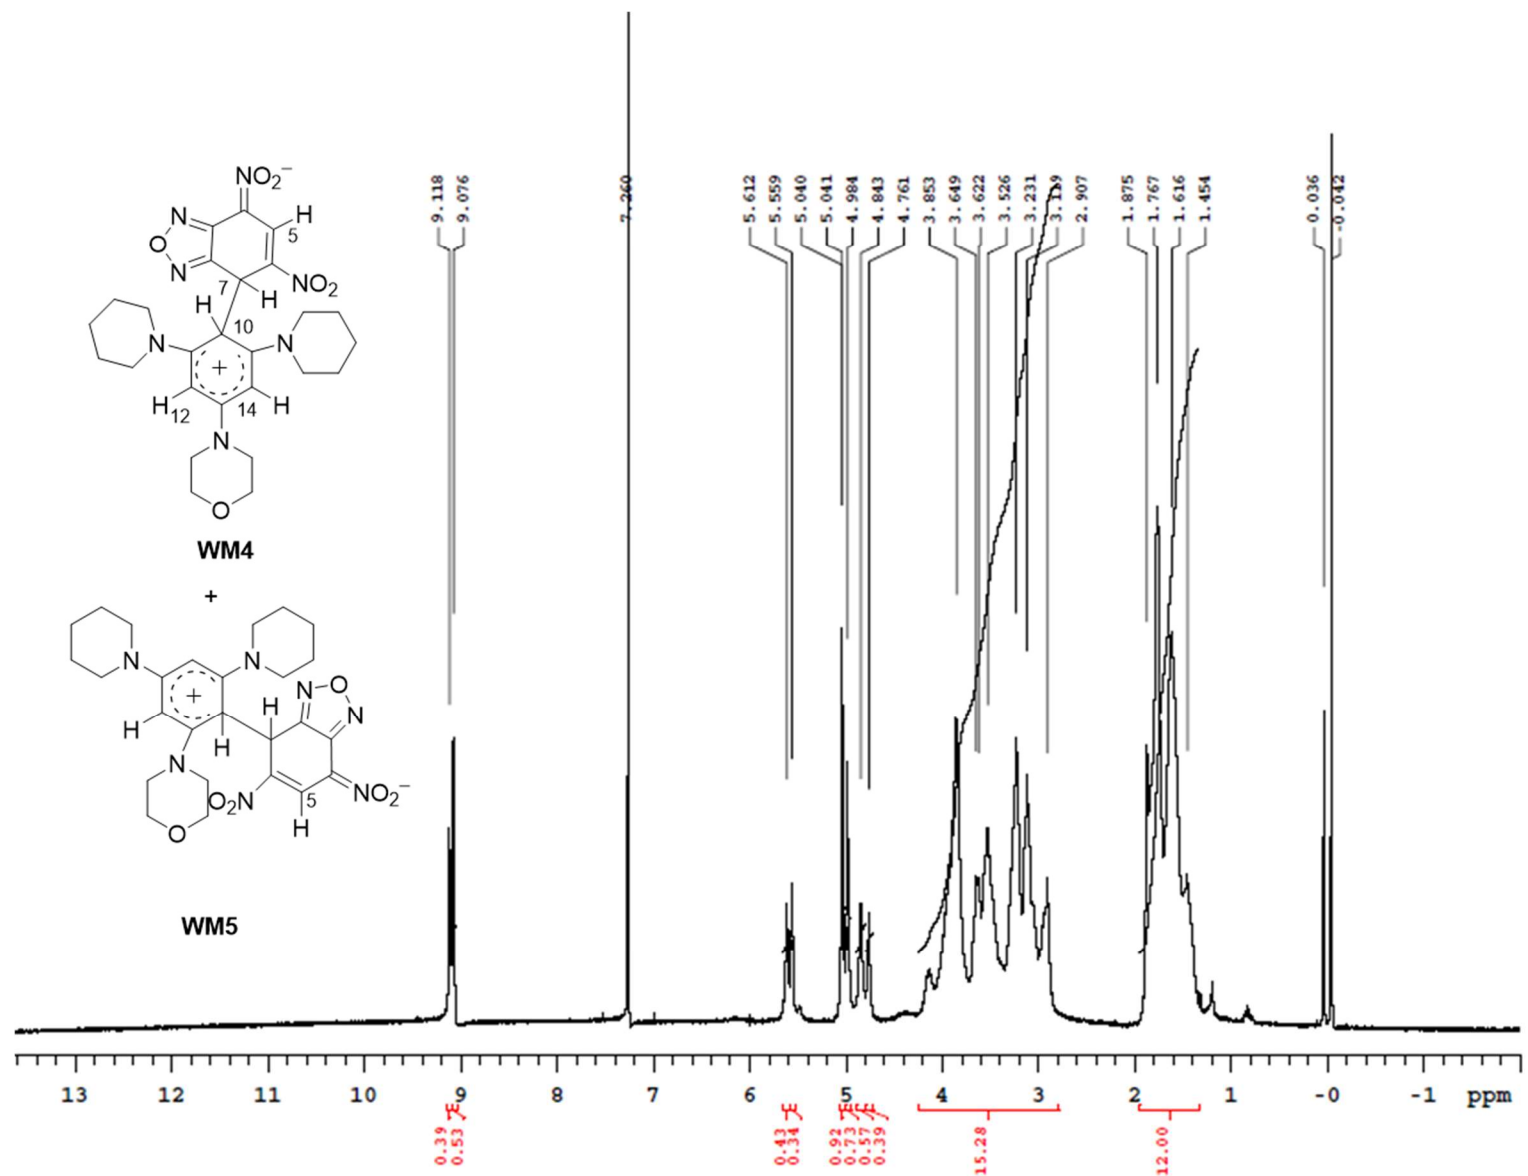

**Figure SI-34.** <sup>1</sup>H NMR spectrum (CDCl<sub>3</sub>, 400 MHz, -37 °C) of compound **WM4** and **WM5**

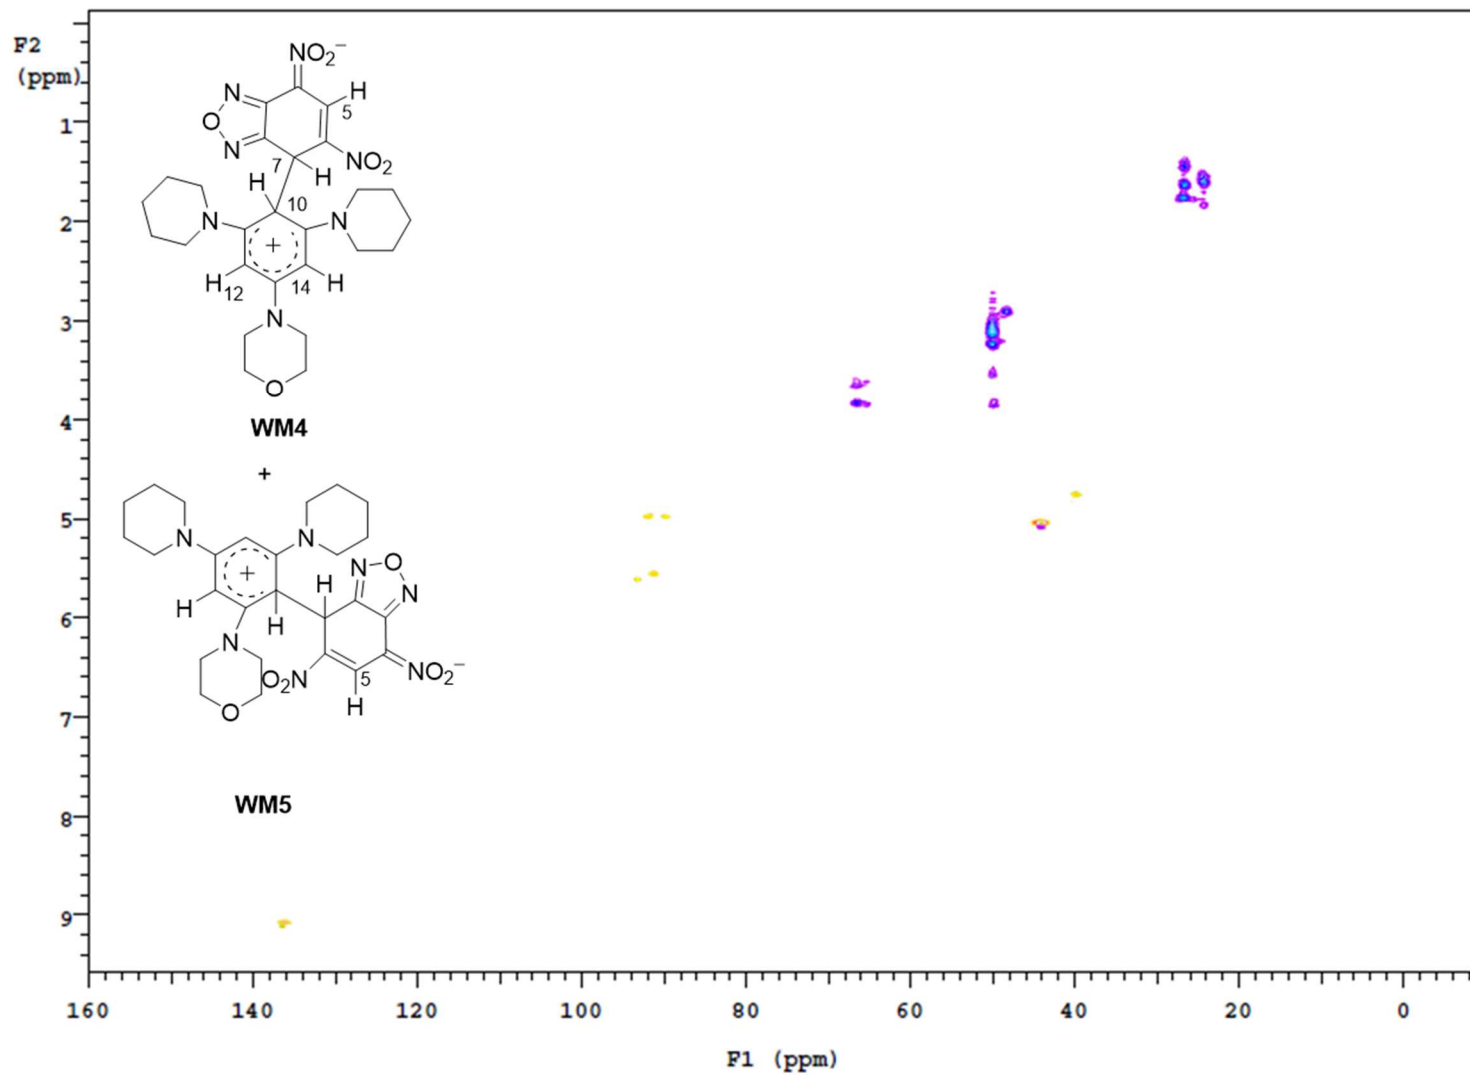

Figure SI-35. g-HSQC spectrum ( $\text{CDCl}_3$ , 100.6 MHz,  $-37^\circ\text{C}$ ) of compound **WM4** and **WM5**

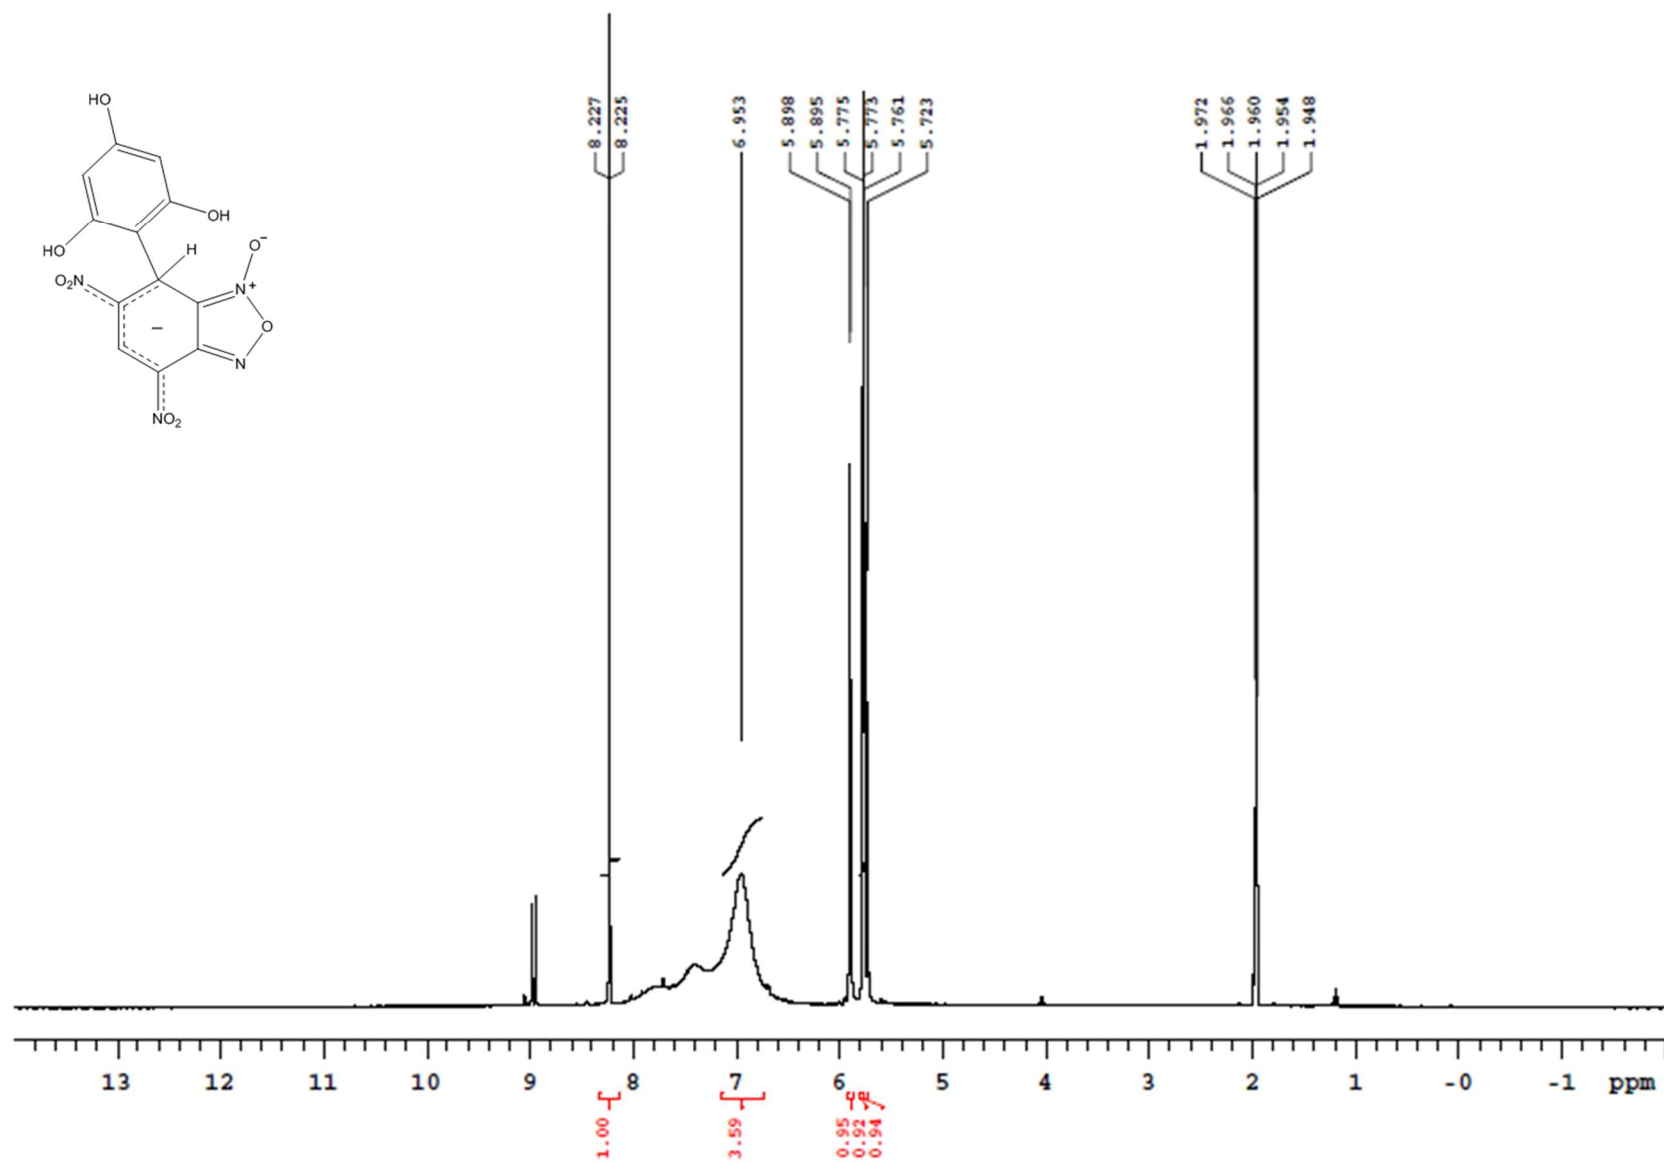

Figure SI-36. <sup>1</sup>H NMR spectrum (CD<sub>3</sub>CN, 400 MHz, -35 °C) of compound M1

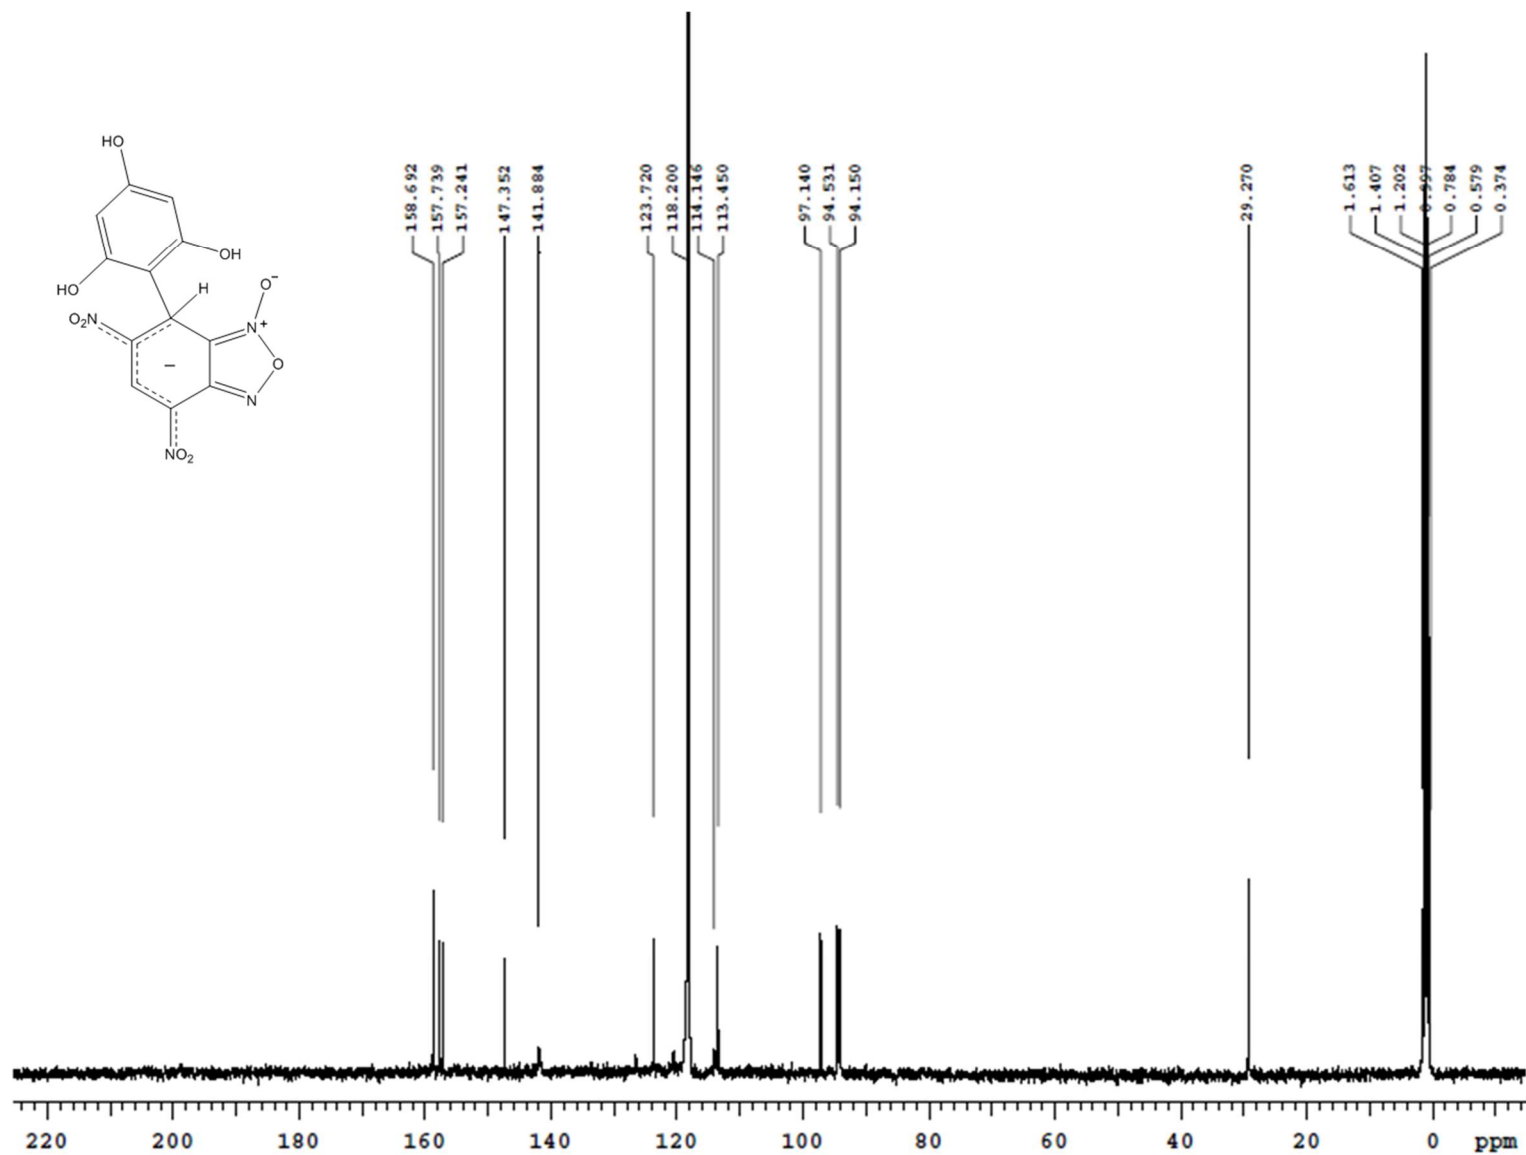

Figure SI-37. <sup>13</sup>C NMR spectrum (CD<sub>3</sub>CN, 100.56 MHz, -35 °C) of compound M1

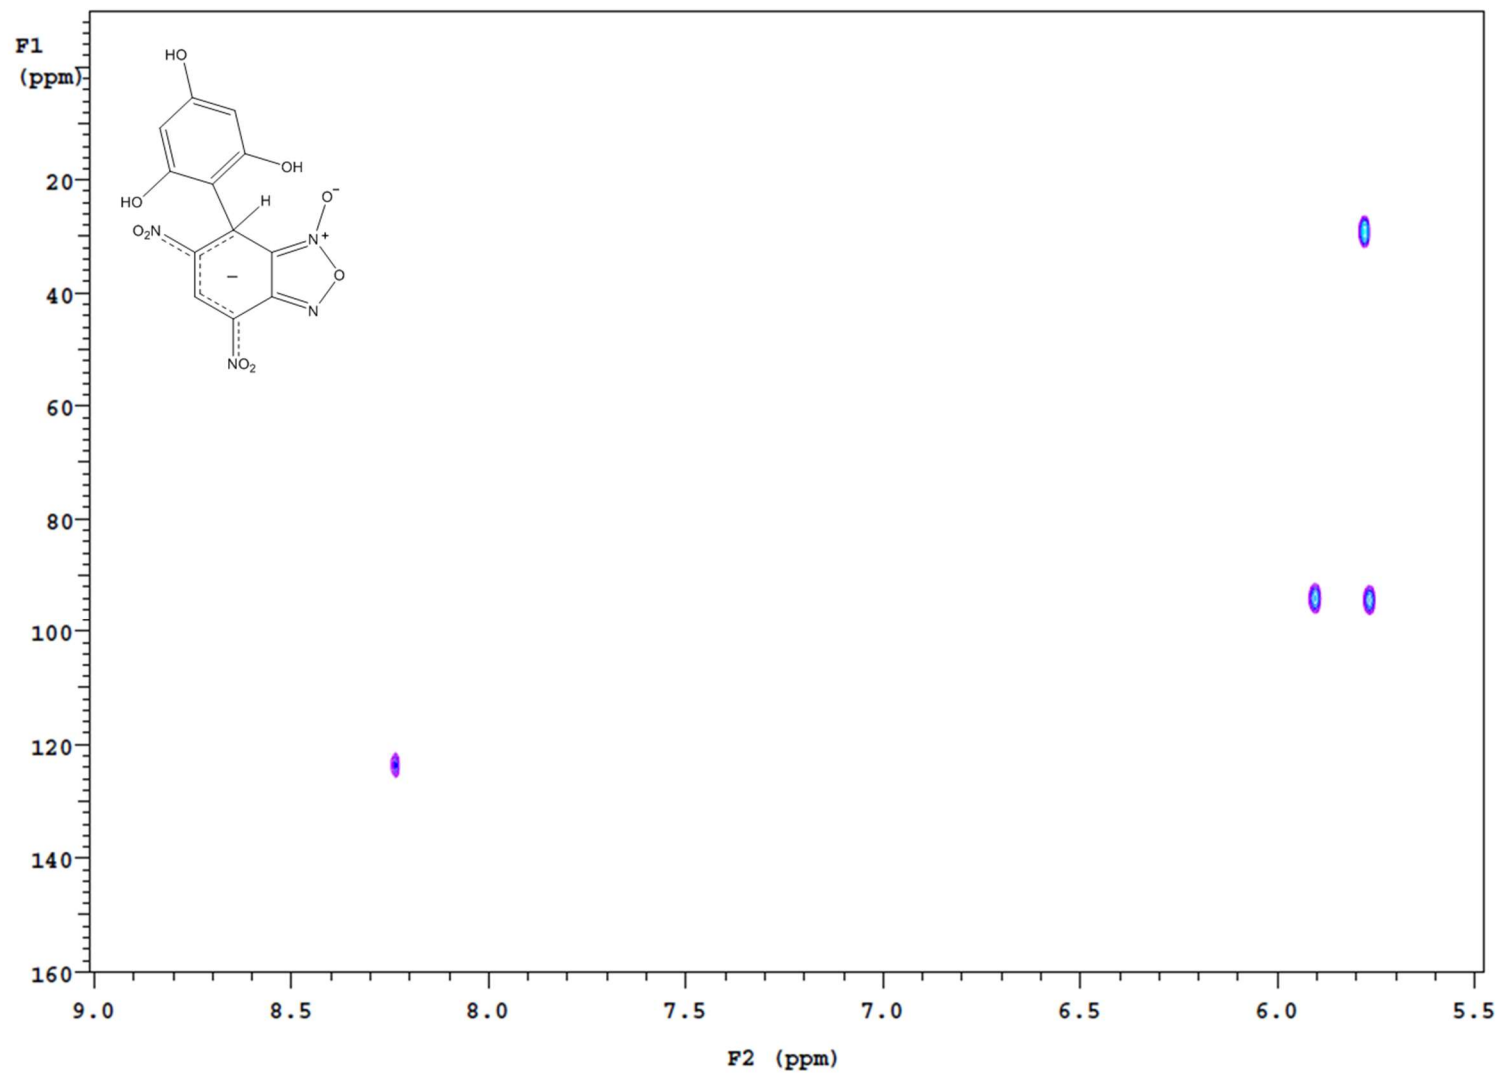

Figure SI-38. HSQC spectrum (CD<sub>3</sub>CN, 400 MHz, -35 °C) of compound M1

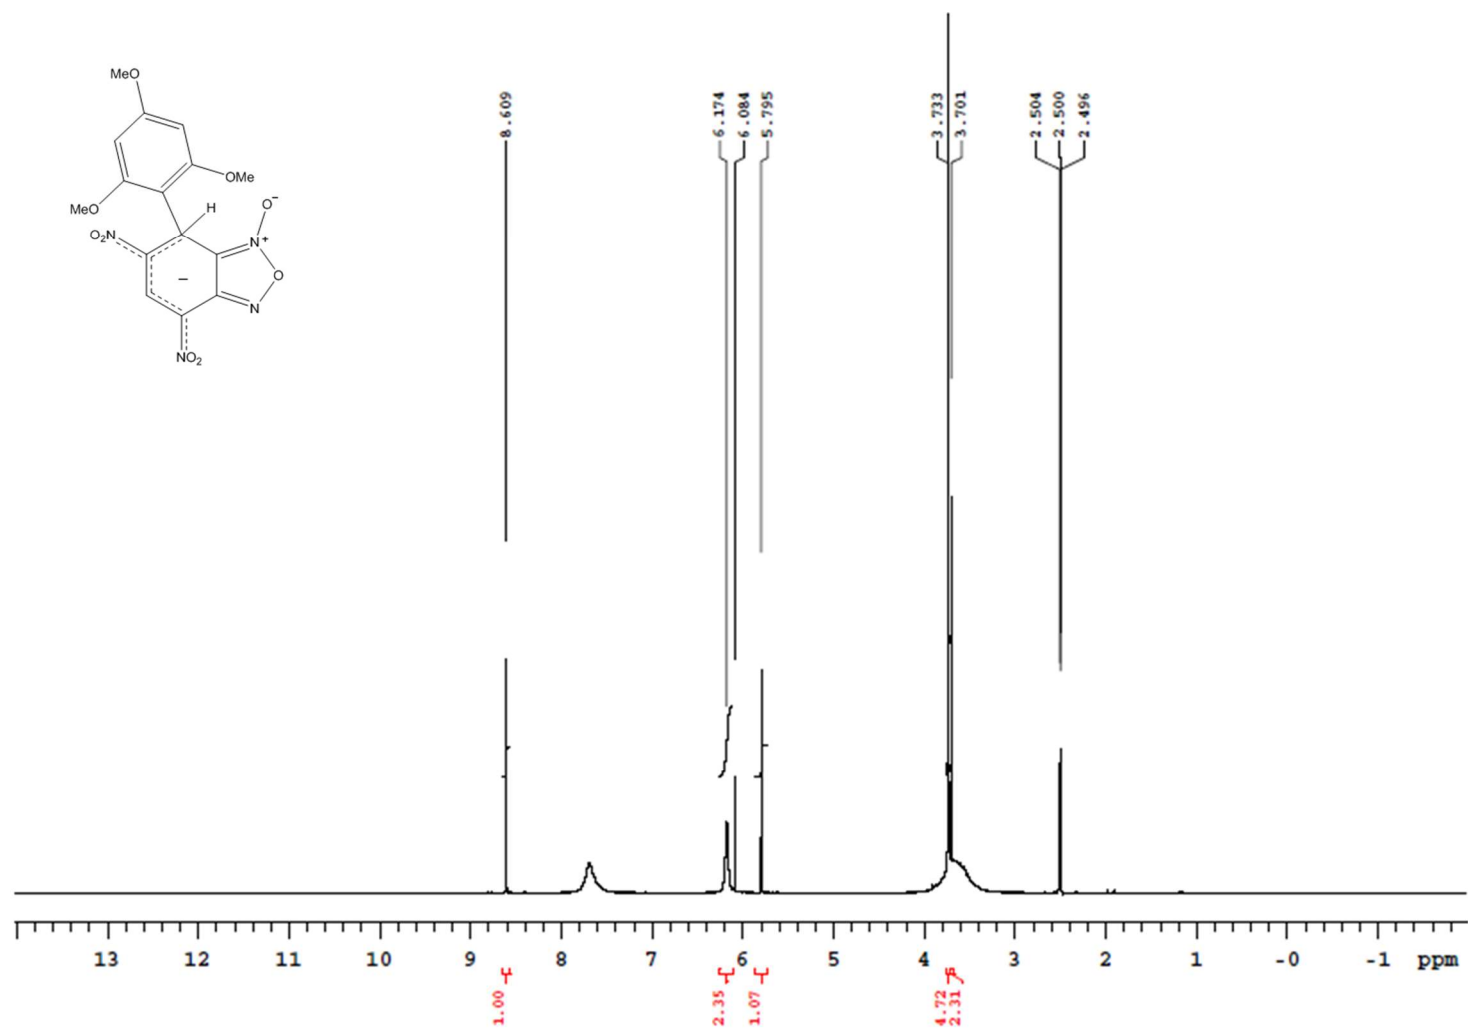

Figure SI-39. <sup>1</sup>H NMR spectrum (DMSO-*d*<sub>6</sub>, 400 MHz, 25 °C) of compound M2



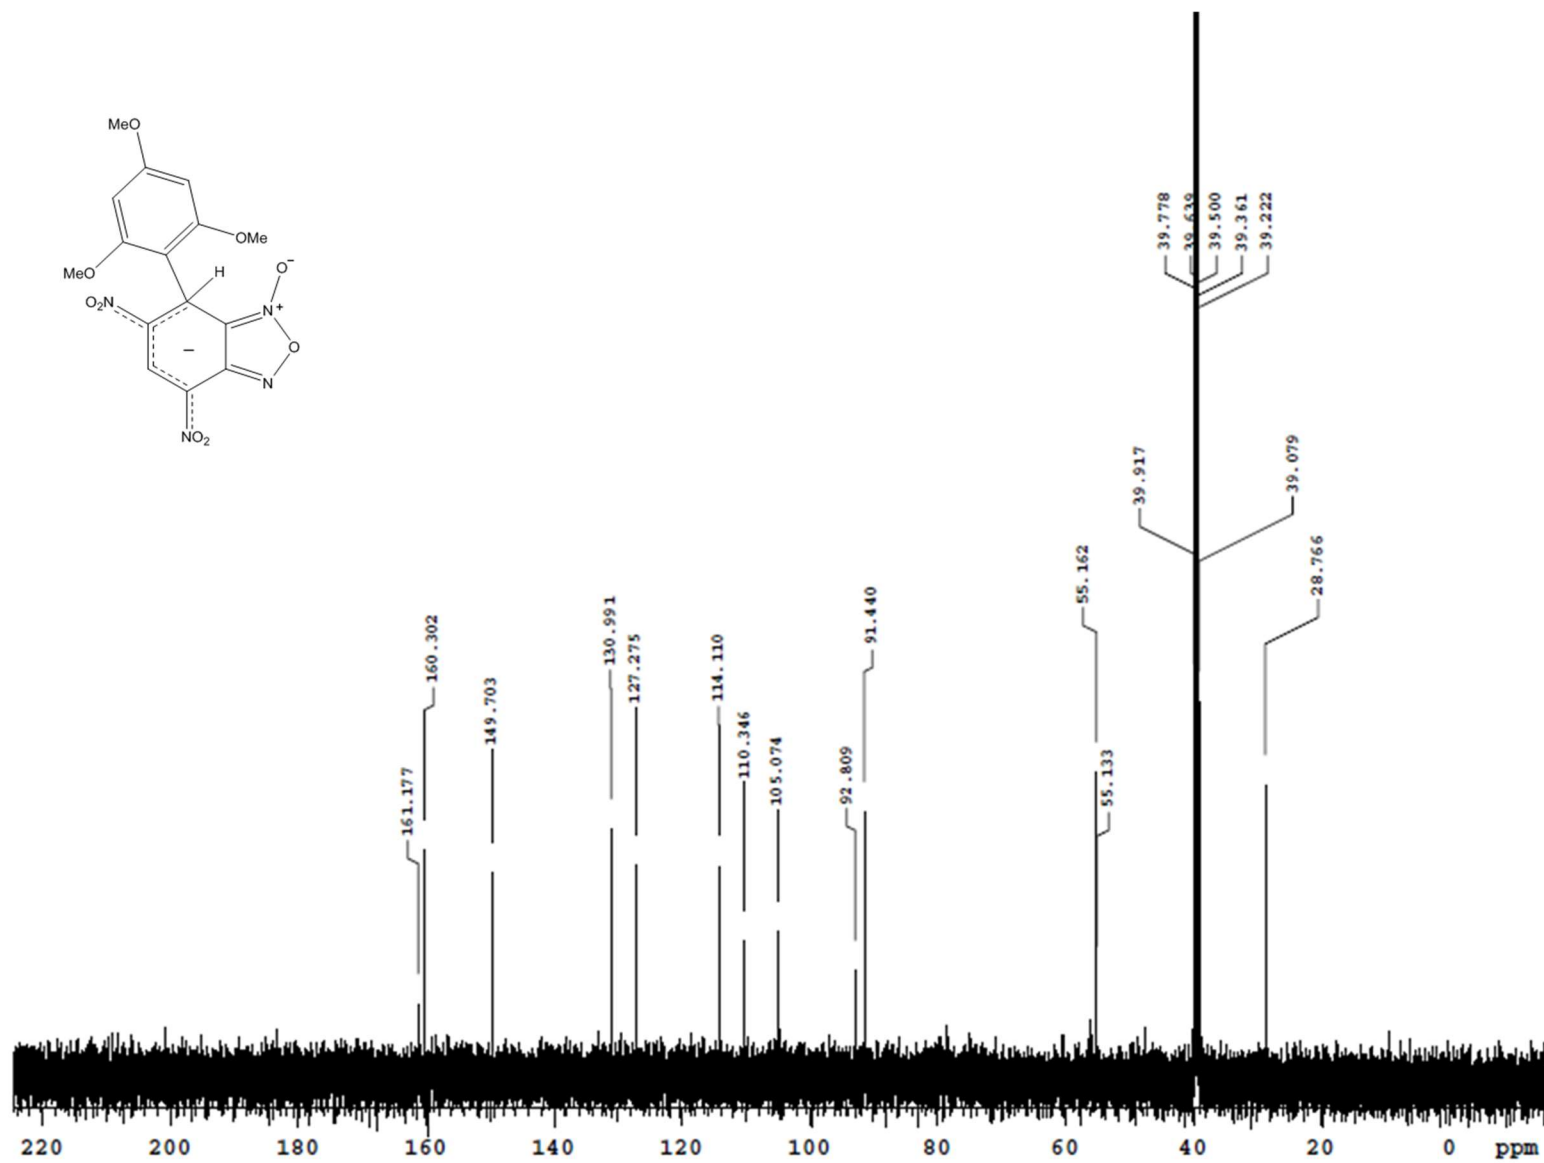

Figure SI-40.  $^{13}\text{C}$  NMR spectrum ( $\text{DMSO-}d_6$ , 150.80 MHz, 25 °C) of compound M2

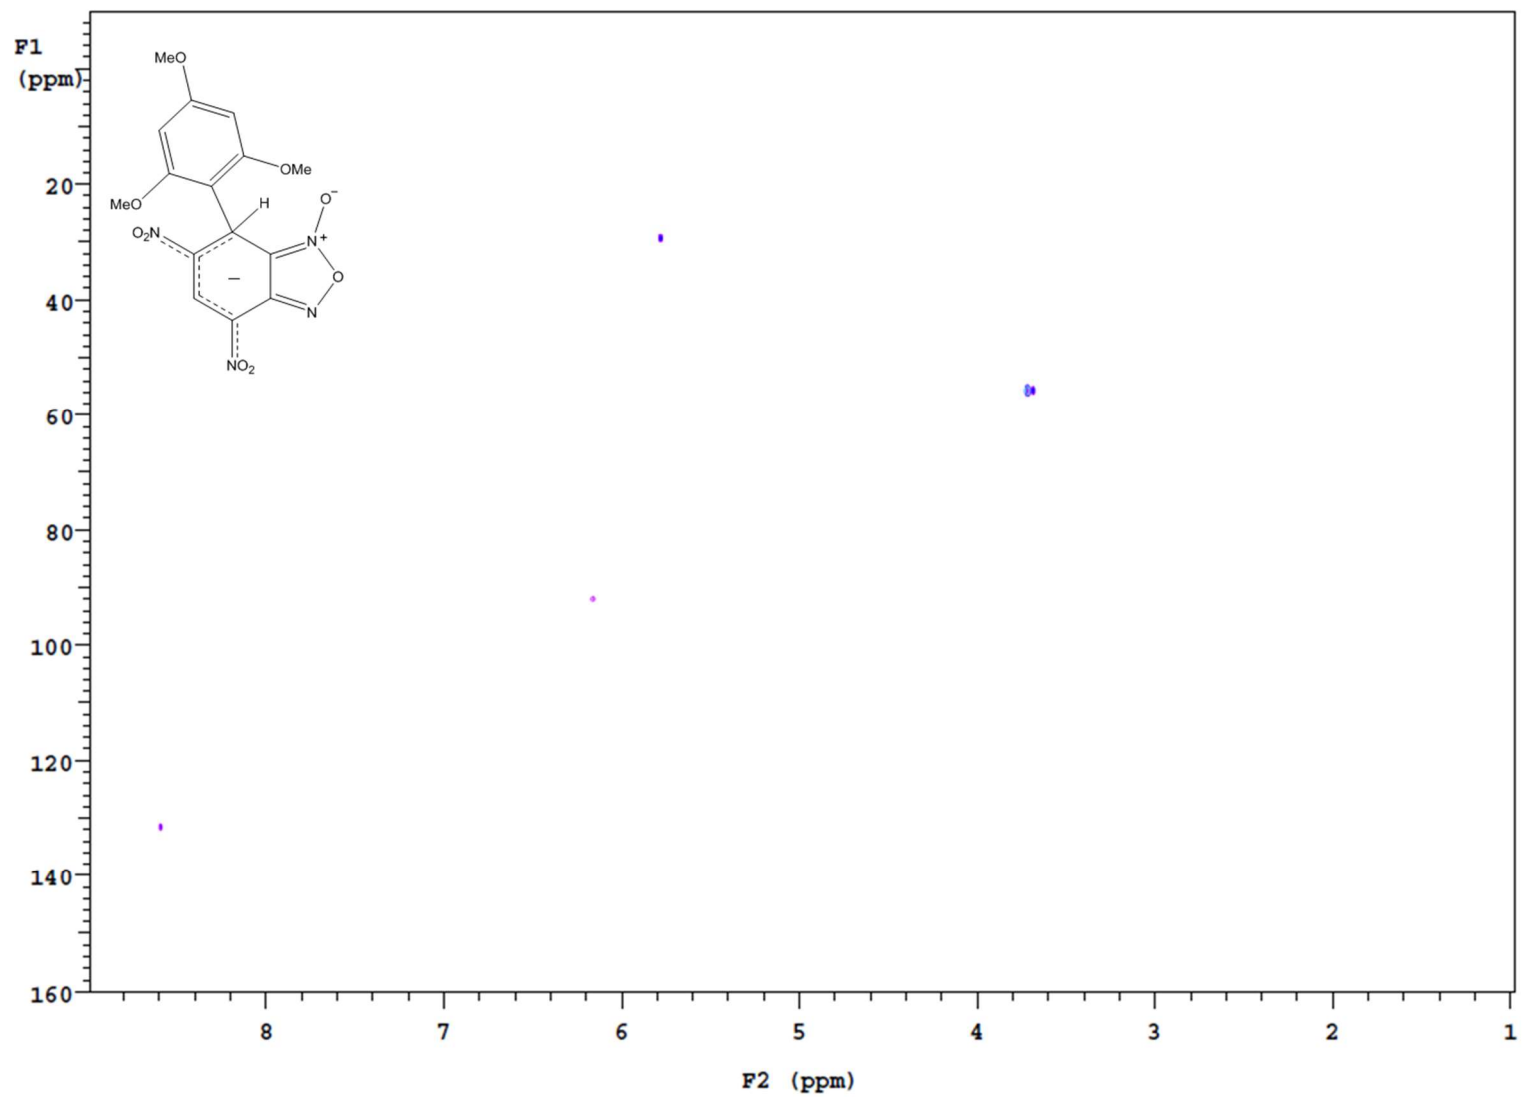

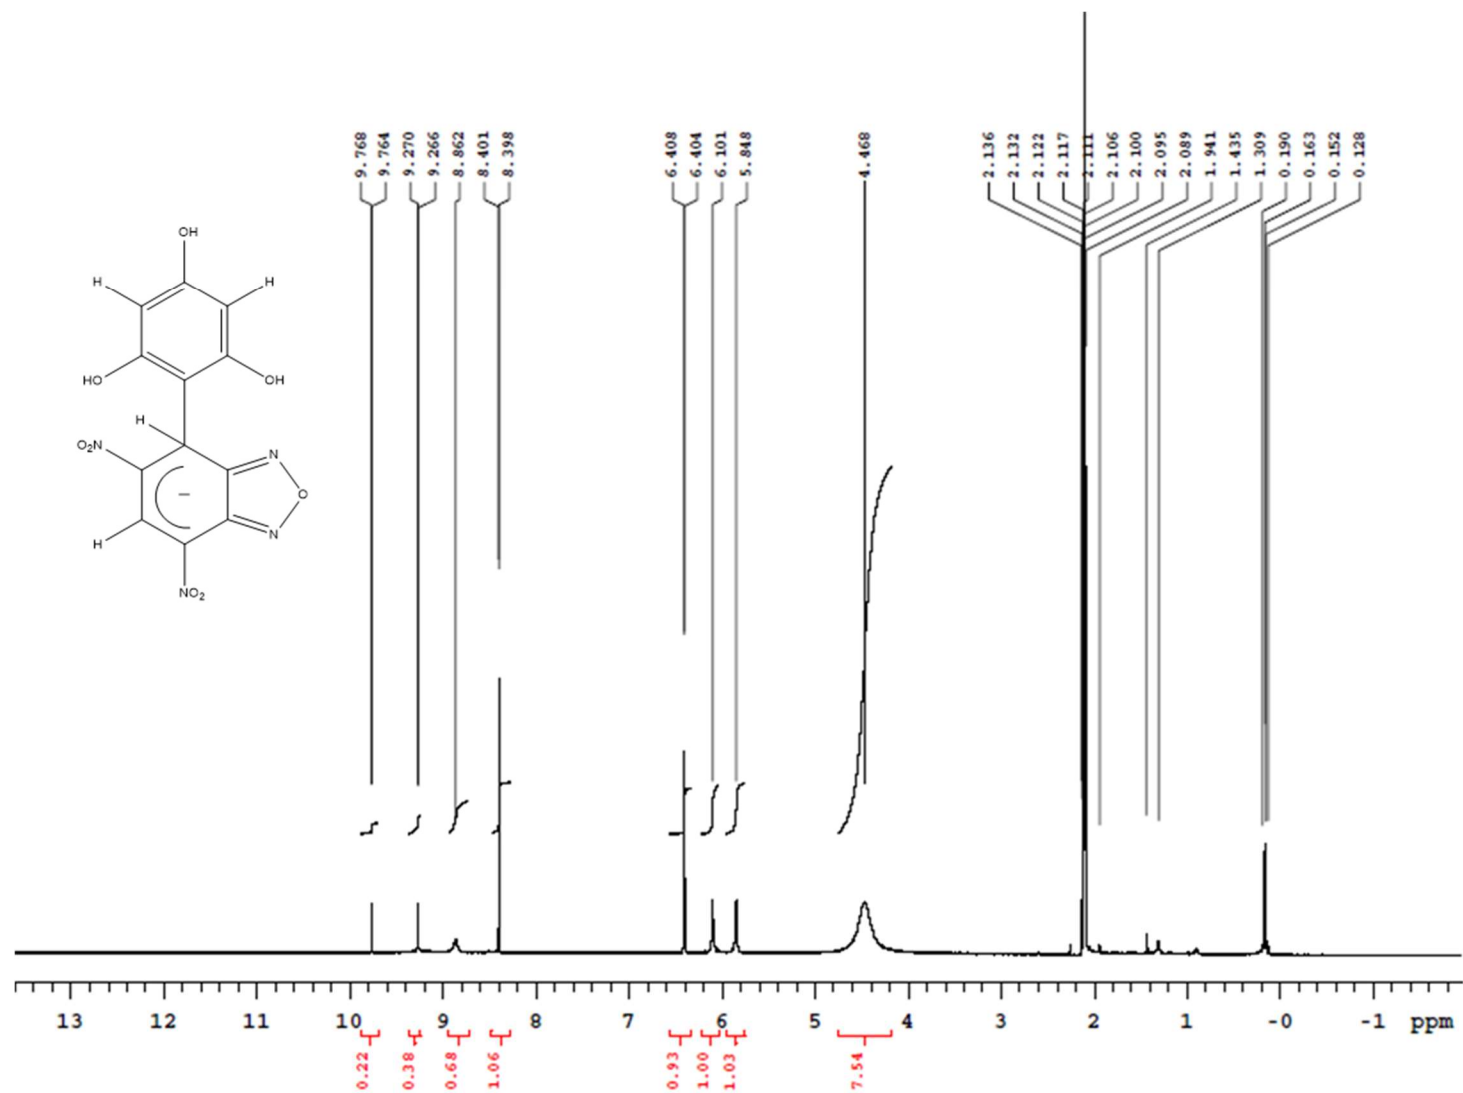

**Figure SI-42.** <sup>1</sup>H NMR spectrum (CD<sub>3</sub>COCD<sub>3</sub>, 400 MHz, -10 °C) of compound **M3**; signals at 9.27 and 9.76 ppm belong to unreacted starting DNBZ, likely added in excess.

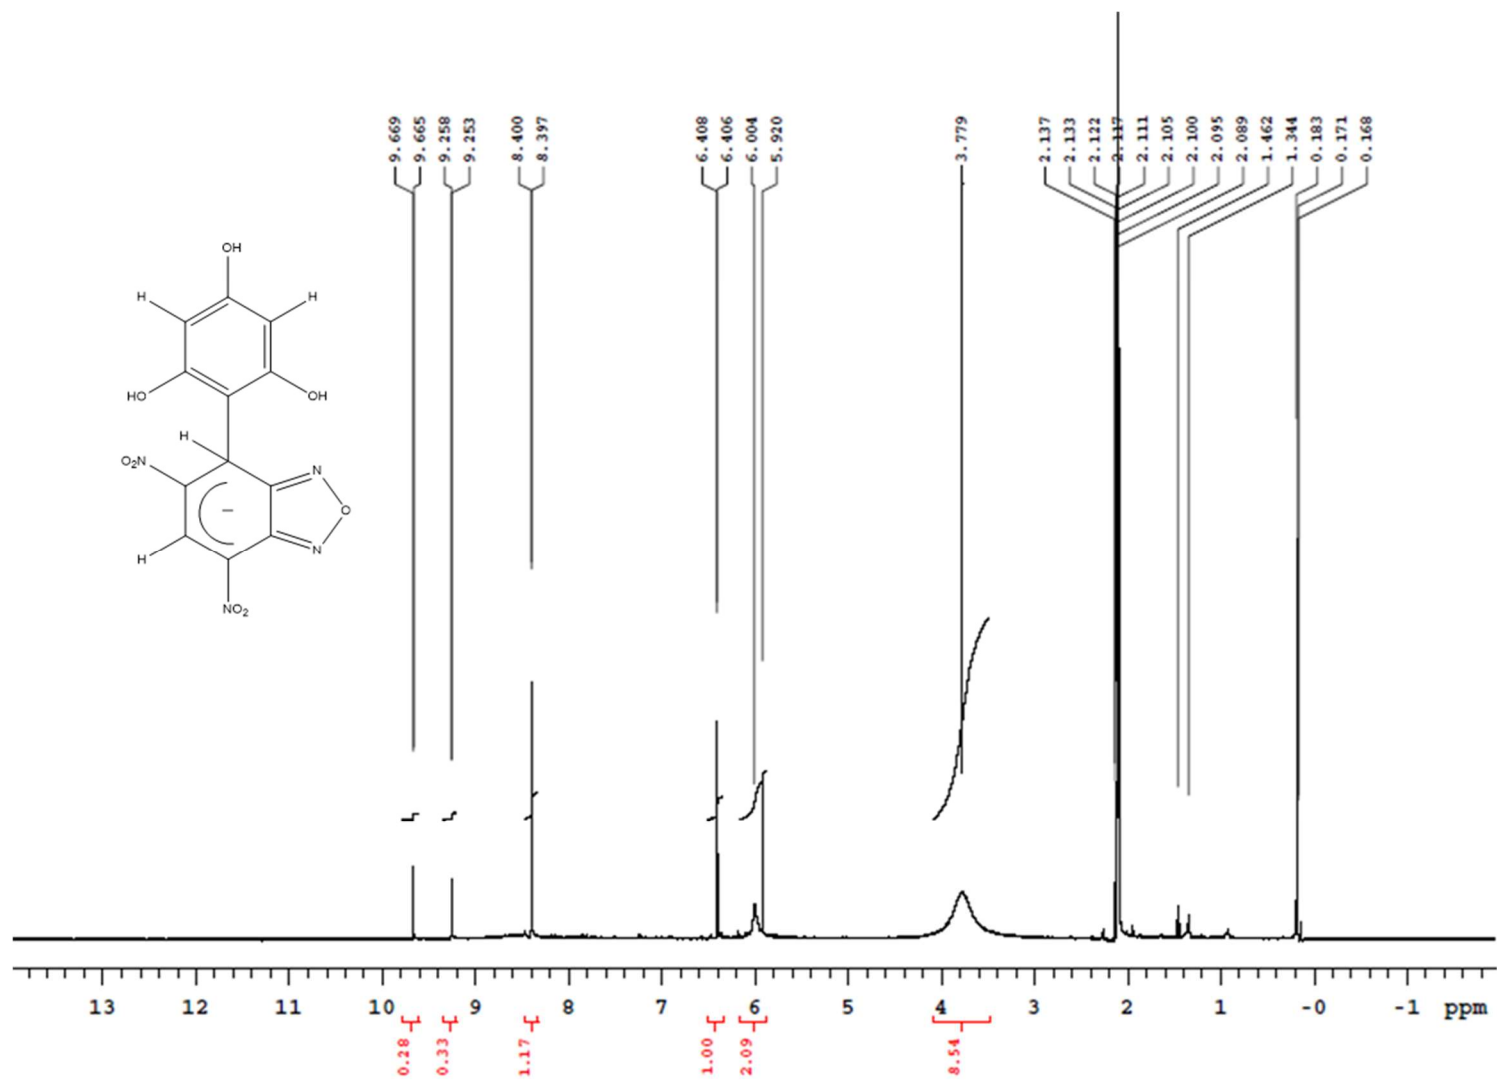

**Figure SI-43.** <sup>1</sup>H NMR spectrum (CD<sub>3</sub>COCD<sub>3</sub>, 400 MHz, +35 °C) of compound **M3**; signals at 9.27 and 9.76 ppm belong to unreacted starting DNBZ, likely added in excess.

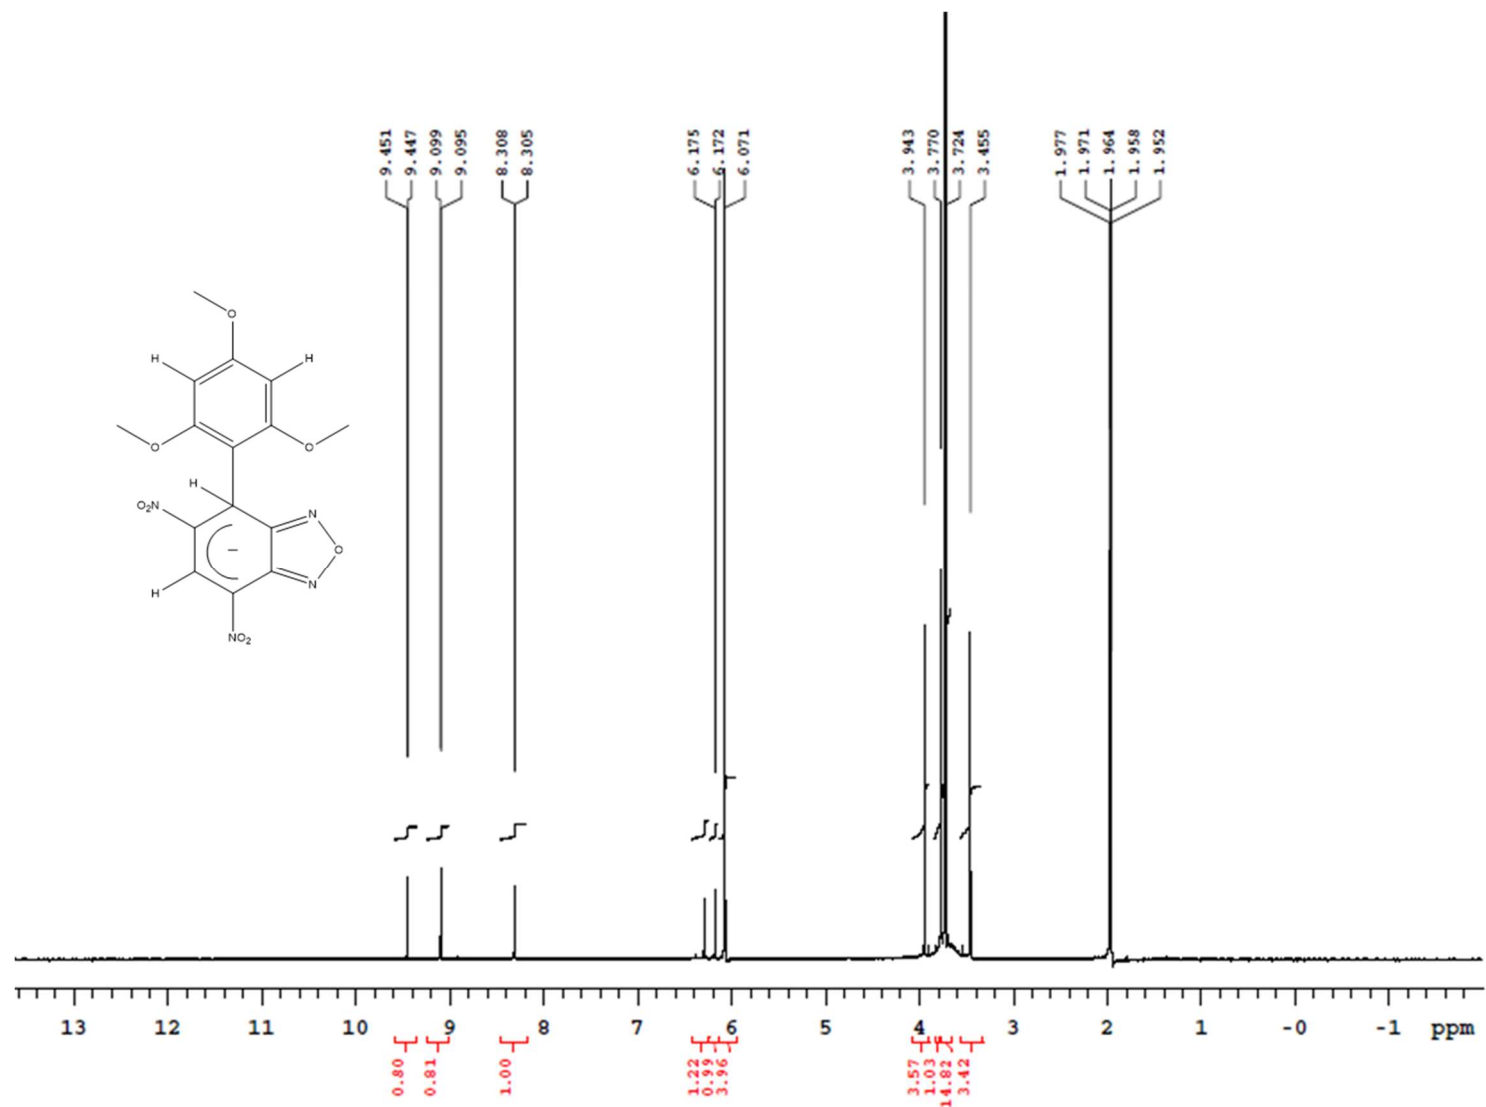

**Figure SI-44.** <sup>1</sup>H NMR spectrum (CD<sub>3</sub>CN, 400 MHz, -35 °C) of compound **M4**; signals at 9.45, 9.10, 6.07, and 3.72 ppm belong to unreacted starting materials.

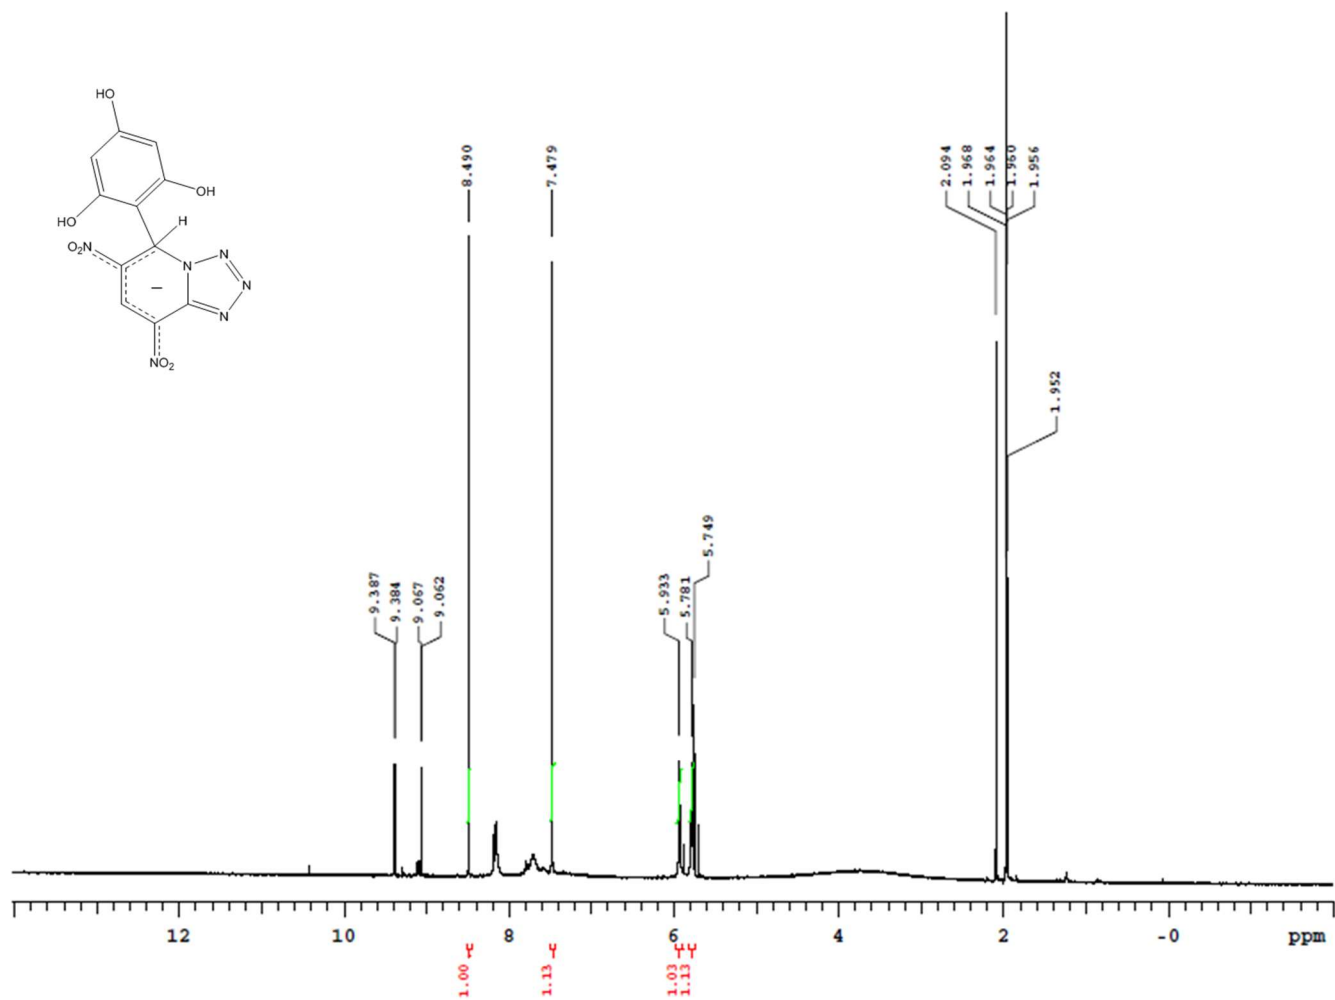

**Figure SI-45.** <sup>1</sup>H NMR spectrum (CD<sub>3</sub>CN, 600 MHz, -35 °C) of compound **M5**, together with signals belonging to unreacted starting materials

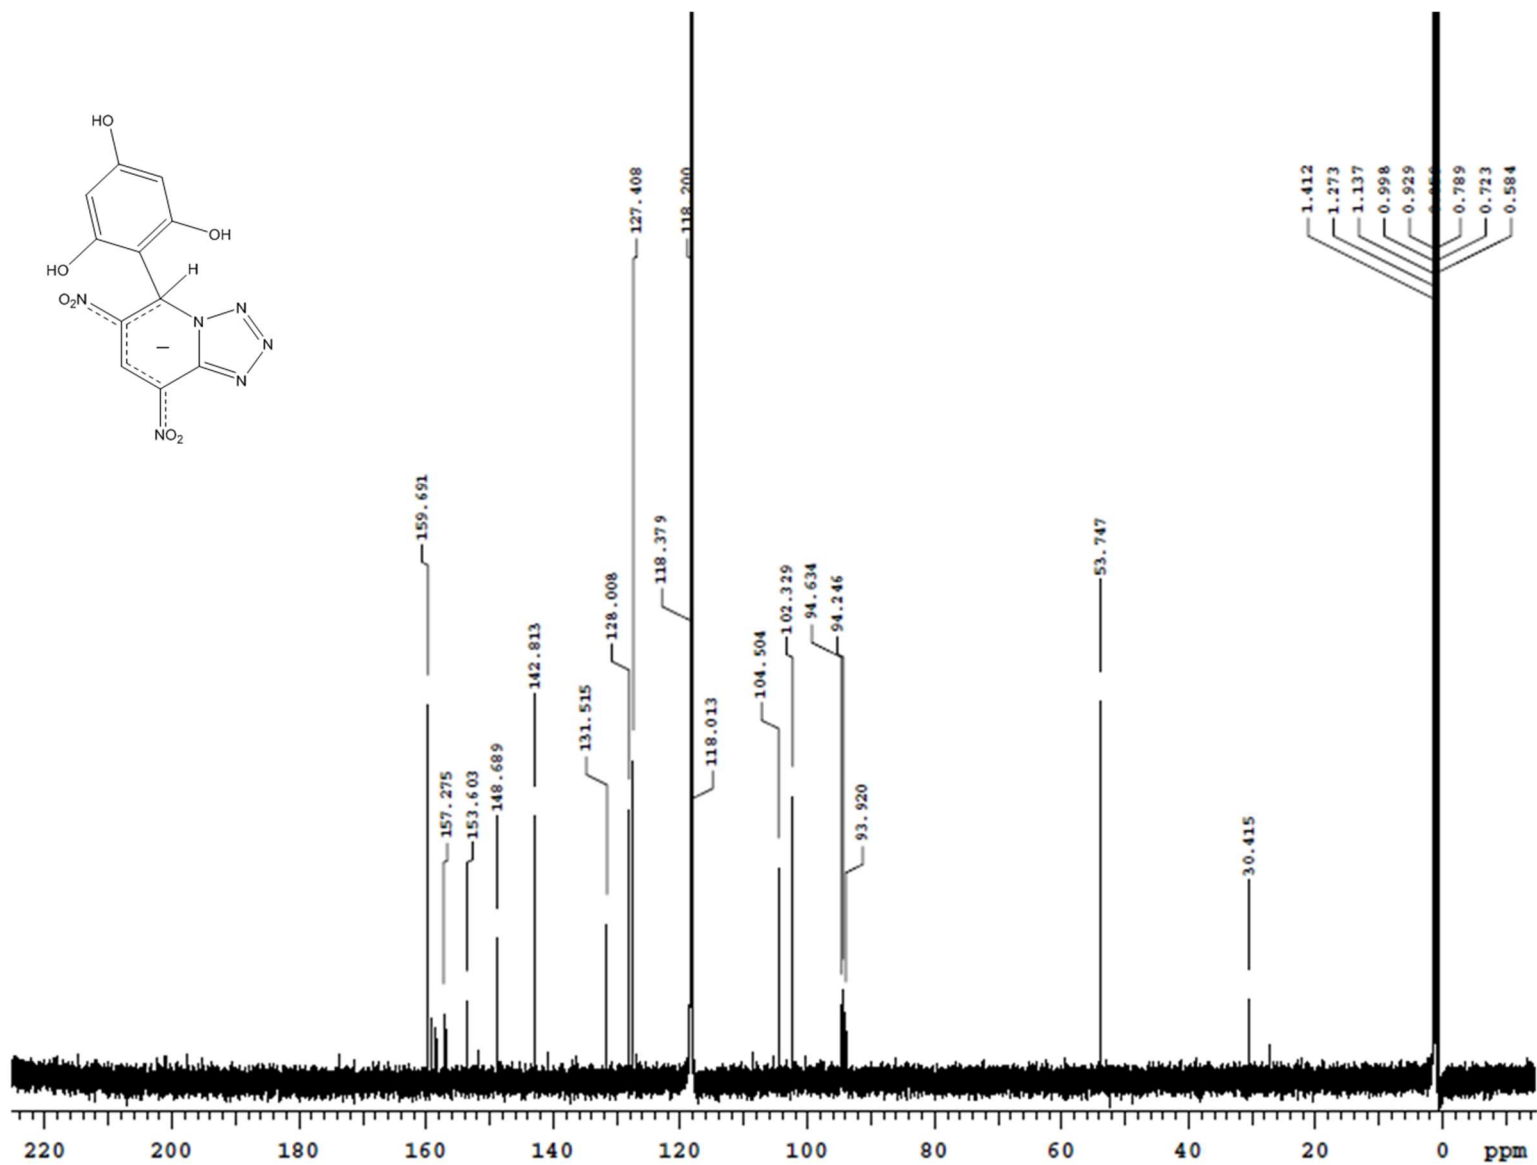

Figure SI-46. <sup>13</sup>C NMR (CD<sub>3</sub>CN, 150.80 MHz, -35 °C) of compound **M5** together with signals belonging to unreacted starting materials.

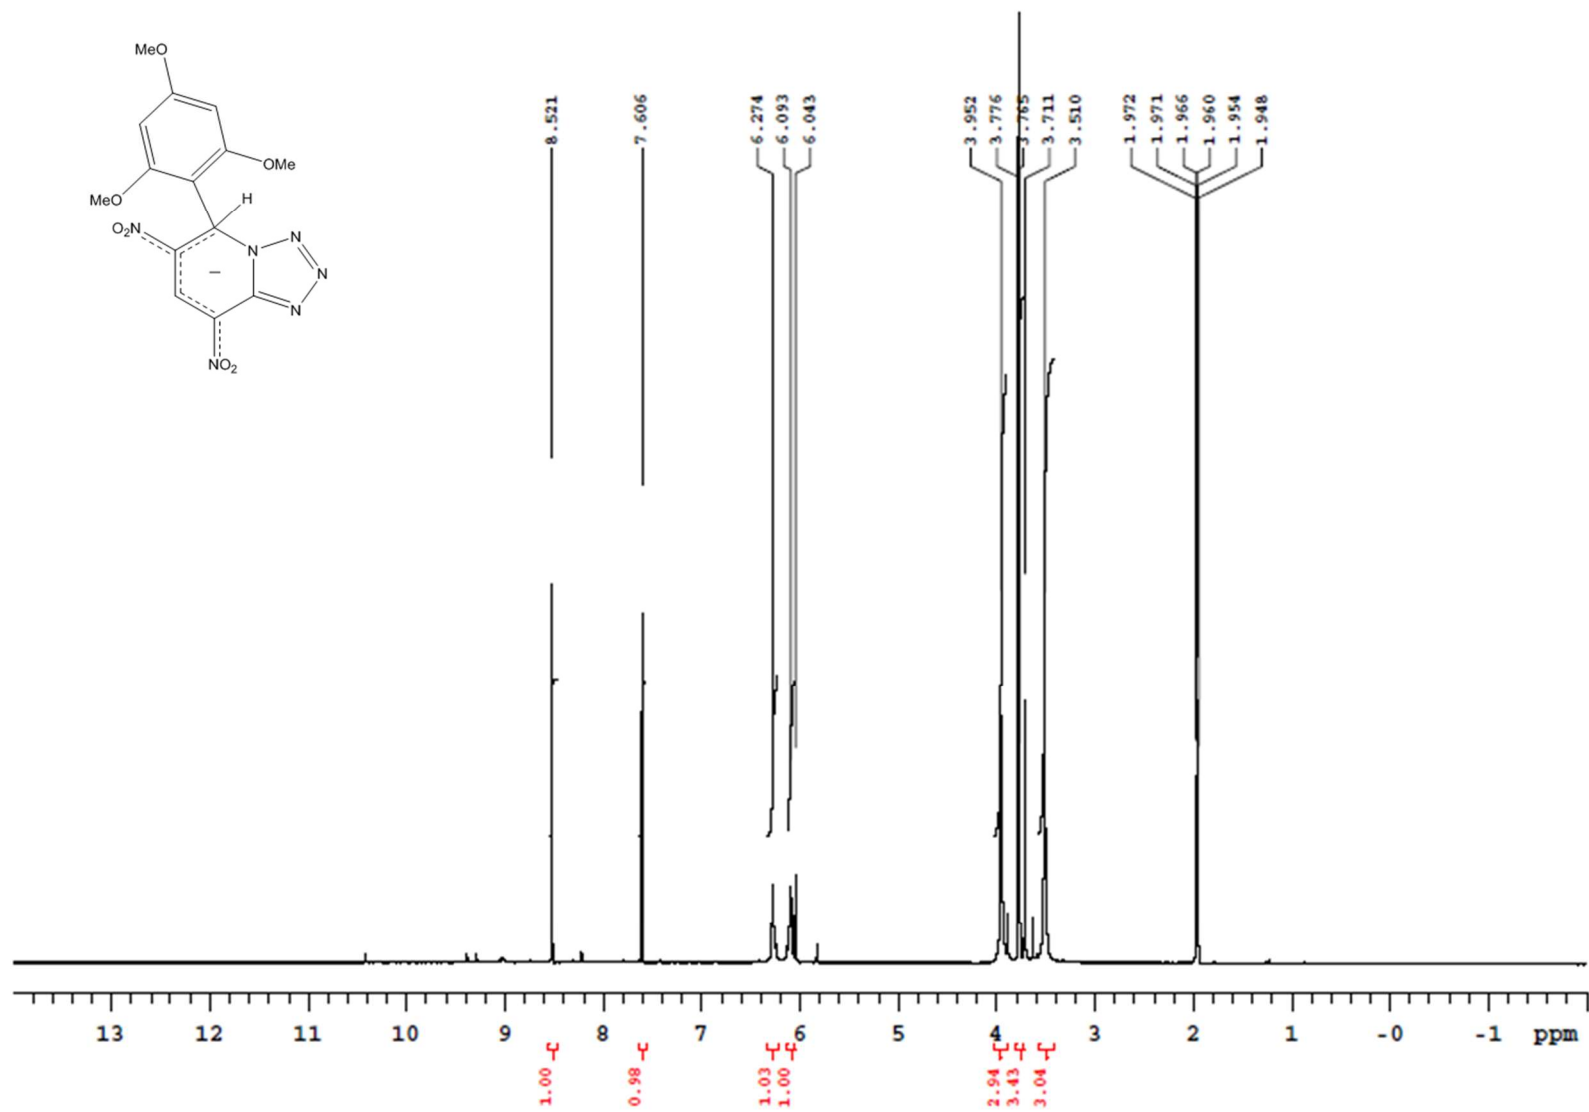

Figure SI-47. <sup>1</sup>H NMR (CD<sub>3</sub>CN, 400 MHz, -35 °C) spectrum of compound M6.



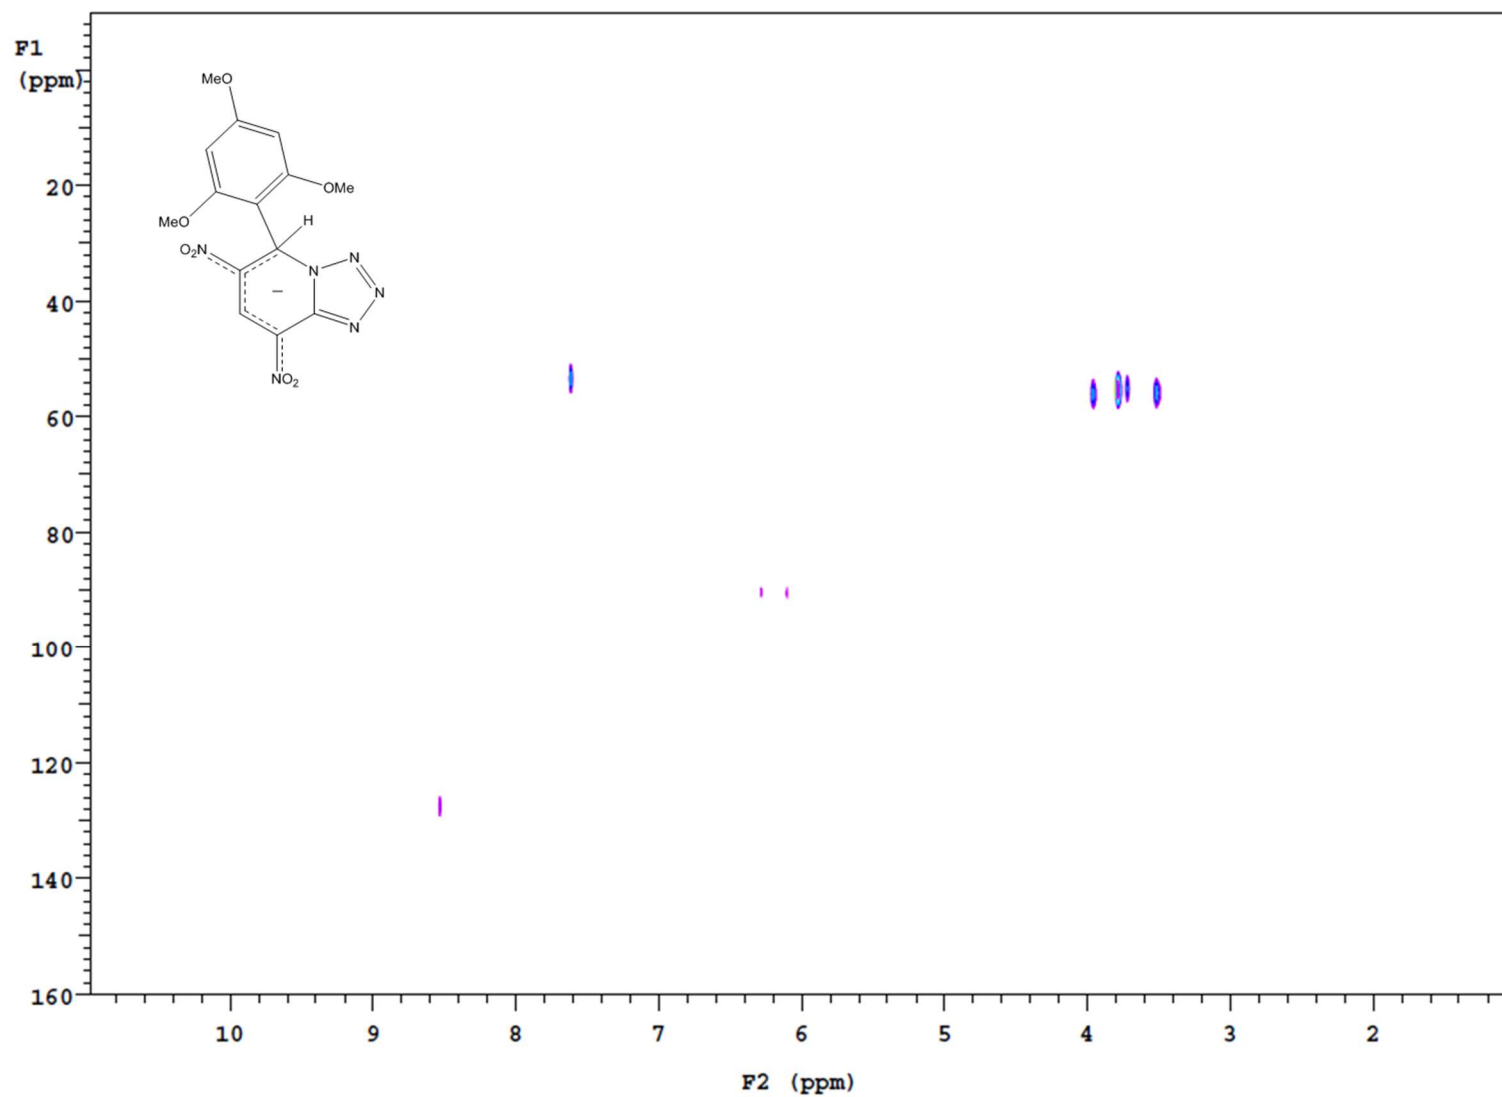

Figure SI-48. HSQC ( $\text{CD}_3\text{CN}$ , 400 MHz,  $-35\text{ }^\circ\text{C}$ ) of compound **M6**.
